# Supplementary material for: Dynamic regulation of gonadal transposon control across the lifespan of the naturally short-lived African turquoise killifish
Source: HighWire-hosted journal article supplement (doi:10.1101/gr.277301.122), 2022-12-28
Supplement: Supplemental_Table_S2.xlsx [file Supplemental_Table_S2.xlsx]

## Sheet: Index
Supplemental Table S2: List of genes with differential expression significance with age by DESeq2 LRT (FDR < 10-6), and expression of “piRNA metabolic pathway” GO term associated genes.
	A	Complete Genic Ovarian DESeq2 LRT Analysis with clusters
	B	Complete Genic Testicular DESeq2 LRT Analysis with clusters
	C	DEseq2 VST-Normalized log2(count) gene expression for "piRNA metabolic process" GO term (Ovaries and testes)
	D	Best BLAST hit with E-val < 10-3 for turquoise killifish protein sequences aligning to Human Ensembl 104 protein sequences

## Sheet: A
Gene	Mean expression	stat	pvalue	padj	dgepatterns cluster
G4P62_000009	39.5324	35.3274	2.13188e-08	2.35926e-07	a
G4P62_000021	988.107	38.0993	5.33132e-09	6.80598e-08	a
G4P62_000029	696.198	40.8207	1.36743e-09	1.98851e-08	a
G4P62_000030	646.562	57.4276	3.38656e-13	1.10864e-11	a
G4P62_000036	123.81	36.7375	1.05328e-08	1.25296e-07	a
G4P62_000037	321.495	36.3033	1.30869e-08	1.5208e-07	a
G4P62_000057	484.557	51.8762	5.43543e-12	1.35821e-10	a
G4P62_000058	337.689	44.5633	2.1048e-10	3.71906e-09	a
G4P62_000068	223.624	34.7607	2.8302e-08	3.02427e-07	a
G4P62_000086	95.3319	37.93	5.80231e-09	7.33188e-08	a
G4P62_000109	188.643	32.2874	9.7472e-08	9.04271e-07	a
G4P62_000132	2090.85	44.3502	2.34143e-10	4.07579e-09	a
G4P62_000172	1143.95	45.7731	1.14948e-10	2.1498e-09	a
G4P62_000205	966.023	62.1302	3.22557e-14	1.27543e-12	a
G4P62_000206	119.879	71.4109	3.11397e-16	1.84695e-14	a
G4P62_000207	210.883	59.016	1.53053e-13	5.3066e-12	a
G4P62_000237	228.334	34.4859	3.24707e-08	3.40935e-07	a
G4P62_000255	1020.06	47.2756	5.42286e-11	1.07013e-09	a
G4P62_000318	46090.3	67.9832	1.72835e-15	8.85779e-14	a
G4P62_000333	1313.59	35.5563	1.90125e-08	2.12183e-07	a
G4P62_000336	46.4035	34.8289	2.73523e-08	2.93766e-07	a
G4P62_000338	1165.12	38.7049	3.93856e-09	5.15898e-08	a
G4P62_000348	74769.5	80.9947	2.58356e-18	2.39792e-16	a
G4P62_000361	39988.5	142.41	1.19121e-31	2.28658e-28	a
G4P62_000362	43467.6	53.947	1.92997e-12	5.35496e-11	a
G4P62_000390	497.998	34.2613	3.63286e-08	3.7455e-07	a
G4P62_000392	2242.84	42.282	6.58554e-10	1.03232e-08	a
G4P62_000425	481.383	34.3449	3.48412e-08	3.61688e-07	a
G4P62_000456	7088.7	32.5201	8.67682e-08	8.14271e-07	a
G4P62_000457	3710.21	38.9962	3.40466e-09	4.52135e-08	a
G4P62_000459	1041.37	58.5581	1.9243e-13	6.49069e-12	a
G4P62_000483	1660.64	45.3613	1.41227e-10	2.59695e-09	a
G4P62_000485	677.245	43.1919	4.17826e-10	6.83907e-09	a
G4P62_000500	15.8039	37.1882	8.40796e-09	1.02799e-07	a
G4P62_000514	1026.79	50.6389	1.00903e-11	2.39122e-10	a
G4P62_000560	1391.06	77.1194	1.79363e-17	1.38727e-15	a
G4P62_000583	2852.15	42.0564	7.37184e-10	1.14453e-08	a
G4P62_000601	2168.71	50.6393	1.00883e-11	2.39122e-10	a
G4P62_000653	843.61	44.2684	2.4391e-10	4.23089e-09	a
G4P62_000667	483.73	90.8751	1.84808e-20	2.60629e-18	a
G4P62_000674	731.119	32.8334	7.41857e-08	7.1169e-07	a
G4P62_000690	263.567	55.616	8.37792e-13	2.50922e-11	a
G4P62_000716	2905.19	89.8128	3.14335e-20	4.20075e-18	a
G4P62_000733	1098.53	41.4924	9.77333e-10	1.47476e-08	a
G4P62_000742	86.9214	70.8135	4.19812e-16	2.40601e-14	a
G4P62_000747	141.295	46.758	7.02457e-11	1.35952e-09	a
G4P62_000772	242.981	42.1354	7.08631e-10	1.10263e-08	a
G4P62_000791	20.9221	46.4452	8.21396e-11	1.57814e-09	a
G4P62_000794	1078.31	54.8963	1.20064e-12	3.48715e-11	a
G4P62_000798	1953.82	39.2173	3.04835e-09	4.10415e-08	a
G4P62_000812	757.211	77.3571	1.59268e-17	1.25953e-15	a
G4P62_000833	508.601	35.243	2.22375e-08	2.4442e-07	a
G4P62_000876	44.9297	35.8177	1.66831e-08	1.89593e-07	a
G4P62_000904	605.183	37.7869	6.23263e-09	7.81484e-08	a
G4P62_000909	269.4	34.0815	3.97459e-08	4.07792e-07	a
G4P62_000956	1775.68	68.39	1.41025e-15	7.37837e-14	a
G4P62_001026	752.855	57.4163	3.40569e-13	1.11146e-11	a
G4P62_001044	321.474	40.9682	1.27018e-09	1.86249e-08	a
G4P62_001056	296.542	42.901	4.83249e-10	7.80108e-09	a
G4P62_001066	1759.25	45.5384	1.29261e-10	2.3922e-09	a
G4P62_001073	814.711	49.1164	2.16032e-11	4.75157e-10	a
G4P62_001074	1769.58	49.8842	1.47157e-11	3.33751e-10	a
G4P62_001076	974.256	51.8632	5.47076e-12	1.36436e-10	a
G4P62_001082	274.468	88.0001	7.78056e-20	9.77896e-18	a
G4P62_001124	187.775	83.8676	6.14313e-19	6.55112e-17	a
G4P62_001165	621.637	49.4857	1.79608e-11	4.0089e-10	a
G4P62_001224	292.984	34.512	3.20484e-08	3.37339e-07	a
G4P62_001226	956.574	63.8403	1.37167e-14	5.83818e-13	a
G4P62_001228	211.55	34.9151	2.61985e-08	2.82957e-07	a
G4P62_001243	1162.55	34.5038	3.21812e-08	3.38399e-07	a
G4P62_001275	532.409	60.3288	7.93908e-14	2.88029e-12	a
G4P62_001278	211.133	50.356	1.16234e-11	2.71791e-10	a
G4P62_001288	235.923	37.0793	8.87847e-09	1.07927e-07	a
G4P62_001294	185.805	33.2417	6.04868e-08	5.95741e-07	a
G4P62_001305	794.401	38.2722	4.88975e-09	6.31867e-08	a
G4P62_001313	27.5275	34.3112	3.54346e-08	3.67305e-07	a
G4P62_001335	264.03	80.855	2.77049e-18	2.54343e-16	a
G4P62_001388	8136.31	44.5675	2.10036e-10	3.71433e-09	a
G4P62_001392	4790.37	35.0442	2.45615e-08	2.67156e-07	a
G4P62_001402	1782.48	33.1402	6.3635e-08	6.22094e-07	a
G4P62_001438	482.502	65.2839	6.66487e-15	3.0395e-13	a
G4P62_001456	169.447	36.2579	1.33871e-08	1.55227e-07	a
G4P62_001465	2745.22	33.2844	5.92079e-08	5.84467e-07	a
G4P62_001477	511.21	34.4434	3.31671e-08	3.46695e-07	a
G4P62_001491	1031.33	47.8978	3.97297e-11	8.14561e-10	a
G4P62_001499	282.771	48.9779	2.31517e-11	5.07103e-10	a
G4P62_001519	859.549	49.9153	1.44886e-11	3.29132e-10	a
G4P62_001521	172.206	37.2655	8.08921e-09	9.90741e-08	a
G4P62_001535	5219.41	49.1104	2.16673e-11	4.76071e-10	a
G4P62_001554	32.0978	32.1229	1.0583e-07	9.73684e-07	a
G4P62_001580	839.187	50.2173	1.24578e-11	2.88113e-10	a
G4P62_001664	603.179	64.2004	1.14568e-14	4.92688e-13	a
G4P62_001672	101.302	33.7524	4.68561e-08	4.73381e-07	a
G4P62_001679	2578.4	54.8138	1.2512e-12	3.62402e-11	a
G4P62_001693	383.73	47.2983	5.36162e-11	1.06002e-09	a
G4P62_001739	542.19	44.0752	2.68648e-10	4.6043e-09	a
G4P62_001755	169.096	41.364	1.04213e-09	1.56394e-08	a
G4P62_001771	1200.81	43.0114	4.57302e-10	7.41623e-09	a
G4P62_001812	164.931	32.5739	8.44614e-08	7.95452e-07	a
G4P62_001813	769.64	35.4962	1.95926e-08	2.17965e-07	a
G4P62_001821	974.608	60.6367	6.80641e-14	2.51254e-12	a
G4P62_001825	434.542	45.2812	1.47001e-10	2.68948e-09	a
G4P62_001839	8239.66	37.9346	5.78901e-09	7.31946e-08	a
G4P62_001841	429.94	39.1175	3.20438e-09	4.29046e-08	a
G4P62_001850	229.218	38.1393	5.22591e-09	6.68353e-08	a
G4P62_001871	780.263	102.171	6.51473e-23	1.4952e-20	a
G4P62_001872	1145.67	40.55	1.56557e-09	2.24877e-08	a
G4P62_001873	603.083	44.0131	2.77129e-10	4.71142e-09	a
G4P62_001877	242.087	36.5743	1.14286e-08	1.34513e-07	a
G4P62_001891	277.288	68.6453	1.24125e-15	6.5687e-14	a
G4P62_001903	188.646	117.852	2.56274e-26	1.34746e-23	a
G4P62_001932	204.724	41.131	1.17092e-09	1.73016e-08	a
G4P62_001950	2353.23	36.0871	1.45812e-08	1.68058e-07	a
G4P62_001977	126.039	33.1236	6.41669e-08	6.25812e-07	a
G4P62_001992	193.146	49.8724	1.48031e-11	3.35372e-10	a
G4P62_001994	200.84	56.1549	6.39915e-13	1.96678e-11	a
G4P62_002005	18.8572	44.3628	2.32674e-10	4.05355e-09	a
G4P62_002023	367.097	35.2452	2.22124e-08	2.44279e-07	a
G4P62_002043	767.404	38.9424	3.49752e-09	4.62431e-08	a
G4P62_002059	629.376	39.9372	2.12689e-09	2.95845e-08	a
G4P62_002061	456.055	87.3115	1.09785e-19	1.36463e-17	a
G4P62_002068	1837.9	37.3881	7.60793e-09	9.36685e-08	a
G4P62_002118	1125.3	38.3778	4.63829e-09	6.00981e-08	a
G4P62_002169	1196.45	34.6609	2.97491e-08	3.15654e-07	a
G4P62_002179	287.519	32.9666	6.94047e-08	6.71007e-07	a
G4P62_002187	279.149	34.565	3.12105e-08	3.2967e-07	a
G4P62_002202	302.665	34.832	2.73106e-08	2.93468e-07	a
G4P62_002269	601.633	42.6639	5.44077e-10	8.69e-09	a
G4P62_002273	177.056	44.7648	1.90301e-10	3.38803e-09	a
G4P62_002301	602.87	54.4757	1.48164e-12	4.22769e-11	a
G4P62_002305	349.917	61.3706	4.7157e-14	1.80712e-12	a
G4P62_002342	299.901	38.078	5.38843e-09	6.87472e-08	a
G4P62_002392	51.29	56.3803	5.71719e-13	1.78051e-11	a
G4P62_002394	246.758	44.5226	2.148e-10	3.78273e-09	a
G4P62_002407	295.435	35.5589	1.89878e-08	2.12131e-07	a
G4P62_002413	1576.96	45.2796	1.47116e-10	2.68948e-09	a
G4P62_002449	782.655	38.8615	3.64196e-09	4.80025e-08	a
G4P62_002459	433.093	46.4075	8.37046e-11	1.60675e-09	a
G4P62_002471	106.938	35.8503	1.64139e-08	1.86936e-07	a
G4P62_002476	467.231	51.6065	6.21997e-12	1.53968e-10	a
G4P62_002489	71.6988	43.503	3.57631e-10	5.95065e-09	a
G4P62_002517	993.723	59.3486	1.29604e-13	4.5383e-12	a
G4P62_002519	331.472	33.7027	4.80349e-08	4.84132e-07	a
G4P62_002520	742.541	42.3672	6.31062e-10	9.95137e-09	a
G4P62_002522	312.651	50.5	1.08159e-11	2.55455e-10	a
G4P62_002543	93.1913	42.2903	6.55815e-10	1.02879e-08	a
G4P62_002560	112.199	36.4712	1.20329e-08	1.40918e-07	a
G4P62_002604	260.521	48.8879	2.4217e-11	5.26973e-10	a
G4P62_002623	65.5124	39.1378	3.17209e-09	4.24991e-08	a
G4P62_002628	351.968	61.2297	5.05985e-14	1.91811e-12	a
G4P62_002639	1069.26	54.2341	1.67191e-12	4.68202e-11	a
G4P62_002663	375.019	52.8079	3.41123e-12	8.86697e-11	a
G4P62_002673	989.592	40.7928	1.38664e-09	2.01506e-08	a
G4P62_002728	608.557	34.7475	2.84892e-08	3.03967e-07	a
G4P62_002737	131.285	42.5882	5.65057e-10	8.97756e-09	a
G4P62_002747	24111.1	44.8506	1.82314e-10	3.26233e-09	a
G4P62_002782	215.623	40.1385	1.92327e-09	2.70191e-08	a
G4P62_002797	551.576	53.3088	2.65551e-12	7.14478e-11	a
G4P62_002818	887.395	50.3163	1.18566e-11	2.75415e-10	a
G4P62_002867	1395.16	38.9981	3.40145e-09	4.51992e-08	a
G4P62_002882	441.303	42.5914	5.64165e-10	8.97013e-09	a
G4P62_002886	2758.13	36.581	1.13902e-08	1.3421e-07	a
G4P62_002897	902.531	39.0841	3.25828e-09	4.34609e-08	a
G4P62_002949	373.446	54.4055	1.5346e-12	4.33197e-11	a
G4P62_002953	915.171	49.4889	1.79318e-11	4.00667e-10	a
G4P62_002961	328.382	33.8163	4.5382e-08	4.60471e-07	a
G4P62_002991	683.501	36.3166	1.30001e-08	1.51155e-07	a
G4P62_002992	198.602	34.5531	3.13968e-08	3.31472e-07	a
G4P62_003038	11884.9	61.5916	4.22239e-14	1.63889e-12	a
G4P62_003040	474.52	44.0401	2.73409e-10	4.67073e-09	a
G4P62_003048	2109.47	74.2499	7.53089e-17	5.14611e-15	a
G4P62_003102	122.128	41.9263	7.86706e-10	1.21162e-08	a
G4P62_003116	66.3217	70.6406	4.57701e-16	2.59098e-14	a
G4P62_003131	113.925	66.6401	3.38279e-15	1.63077e-13	a
G4P62_003132	309.204	39.6056	2.51052e-09	3.42882e-08	a
G4P62_003137	295.847	33.162	6.29458e-08	6.16466e-07	a
G4P62_003138	711.475	34.2812	3.59697e-08	3.72122e-07	a
G4P62_003174	4927.03	85.6691	2.49566e-19	2.89416e-17	a
G4P62_003180	1916.65	56.0438	6.76456e-13	2.06109e-11	a
G4P62_003191	2444.42	205.384	2.5206e-45	2.66112e-41	a
G4P62_003271	1747.14	45.9568	1.04859e-10	1.97159e-09	a
G4P62_003289	402.251	40.439	1.65497e-09	2.35954e-08	a
G4P62_003294	862.019	92.5452	8.01809e-21	1.22683e-18	a
G4P62_003310	1988.27	46.7655	6.99839e-11	1.3557e-09	a
G4P62_003318	827.855	47.4705	4.91948e-11	9.81804e-10	a
G4P62_003332	386.106	33.794	4.58918e-08	4.65197e-07	a
G4P62_003392	807.036	67.1749	2.5891e-15	1.27433e-13	a
G4P62_003400	254.66	38.2489	4.94718e-09	6.37338e-08	a
G4P62_003401	1336.88	69.3828	8.58461e-16	4.69278e-14	a
G4P62_003423	371.815	41.1474	1.16134e-09	1.7172e-08	a
G4P62_003435	54.0212	45.0748	1.62982e-10	2.94134e-09	a
G4P62_003438	1021.09	43.3392	3.88164e-10	6.38821e-09	a
G4P62_003461	369.303	47.2167	5.58514e-11	1.1001e-09	a
G4P62_003468	14188.3	117.873	2.53648e-26	1.34746e-23	a
G4P62_003484	1029.68	51.4774	6.63473e-12	1.62898e-10	a
G4P62_003501	699.882	36.9143	9.6419e-09	1.16137e-07	a
G4P62_003514	51.0284	40.8711	1.33336e-09	1.94568e-08	a
G4P62_003529	79910.1	54.9969	1.14174e-12	3.34832e-11	a
G4P62_003530	19292.3	32.5624	8.49498e-08	7.99163e-07	a
G4P62_003558	767.307	43.2615	4.03547e-10	6.62074e-09	a
G4P62_003587	356.021	40.8735	1.33181e-09	1.94475e-08	a
G4P62_003602	1450.89	52.9458	3.18393e-12	8.34104e-11	a
G4P62_003606	416.662	86.6	1.56691e-19	1.91143e-17	a
G4P62_003625	15.0124	32.3143	9.61677e-08	8.93348e-07	a
G4P62_003644	798.461	32.263	9.8669e-08	9.14171e-07	a
G4P62_003660	79.4011	68.6604	1.23192e-15	6.53568e-14	a
G4P62_003691	67.4907	45.3673	1.40806e-10	2.59208e-09	a
G4P62_003708	1231.43	40.1862	1.87792e-09	2.64525e-08	a
G4P62_003731	172.328	39.7797	2.30118e-09	3.16544e-08	a
G4P62_003743	858.417	76.0913	2.99906e-17	2.21416e-15	a
G4P62_003758	3019.16	48.3356	3.19197e-11	6.70631e-10	a
G4P62_003813	680.457	33.1744	6.25569e-08	6.13796e-07	a
G4P62_003818	1330.34	75.319	4.41259e-17	3.15837e-15	a
G4P62_003867	1026.72	49.7901	1.54249e-11	3.48383e-10	a
G4P62_003889	901.98	34.4711	3.27111e-08	3.43117e-07	a
G4P62_003902	1848.35	33.8166	4.53761e-08	4.60471e-07	a
G4P62_003908	731.414	42.9519	4.71111e-10	7.62261e-09	a
G4P62_003919	638.099	83.7674	6.45859e-19	6.81866e-17	a
G4P62_003970	265.441	84.9075	3.65226e-19	4.08029e-17	a
G4P62_004022	5233.05	54.4312	1.51498e-12	4.28804e-11	a
G4P62_004028	56.4169	51.2964	7.26336e-12	1.76689e-10	a
G4P62_004051	898.966	33.0039	6.81222e-08	6.6012e-07	a
G4P62_004070	1986.25	80.5414	3.24085e-18	2.93693e-16	a
G4P62_004079	1923.32	47.6668	4.45943e-11	9.002e-10	a
G4P62_004084	316.652	32.0832	1.0795e-07	9.92323e-07	a
G4P62_004097	112.077	48.6641	2.70841e-11	5.77075e-10	a
G4P62_004123	308.578	32.6442	8.15452e-08	7.71428e-07	a
G4P62_004157	146.212	33.5783	5.11171e-08	5.12993e-07	a
G4P62_004174	781.308	44.9811	1.708e-10	3.06931e-09	a
G4P62_004192	1300.93	51.9449	5.25187e-12	1.3139e-10	a
G4P62_004208	483.05	44.0162	2.76696e-10	4.71124e-09	a
G4P62_004224	519.935	42.16	6.99954e-10	1.08994e-08	a
G4P62_004235	1028.89	32.2172	1.00956e-07	9.32905e-07	a
G4P62_004243	26.946	40.5725	1.54805e-09	2.22968e-08	a
G4P62_004275	109.67	46.6156	7.54301e-11	1.45586e-09	a
G4P62_004276	2377.9	122.499	2.5106e-27	1.71005e-24	a
G4P62_004323	673.325	49.7127	1.60336e-11	3.60928e-10	a
G4P62_004326	743.945	38.3774	4.63935e-09	6.00981e-08	a
G4P62_004330	1028.81	64.5316	9.70844e-15	4.22668e-13	a
G4P62_004356	2541.05	34.5386	3.16258e-08	3.33223e-07	a
G4P62_004387	325.142	47.0007	6.22209e-11	1.2176e-09	a
G4P62_004394	929.472	40.8842	1.32467e-09	1.93567e-08	a
G4P62_004395	66.1684	47.5105	4.82202e-11	9.66005e-10	a
G4P62_004397	4.51892	35.1849	2.28928e-08	2.50976e-07	a
G4P62_004401	611.435	51.9879	5.14014e-12	1.29207e-10	a
G4P62_004482	252.684	51.3214	7.17287e-12	1.74689e-10	a
G4P62_004502	1353.54	131.018	3.54617e-29	3.56558e-26	a
G4P62_004516	383.861	43.1008	4.37295e-10	7.11362e-09	a
G4P62_004531	97.6847	61.8791	3.657e-14	1.42996e-12	a
G4P62_004549	698.867	41.045	1.22232e-09	1.79964e-08	a
G4P62_004558	68.762	64.8485	8.28563e-15	3.68318e-13	a
G4P62_004589	964.818	34.9951	2.51716e-08	2.72983e-07	a
G4P62_004593	542.248	41.3605	1.04397e-09	1.56558e-08	a
G4P62_004594	643.647	36.8624	9.89559e-09	1.18854e-07	a
G4P62_004620	625.451	35.3955	2.06047e-08	2.28382e-07	a
G4P62_004626	65.3148	35.6347	1.82821e-08	2.05006e-07	a
G4P62_004632	162.037	48.3579	3.15662e-11	6.63864e-10	a
G4P62_004633	1653.53	71.9832	2.33913e-16	1.42337e-14	a
G4P62_004690	683.164	56.7799	4.68164e-13	1.47542e-11	a
G4P62_004701	12604	78.5273	8.872e-18	7.37529e-16	a
G4P62_004715	763.643	65.4285	6.19972e-15	2.85201e-13	a
G4P62_004759	679.405	47.4837	4.88713e-11	9.7627e-10	a
G4P62_004765	1018.41	33.8572	4.44629e-08	4.52668e-07	a
G4P62_004777	929.085	33.2576	6.00071e-08	5.9208e-07	a
G4P62_004779	698.887	35.0845	2.40717e-08	2.6281e-07	a
G4P62_004792	100.578	36.0487	1.48635e-08	1.71032e-07	a
G4P62_004803	162.882	45.2417	1.49927e-10	2.7385e-09	a
G4P62_004866	275.2	102.027	6.99889e-23	1.53939e-20	a
G4P62_004867	8.83644	39.8135	2.26258e-09	3.12455e-08	a
G4P62_004909	243.697	36.9314	9.55981e-09	1.1528e-07	a
G4P62_004916	895.708	63.4634	1.65612e-14	6.85668e-13	a
G4P62_004918	478.505	57.2951	3.61851e-13	1.17365e-11	a
G4P62_004944	336.523	37.1392	8.61643e-09	1.05044e-07	a
G4P62_005001	116.958	37.0885	8.8377e-09	1.07493e-07	a
G4P62_005004	962.927	54.3438	1.5827e-12	4.4499e-11	a
G4P62_005006	959.414	58.5928	1.89119e-13	6.40971e-12	a
G4P62_005022	96.6616	43.7866	3.10355e-10	5.23414e-09	a
G4P62_005076	980.98	37.5757	6.92696e-09	8.59358e-08	a
G4P62_005086	144.402	64.8611	8.23378e-15	3.66786e-13	a
G4P62_005136	70.0383	37.2381	8.20065e-09	1.00381e-07	a
G4P62_005172	448.061	48.1648	3.4766e-11	7.24399e-10	a
G4P62_005173	1078.51	35.6366	1.82649e-08	2.04922e-07	a
G4P62_005178	1172.93	40.6556	1.4851e-09	2.15074e-08	a
G4P62_005179	2827.6	50.4103	1.1312e-11	2.65097e-10	a
G4P62_005180	185.446	80.4066	3.46673e-18	3.12821e-16	a
G4P62_005233	381.568	39.5817	2.54064e-09	3.46548e-08	a
G4P62_005248	2279.34	37.8358	6.08226e-09	7.63992e-08	a
G4P62_005276	998.561	35.504	1.9517e-08	2.17353e-07	a
G4P62_005291	7162.77	48.9903	2.30092e-11	5.04505e-10	a
G4P62_005294	106.273	41.2377	1.11004e-09	1.64828e-08	a
G4P62_005304	1112	34.702	2.91443e-08	3.10016e-07	a
G4P62_005308	4518.75	49.4116	1.86383e-11	4.12956e-10	a
G4P62_005325	962.69	51.3392	7.10952e-12	1.73346e-10	a
G4P62_005332	20.0567	65.7838	5.1907e-15	2.44102e-13	a
G4P62_005339	88.9843	59.5315	1.18279e-13	4.16245e-12	a
G4P62_005349	42.9489	52.7278	3.55067e-12	9.17654e-11	a
G4P62_005356	692.829	42.3728	6.29294e-10	9.93833e-09	a
G4P62_005373	37.1649	38.426	4.52782e-09	5.87977e-08	a
G4P62_005412	694.796	44.0317	2.74563e-10	4.68665e-09	a
G4P62_005419	769.758	36.4112	1.23995e-08	1.44888e-07	a
G4P62_005435	462.55	36.358	1.27336e-08	1.48383e-07	a
G4P62_005481	14127.1	104.166	2.40268e-23	5.96855e-21	a
G4P62_005494	355.633	40.0421	2.01817e-09	2.81837e-08	a
G4P62_005503	75.1153	47.728	4.32509e-11	8.77275e-10	a
G4P62_005540	1404.3	39.9639	2.09875e-09	2.92509e-08	a
G4P62_005541	154.842	43.4889	3.60176e-10	5.98357e-09	a
G4P62_005542	164.45	60.5365	7.15607e-14	2.6314e-12	a
G4P62_005598	1460.25	40.4345	1.65864e-09	2.36316e-08	a
G4P62_005615	93.7106	39.3348	2.87442e-09	3.88314e-08	a
G4P62_005628	1036.87	32.8989	7.17936e-08	6.91571e-07	a
G4P62_005666	155.823	41.7973	8.39129e-10	1.28283e-08	a
G4P62_005668	765.905	46.2009	9.281e-11	1.77026e-09	a
G4P62_005671	1351.41	35.6334	1.82937e-08	2.05027e-07	a
G4P62_005696	2761.68	58.6846	1.80637e-13	6.16178e-12	a
G4P62_005703	1176.04	32.1639	1.0368e-07	9.55218e-07	a
G4P62_005714	600.95	32.5747	8.44311e-08	7.95452e-07	a
G4P62_005845	93.4128	37.8832	5.93986e-09	7.48331e-08	a
G4P62_005856	591.837	43.9931	2.79914e-10	4.75494e-09	a
G4P62_005916	899.995	66.721	3.2487e-15	1.56971e-13	a
G4P62_005918	191.641	52.9859	3.12071e-12	8.21618e-11	a
G4P62_005923	260.743	34.6869	2.93648e-08	3.12047e-07	a
G4P62_005968	9.7888	40.4491	1.64658e-09	2.34916e-08	a
G4P62_005976	79.0154	38.9856	3.4229e-09	4.53944e-08	a
G4P62_005999	1132.24	34.4515	3.3034e-08	3.45817e-07	a
G4P62_006000	317.648	39.7581	2.32612e-09	3.19558e-08	a
G4P62_006006	681.95	35.8785	1.61836e-08	1.84512e-07	a
G4P62_006008	173.296	33.6702	4.8821e-08	4.91352e-07	a
G4P62_006028	3319.39	55.9281	7.16746e-13	2.17444e-11	a
G4P62_006042	237.877	52.0325	5.02683e-12	1.26509e-10	a
G4P62_006084	1318.43	46.0126	1.01976e-10	1.92768e-09	a
G4P62_006112	867.019	53.621	2.27164e-12	6.24553e-11	a
G4P62_006125	1279.63	37.689	6.54537e-09	8.16817e-08	a
G4P62_006151	153.592	38.2458	4.95487e-09	6.3794e-08	a
G4P62_006260	56.4034	95.6319	1.71314e-21	2.96499e-19	a
G4P62_006271	1558.11	45.3174	1.44359e-10	2.64596e-09	a
G4P62_006282	241.939	34.2904	3.58043e-08	3.70774e-07	a
G4P62_006287	678.596	36.9844	9.3096e-09	1.12649e-07	a
G4P62_006297	12492.7	51.1388	7.85859e-12	1.89639e-10	a
G4P62_006301	366.164	88.9329	4.88055e-20	6.2837e-18	a
G4P62_006304	527.215	34.2666	3.62324e-08	3.74152e-07	a
G4P62_006328	261.162	38.2094	5.04589e-09	6.48077e-08	a
G4P62_006384	7305.61	50.0806	1.33394e-11	3.05822e-10	a
G4P62_006391	647.258	64.9604	7.83475e-15	3.51233e-13	a
G4P62_006412	4817.48	54.791	1.26557e-12	3.66062e-11	a
G4P62_006423	116.392	38.9984	3.40097e-09	4.51992e-08	a
G4P62_006497	362.934	45.0656	1.63734e-10	2.95239e-09	a
G4P62_006499	1054.47	33.4153	5.54562e-08	5.51299e-07	a
G4P62_006508	49.7424	37.6142	6.79476e-09	8.45441e-08	a
G4P62_006541	955.489	41.6471	9.0456e-10	1.37508e-08	a
G4P62_006572	448.705	56.2146	6.211e-13	1.91453e-11	a
G4P62_006581	70.1018	56.3381	5.83911e-13	1.81313e-11	a
G4P62_006624	58.8053	39.8218	2.25329e-09	3.11843e-08	a
G4P62_006668	526.047	42.5711	5.69904e-10	9.03418e-09	a
G4P62_006705	503.529	42.7657	5.17064e-10	8.29621e-09	a
G4P62_006716	1912.44	48.6725	2.69718e-11	5.75261e-10	a
G4P62_006722	441.727	59.1979	1.39744e-13	4.86111e-12	a
G4P62_006736	192.75	72.3159	1.98067e-16	1.241e-14	a
G4P62_006772	1796.94	86.3371	1.78704e-19	2.13849e-17	a
G4P62_006783	1431.25	97.2067	7.79516e-22	1.4696e-19	a
G4P62_006807	383.276	37.2925	7.98053e-09	9.77998e-08	a
G4P62_006855	111.696	37.8514	6.03504e-09	7.58511e-08	a
G4P62_006909	492.458	43.4517	3.66926e-10	6.07182e-09	a
G4P62_006939	819.157	51.4452	6.74253e-12	1.65353e-10	a
G4P62_006964	2437.79	65.721	5.35621e-15	2.51325e-13	a
G4P62_006968	81.5942	54.5201	1.44916e-12	4.14622e-11	a
G4P62_006971	2667.16	36.1119	1.44016e-08	1.66203e-07	a
G4P62_006974	103.348	46.9564	6.36139e-11	1.24027e-09	a
G4P62_006978	331.779	33.048	6.66388e-08	6.46635e-07	a
G4P62_006991	2659.65	84.8752	3.71177e-19	4.12494e-17	a
G4P62_007018	86.6308	32.837	7.40518e-08	7.10757e-07	a
G4P62_007023	885.473	60.5337	7.16578e-14	2.6314e-12	a
G4P62_007051	272.011	33.7061	4.79534e-08	4.83541e-07	a
G4P62_007087	3120.43	51.4419	6.75348e-12	1.65429e-10	a
G4P62_007095	158.254	36.417	1.23637e-08	1.44551e-07	a
G4P62_007101	434.584	45.4918	1.32307e-10	2.43775e-09	a
G4P62_007132	681.02	32.4531	8.9722e-08	8.39008e-07	a
G4P62_007136	397.229	49.9142	1.44965e-11	3.29132e-10	a
G4P62_007189	248.902	42.7045	5.33146e-10	8.54125e-09	a
G4P62_007202	525.215	42.6119	5.58393e-10	8.89176e-09	a
G4P62_007211	396.825	48.1158	3.56284e-11	7.39719e-10	a
G4P62_007221	103.519	44.9956	1.69566e-10	3.05234e-09	a
G4P62_007285	325.983	38.1659	5.1568e-09	6.60314e-08	a
G4P62_007294	2437.04	36.3395	1.28519e-08	1.49596e-07	a
G4P62_007296	200.1	33.1288	6.39975e-08	6.24449e-07	a
G4P62_007310	1459.05	81.5519	1.95542e-18	1.9027e-16	a
G4P62_007323	709.061	33.0605	6.62216e-08	6.43474e-07	a
G4P62_007339	2445.67	74.431	6.87869e-17	4.74652e-15	a
G4P62_007393	1041.34	50.2833	1.20536e-11	2.79376e-10	a
G4P62_007397	448.364	48.8332	2.4889e-11	5.39006e-10	a
G4P62_007409	582.876	32.3159	9.60912e-08	8.9303e-07	a
G4P62_007410	328.481	47.1576	5.75247e-11	1.12884e-09	a
G4P62_007421	586.354	77.339	1.60711e-17	1.2662e-15	a
G4P62_007426	1030.47	44.2321	2.48383e-10	4.29534e-09	a
G4P62_007441	3882.89	80.184	3.87491e-18	3.45227e-16	a
G4P62_007444	520.791	85.4358	2.80448e-19	3.17563e-17	a
G4P62_007471	637.58	45.6894	1.1986e-10	2.23178e-09	a
G4P62_007502	718.875	37.7961	6.20421e-09	7.78384e-08	a
G4P62_007534	552.63	46.3934	8.42949e-11	1.61661e-09	a
G4P62_007572	1108.19	55.3312	9.66e-13	2.86476e-11	a
G4P62_007582	868.564	43.0967	4.38199e-10	7.12284e-09	a
G4P62_007588	715.263	34.7571	2.83531e-08	3.02821e-07	a
G4P62_007606	4496.17	64.8417	8.31385e-15	3.68424e-13	a
G4P62_007633	359.722	34.9064	2.63127e-08	2.83755e-07	a
G4P62_007642	1348.69	64.5543	9.59856e-15	4.18747e-13	a
G4P62_007647	296.898	100.418	1.56465e-22	3.23897e-20	a
G4P62_007654	3061.28	45.9587	1.04762e-10	1.97159e-09	a
G4P62_007655	780.062	36.9707	9.37357e-09	1.1322e-07	a
G4P62_007672	507.736	137.926	1.12131e-30	1.47978e-27	a
G4P62_007704	1065.66	51.7243	5.86426e-12	1.45504e-10	a
G4P62_007744	673.996	35.6393	1.824e-08	2.04751e-07	a
G4P62_007751	1011.98	47.8976	3.97347e-11	8.14561e-10	a
G4P62_007756	493.096	43.4287	3.71179e-10	6.12779e-09	a
G4P62_007760	337.877	35.2868	2.17551e-08	2.40251e-07	a
G4P62_007764	615.925	47.5546	4.71687e-11	9.45838e-10	a
G4P62_007765	509.974	45.5179	1.30593e-10	2.4146e-09	a
G4P62_007788	983.105	37.9664	5.69768e-09	7.21695e-08	a
G4P62_007802	4184.99	79.0925	6.68777e-18	5.69404e-16	a
G4P62_007811	533.967	68.7454	1.18068e-15	6.29548e-14	a
G4P62_007818	203.651	35.9322	1.57549e-08	1.80032e-07	a
G4P62_007819	512.338	39.6818	2.41657e-09	3.30907e-08	a
G4P62_007848	187.005	39.1704	3.12066e-09	4.18632e-08	a
G4P62_007857	1226.02	70.9946	3.83453e-16	2.21219e-14	a
G4P62_007945	708.679	46.5216	7.90608e-11	1.52315e-09	a
G4P62_007949	258.898	33.0991	6.49579e-08	6.32942e-07	a
G4P62_007963	75.9685	47.9245	3.92031e-11	8.0601e-10	a
G4P62_007984	3808.18	69.8394	6.83244e-16	3.7965e-14	a
G4P62_007985	1399.95	45.1418	1.57609e-10	2.85903e-09	a
G4P62_008004	312.923	49.4189	1.85702e-11	4.1188e-10	a
G4P62_008045	1432.63	40.5087	1.59827e-09	2.29107e-08	a
G4P62_008060	33.6444	35.4636	1.99151e-08	2.21087e-07	a
G4P62_008099	539.4	40.555	1.56169e-09	2.24472e-08	a
G4P62_008115	1159.98	38.2351	4.98152e-09	6.40518e-08	a
G4P62_008119	769.75	35.7626	1.71497e-08	1.94372e-07	a
G4P62_008124	1139.35	55.3413	9.61157e-13	2.85783e-11	a
G4P62_008180	321.102	111.279	6.8561e-25	2.41277e-22	a
G4P62_008219	783.267	36.8577	9.91844e-09	1.19061e-07	a
G4P62_008234	635.487	33.4319	5.49987e-08	5.47265e-07	a
G4P62_008256	355.431	41.8631	8.11988e-10	1.24601e-08	a
G4P62_008296	671.518	32.4341	9.0578e-08	8.45515e-07	a
G4P62_008316	109.412	66.8675	3.01936e-15	1.46561e-13	a
G4P62_008318	10221.7	142.101	1.39073e-31	2.44711e-28	a
G4P62_008339	742.95	40.5018	1.60378e-09	2.29741e-08	a
G4P62_008362	663.154	79.6962	4.94527e-18	4.31485e-16	a
G4P62_008373	171.103	37.5764	6.92448e-09	8.59358e-08	a
G4P62_008399	141.921	52.2692	4.46565e-12	1.1306e-10	a
G4P62_008412	10339.6	35.9774	1.5403e-08	1.76661e-07	a
G4P62_008420	10195	152.49	7.71141e-34	5.42754e-30	a
G4P62_008421	7378.71	63.5797	1.56255e-14	6.52042e-13	a
G4P62_008454	10567.9	94.2807	3.3668e-21	5.5539e-19	a
G4P62_008458	238.108	34.3783	3.42642e-08	3.56925e-07	a
G4P62_008463	986.421	40.5598	1.55795e-09	2.24088e-08	a
G4P62_008477	69208.3	95.9142	1.48766e-21	2.64828e-19	a
G4P62_008494	163.803	56.5142	5.34671e-13	1.67006e-11	a
G4P62_008519	483.047	33.8187	4.53274e-08	4.6036e-07	a
G4P62_008542	269.619	33.3023	5.8682e-08	5.80089e-07	a
G4P62_008548	484.247	40.157	1.90552e-09	2.68139e-08	a
G4P62_008610	5078.01	37.0593	8.96737e-09	1.08945e-07	a
G4P62_008623	306.297	56.0406	6.77555e-13	2.06147e-11	a
G4P62_008632	363.019	39.0064	3.38742e-09	4.50979e-08	a
G4P62_008669	420.506	32.8782	7.25435e-08	6.98157e-07	a
G4P62_008693	208.533	53.2721	2.70471e-12	7.24744e-11	a
G4P62_008699	713.8	40.1564	1.90612e-09	2.68139e-08	a
G4P62_008700	367.363	45.1614	1.56075e-10	2.83364e-09	a
G4P62_008776	228.103	35.9078	1.59484e-08	1.82027e-07	a
G4P62_008784	1028.17	34.8013	2.77332e-08	2.97102e-07	a
G4P62_008789	454.092	37.7632	6.30714e-09	7.89421e-08	a
G4P62_008842	862.545	43.5004	3.58097e-10	5.95372e-09	a
G4P62_008875	919.583	33.239	6.05673e-08	5.96213e-07	a
G4P62_008898	1581.67	37.1248	8.67869e-09	1.05742e-07	a
G4P62_008922	452.638	72.3731	1.92477e-16	1.20957e-14	a
G4P62_008954	173.118	48.9358	2.36445e-11	5.17361e-10	a
G4P62_009003	209.977	34.8232	2.74309e-08	2.9446e-07	a
G4P62_009027	1697.61	39.3103	2.90983e-09	3.92594e-08	a
G4P62_009062	5393.2	49.5646	1.72661e-11	3.87845e-10	a
G4P62_009078	282.75	32.8299	7.43147e-08	7.12604e-07	a
G4P62_009081	20836.7	68.0849	1.64268e-15	8.45982e-14	a
G4P62_009085	9838.35	85.659	2.50832e-19	2.89416e-17	a
G4P62_009103	4052.26	63.8367	1.37418e-14	5.83818e-13	a
G4P62_009161	78.996	44.1232	2.6228e-10	4.50248e-09	a
G4P62_009173	503.64	56.9579	4.28294e-13	1.36402e-11	a
G4P62_009176	652.428	38.8729	3.62123e-09	4.7759e-08	a
G4P62_009182	124.975	33.3971	5.59639e-08	5.55822e-07	a
G4P62_009209	1061.47	40.3554	1.72559e-09	2.44865e-08	a
G4P62_009232	1007.44	47.5925	4.62828e-11	9.29839e-10	a
G4P62_009252	429.537	36.348	1.2798e-08	1.49051e-07	a
G4P62_009272	519.308	39.901	2.16573e-09	3.00851e-08	a
G4P62_009287	142.49	45.3188	1.44259e-10	2.64596e-09	a
G4P62_009289	100.739	40.188	1.87628e-09	2.6447e-08	a
G4P62_009294	26672	73.8509	9.19356e-17	6.12373e-15	a
G4P62_009298	871.858	63.0893	1.9968e-14	8.17101e-13	a
G4P62_009349	860.366	70.7812	4.26635e-16	2.42814e-14	a
G4P62_009377	825.252	38.1513	5.1946e-09	6.64751e-08	a
G4P62_009415	144.354	39.0865	3.25449e-09	4.34609e-08	a
G4P62_009432	2376.63	50.943	8.66714e-12	2.07021e-10	a
G4P62_009433	3025.93	37.1497	8.57147e-09	1.04677e-07	a
G4P62_009469	266.583	33.0434	6.67902e-08	6.47806e-07	a
G4P62_009471	952.582	53.9051	1.97087e-12	5.46129e-11	a
G4P62_009571	8647.62	39.9103	2.15565e-09	2.99648e-08	a
G4P62_009581	317.888	65.4997	5.9829e-15	2.77055e-13	a
G4P62_009582	6302.61	71.2382	3.39487e-16	1.98567e-14	a
G4P62_009584	2475.14	149.047	4.3127e-33	1.13828e-29	a
G4P62_009630	95.166	33.4216	5.52836e-08	5.49841e-07	a
G4P62_009645	783.206	48.449	3.01608e-11	6.36882e-10	a
G4P62_009679	580.146	44.617	2.04901e-10	3.63264e-09	a
G4P62_009698	1078.29	44.2234	2.49463e-10	4.31048e-09	a
G4P62_009717	559.705	50.4923	1.08578e-11	2.55825e-10	a
G4P62_009772	824.928	42.5719	5.69665e-10	9.03418e-09	a
G4P62_009797	600.865	34.3744	3.43314e-08	3.57449e-07	a
G4P62_009802	1560.94	44.8138	1.85694e-10	3.31439e-09	a
G4P62_009835	99.4813	32.5796	8.42219e-08	7.93905e-07	a
G4P62_009842	437.621	38.5326	4.29297e-09	5.59302e-08	a
G4P62_009852	226.037	51.0899	8.05319e-12	1.94113e-10	a
G4P62_009883	2398.42	74.1947	7.7417e-17	5.2731e-15	a
G4P62_009910	204.183	34.648	2.99422e-08	3.17306e-07	a
G4P62_009917	385.669	59.3322	1.30669e-13	4.56047e-12	a
G4P62_009946	582.127	36.5289	1.16908e-08	1.37228e-07	a
G4P62_009956	7733.05	46.1329	9.60222e-11	1.8233e-09	a
G4P62_010079	525.426	92.3238	8.95637e-21	1.35081e-18	a
G4P62_010081	381.191	44.1569	2.57901e-10	4.43091e-09	a
G4P62_010093	633.587	34.8101	2.76114e-08	2.96061e-07	a
G4P62_010107	481.939	34.9247	2.60728e-08	2.81888e-07	a
G4P62_010130	464.872	65.0801	7.37967e-15	3.34382e-13	a
G4P62_010131	2055.17	35.6106	1.85034e-08	2.07157e-07	a
G4P62_010153	789.519	35.1068	2.38039e-08	2.60425e-07	a
G4P62_010166	263.948	44.1841	2.54417e-10	4.3746e-09	a
G4P62_010219	538.092	39.2072	3.06381e-09	4.11791e-08	a
G4P62_010224	639.169	47.9526	3.86571e-11	7.95561e-10	a
G4P62_010242	3235.39	37.6543	6.65982e-09	8.30119e-08	a
G4P62_010252	1280.99	33.8325	4.50168e-08	4.57425e-07	a
G4P62_010255	90.5076	42.3122	6.48656e-10	1.01908e-08	a
G4P62_010276	340.661	41.574	9.38238e-10	1.42014e-08	a
G4P62_010316	420.683	39.3681	2.82704e-09	3.82402e-08	a
G4P62_010323	236.122	36.7897	1.02617e-08	1.22624e-07	a
G4P62_010389	567.394	35.5786	1.88023e-08	2.1017e-07	a
G4P62_010401	558.246	46.321	8.74043e-11	1.6732e-09	a
G4P62_010420	228.402	41.1045	1.18648e-09	1.7507e-08	a
G4P62_010445	14.5144	40.3669	1.71571e-09	2.4379e-08	a
G4P62_010452	555.696	45.5911	1.25901e-10	2.34014e-09	a
G4P62_010485	235.82	47.3634	5.18994e-11	1.03091e-09	a
G4P62_010529	392.761	32.603	8.32422e-08	7.86073e-07	a
G4P62_010531	598.662	40.5136	1.59432e-09	2.28695e-08	a
G4P62_010538	396.433	41.5448	9.52075e-10	1.44005e-08	a
G4P62_010562	4082.84	40.8441	1.35153e-09	1.97082e-08	a
G4P62_010563	4552.24	38.1756	5.13188e-09	6.57921e-08	a
G4P62_010583	867.068	35.9367	1.57197e-08	1.79806e-07	a
G4P62_010598	1856.91	34.6964	2.92268e-08	3.10738e-07	a
G4P62_010608	677.799	33.291	5.90125e-08	5.8281e-07	a
G4P62_010620	618.693	35.807	1.67731e-08	1.90411e-07	a
G4P62_010624	343.898	41.3526	1.04807e-09	1.57062e-08	a
G4P62_010632	2600.49	32.1605	1.03855e-07	9.56344e-07	a
G4P62_010636	1443.55	40.7364	1.42627e-09	2.06838e-08	a
G4P62_010641	1203.06	72.1996	2.09925e-16	1.29987e-14	a
G4P62_010648	746.324	39.8312	2.24267e-09	3.10722e-08	a
G4P62_010671	433.486	94.141	3.61029e-21	5.9094e-19	a
G4P62_010674	28.4797	74.2555	7.50972e-17	5.14611e-15	a
G4P62_010684	27070.7	82.1521	1.44843e-18	1.46333e-16	a
G4P62_010707	262.448	51.5087	6.53156e-12	1.60739e-10	a
G4P62_010711	1232.42	58.6012	1.88331e-13	6.39326e-12	a
G4P62_010712	329.722	32.642	8.16365e-08	7.71946e-07	a
G4P62_010729	143.503	33.3254	5.80064e-08	5.74274e-07	a
G4P62_010741	493.059	51.5711	6.33118e-12	1.56354e-10	a
G4P62_010802	13.1944	34.4228	3.35103e-08	3.49936e-07	a
G4P62_010809	1199.49	36.0581	1.47943e-08	1.70328e-07	a
G4P62_010829	498.263	32.9522	6.99063e-08	6.7511e-07	a
G4P62_010835	649.773	65.4617	6.09791e-15	2.81129e-13	a
G4P62_010838	244.945	48.2977	3.25302e-11	6.82101e-10	a
G4P62_010869	4186.8	47.2908	5.38197e-11	1.06305e-09	a
G4P62_010886	1040.23	109.195	1.94363e-24	6.12534e-22	a
G4P62_010968	297.623	51.9543	5.22717e-12	1.31083e-10	a
G4P62_010976	1281.45	41.6421	9.06837e-10	1.37754e-08	a
G4P62_010978	12.8846	34.8206	2.74663e-08	2.94691e-07	a
G4P62_010982	1261.79	40.2441	1.82436e-09	2.57792e-08	a
G4P62_010996	468.163	100.661	1.38594e-22	2.89745e-20	a
G4P62_011003	1281.78	86.4978	1.64908e-19	1.98974e-17	a
G4P62_011034	1138.98	33.7227	4.75575e-08	4.80008e-07	a
G4P62_011039	117.829	77.4206	1.5429e-17	1.22475e-15	a
G4P62_011057	160.972	52.2578	4.4913e-12	1.13573e-10	a
G4P62_011099	287.291	52.735	3.5379e-12	9.15475e-11	a
G4P62_011131	606.425	32.3034	9.66948e-08	8.9785e-07	a
G4P62_011137	377.491	32.4576	8.95197e-08	8.38199e-07	a
G4P62_011179	5269.04	41.7695	8.50865e-10	1.29719e-08	a
G4P62_011227	930.983	32.433	9.06266e-08	8.45594e-07	a
G4P62_011252	53.1786	38.9292	3.52077e-09	4.65213e-08	a
G4P62_011341	392.325	52.306	4.38433e-12	1.11268e-10	a
G4P62_011345	181.678	36.3615	1.27117e-08	1.4821e-07	a
G4P62_011351	1665.27	62.1651	3.16977e-14	1.25572e-12	a
G4P62_011354	9747.21	77.1836	1.73695e-17	1.34837e-15	a
G4P62_011384	579.563	38.6279	4.09325e-09	5.35496e-08	a
G4P62_011387	7954.42	40.1015	1.95916e-09	2.74686e-08	a
G4P62_011389	159.831	40.8353	1.35745e-09	1.97673e-08	a
G4P62_011405	435.285	33.5897	5.08255e-08	5.10309e-07	a
G4P62_011419	666.164	76.7338	2.17502e-17	1.66397e-15	a
G4P62_011420	216.382	41.7164	8.73762e-10	1.33113e-08	a
G4P62_011468	253.205	33.3981	5.59362e-08	5.55809e-07	a
G4P62_011494	1098.34	44.0598	2.70736e-10	4.62949e-09	a
G4P62_011515	1681.58	78.6197	8.47143e-18	7.09818e-16	a
G4P62_011540	1374.79	57.1315	3.92695e-13	1.26256e-11	a
G4P62_011575	410.268	50.1993	1.25709e-11	2.90092e-10	a
G4P62_011579	400.786	40.5357	1.57682e-09	2.26339e-08	a
G4P62_011580	172.764	49.5771	1.71583e-11	3.85834e-10	a
G4P62_011606	280.547	39.7896	2.28975e-09	3.15382e-08	a
G4P62_011618	281.425	48.0779	3.63095e-11	7.52381e-10	a
G4P62_011625	503.835	37.6222	6.76787e-09	8.42592e-08	a
G4P62_011631	629.134	34.7213	2.88647e-08	3.07352e-07	a
G4P62_011633	315.738	39.1084	3.21897e-09	4.30726e-08	a
G4P62_011669	400.659	34.0414	4.05514e-08	4.15047e-07	a
G4P62_011677	426.047	44.2174	2.50214e-10	4.31896e-09	a
G4P62_011694	894.806	50.3227	1.18188e-11	2.74947e-10	a
G4P62_011709	171.403	40.912	1.30641e-09	1.91163e-08	a
G4P62_011725	693.126	50.5116	1.07535e-11	2.54266e-10	a
G4P62_011735	729.381	89.9098	2.99462e-20	4.02748e-18	a
G4P62_011750	362.249	47.9658	3.84019e-11	7.9108e-10	a
G4P62_011768	272.476	53.6628	2.22469e-12	6.12443e-11	a
G4P62_011797	851.969	46.1402	9.56721e-11	1.81829e-09	a
G4P62_011811	1434.87	40.28	1.79191e-09	2.53593e-08	a
G4P62_011823	4804.86	71.8251	2.53146e-16	1.53157e-14	a
G4P62_011828	26267.2	52.7133	3.57643e-12	9.22055e-11	a
G4P62_011844	438.973	68.1174	1.61618e-15	8.34368e-14	a
G4P62_011845	581.383	43.7597	3.14566e-10	5.28827e-09	a
G4P62_011877	910.107	57.9225	2.64417e-13	8.75104e-12	a
G4P62_011907	674.726	37.0406	9.05172e-09	1.09799e-07	a
G4P62_011927	923.311	36.8276	1.0069e-08	1.20576e-07	a
G4P62_011936	408.428	33.1392	6.36678e-08	6.22094e-07	a
G4P62_011948	1159.68	47.3726	5.16624e-11	1.02717e-09	a
G4P62_011949	333.989	32.2248	1.00573e-07	9.30176e-07	a
G4P62_011962	164.192	40.5731	1.54765e-09	2.22968e-08	a
G4P62_012013	301.185	41.3472	1.0509e-09	1.57374e-08	a
G4P62_012055	429.905	119.368	1.20108e-26	6.85428e-24	a
G4P62_012078	991.526	41.9991	7.58606e-10	1.17262e-08	a
G4P62_012095	594.278	44.6844	1.98114e-10	3.51527e-09	a
G4P62_012100	2054.26	34.3095	3.54646e-08	3.67436e-07	a
G4P62_012119	432.087	75.9834	3.16533e-17	2.32878e-15	a
G4P62_012124	820.812	39.6619	2.44082e-09	3.33795e-08	a
G4P62_012135	2165.41	84.6146	4.2284e-19	4.62605e-17	a
G4P62_012138	361.31	49.1239	2.15221e-11	4.73867e-10	a
G4P62_012152	5792.48	106.487	7.52755e-24	2.06421e-21	a
G4P62_012177	588.759	38.1676	5.15239e-09	6.6015e-08	a
G4P62_012202	306.496	47.426	5.02998e-11	1.00102e-09	a
G4P62_012216	140.471	36.8268	1.00733e-08	1.20576e-07	a
G4P62_012247	972.948	43.9731	2.82731e-10	4.79893e-09	a
G4P62_012249	509.405	42.6685	5.4282e-10	8.67649e-09	a
G4P62_012297	218.142	61.3227	4.83006e-14	1.84759e-12	a
G4P62_012339	498.4	35.272	2.19169e-08	2.41785e-07	a
G4P62_012341	637.025	40.4599	1.63771e-09	2.33967e-08	a
G4P62_012372	240.915	46.0421	1.00479e-10	1.90109e-09	a
G4P62_012390	53.0982	38.8017	3.75253e-09	4.92753e-08	a
G4P62_012398	98.8712	38.261	4.91745e-09	6.34757e-08	a
G4P62_012408	1749.17	38.8496	3.66366e-09	4.82282e-08	a
G4P62_012446	28.5936	65.7016	5.40845e-15	2.52653e-13	a
G4P62_012449	32.2055	50.3306	1.17718e-11	2.74351e-10	a
G4P62_012463	778.997	33.2023	6.16888e-08	6.06406e-07	a
G4P62_012465	1058.16	39.96	2.10281e-09	2.92688e-08	a
G4P62_012469	1241.51	47.681	4.42803e-11	8.96432e-10	a
G4P62_012479	694.632	56.6234	5.06264e-13	1.58602e-11	a
G4P62_012509	262.794	36.479	1.19865e-08	1.40453e-07	a
G4P62_012519	994.474	80.2434	3.76147e-18	3.37972e-16	a
G4P62_012520	449.724	41.2906	1.08111e-09	1.61326e-08	a
G4P62_012531	518.599	51.001	8.41943e-12	2.01561e-10	a
G4P62_012564	929.68	58.2251	2.27294e-13	7.60588e-12	a
G4P62_012588	118.981	48.893	2.41552e-11	5.26353e-10	a
G4P62_012591	1462.71	53.3546	2.59536e-12	7.01678e-11	a
G4P62_012623	298.82	33.1351	6.37988e-08	6.22798e-07	a
G4P62_012624	94.6123	64.9955	7.69832e-15	3.46406e-13	a
G4P62_012636	137.688	51.4846	6.61104e-12	1.62505e-10	a
G4P62_012655	386.732	36.6842	1.08177e-08	1.28467e-07	a
G4P62_012690	137.205	71.3852	3.15422e-16	1.86558e-14	a
G4P62_012691	696.613	33.059	6.62703e-08	6.43651e-07	a
G4P62_012717	245.011	52.6261	3.73592e-12	9.5733e-11	a
G4P62_012752	133.127	51.2268	7.52029e-12	1.82309e-10	a
G4P62_012753	687.504	43.4343	3.70133e-10	6.12009e-09	a
G4P62_012761	1128.18	43.7486	3.16312e-10	5.31338e-09	a
G4P62_012766	1688.19	48.1648	3.4765e-11	7.24399e-10	a
G4P62_012867	2047.55	65.8803	4.9462e-15	2.33644e-13	a
G4P62_012868	393.136	32.2657	9.85343e-08	9.13324e-07	a
G4P62_012878	196.429	32.2919	9.72549e-08	9.02654e-07	a
G4P62_012892	278.499	37.1468	8.58392e-09	1.04722e-07	a
G4P62_012907	97.4241	33.3252	5.80121e-08	5.74274e-07	a
G4P62_013010	67.6154	33.5302	5.23625e-08	5.23997e-07	a
G4P62_013048	347.918	72.2499	2.04707e-16	1.27129e-14	a
G4P62_013062	204.029	52.6615	3.6703e-12	9.42804e-11	a
G4P62_013127	201.454	100.156	1.78423e-22	3.65768e-20	a
G4P62_013128	1385.39	38.7535	3.84401e-09	5.04138e-08	a
G4P62_013129	28.1439	57.2315	3.73541e-13	1.20786e-11	a
G4P62_013130	8961.58	61.7899	3.82374e-14	1.49239e-12	a
G4P62_013140	240.935	84.8324	3.79205e-19	4.1921e-17	a
G4P62_013161	2851.72	85.6279	2.54764e-19	2.92355e-17	a
G4P62_013192	59.2049	32.8715	7.27867e-08	7.00178e-07	a
G4P62_013215	28.1064	48.8866	2.42335e-11	5.26973e-10	a
G4P62_013217	221.931	32.5841	8.40318e-08	7.92466e-07	a
G4P62_013220	563.7	59.6868	1.09441e-13	3.87726e-12	a
G4P62_013222	2413.99	51.0339	8.28172e-12	1.9894e-10	a
G4P62_013263	208.344	34.2879	3.58498e-08	3.71063e-07	a
G4P62_013305	104.759	34.4619	3.2862e-08	3.44529e-07	a
G4P62_013312	439.614	44.9865	1.70339e-10	3.06364e-09	a
G4P62_013325	133.286	43.4099	3.74672e-10	6.18062e-09	a
G4P62_013346	265.18	97.1316	8.0935e-22	1.49907e-19	a
G4P62_013347	1473.49	36.8451	9.98129e-09	1.19679e-07	a
G4P62_013378	902.686	65.0465	7.50461e-15	3.38589e-13	a
G4P62_013405	667.36	33.745	4.70299e-08	4.7491e-07	a
G4P62_013412	127.638	32.9517	6.99249e-08	6.7511e-07	a
G4P62_013421	80.1493	35.9411	1.56854e-08	1.79511e-07	a
G4P62_013433	560.215	40.2431	1.82524e-09	2.57792e-08	a
G4P62_013451	254.779	34.0523	4.03306e-08	4.13188e-07	a
G4P62_013455	98.0372	35.5569	1.90071e-08	2.12183e-07	a
G4P62_013462	383.881	42.0367	7.44485e-10	1.15332e-08	a
G4P62_013533	991.228	33.8126	4.54656e-08	4.61098e-07	a
G4P62_013582	117.529	46.751	7.04945e-11	1.36309e-09	a
G4P62_013598	967.183	60.3254	7.95267e-14	2.88029e-12	a
G4P62_013613	187.48	36.0043	1.51974e-08	1.74398e-07	a
G4P62_013614	446.722	60.88	6.02656e-14	2.25223e-12	a
G4P62_013618	583.497	33.5161	5.27319e-08	5.27194e-07	a
G4P62_013625	44.6054	85.7637	2.38038e-19	2.77689e-17	a
G4P62_013629	556.381	36.6084	1.12354e-08	1.32756e-07	a
G4P62_013652	463.189	35.0703	2.42432e-08	2.64272e-07	a
G4P62_013678	316.199	58.001	2.54244e-13	8.45412e-12	a
G4P62_013728	1319.3	33.4803	5.36835e-08	5.35441e-07	a
G4P62_013756	452.062	55.8422	7.48188e-13	2.26008e-11	a
G4P62_013759	80.3206	40.0806	1.97979e-09	2.76882e-08	a
G4P62_013777	189.353	34.6821	2.94364e-08	3.12651e-07	a
G4P62_013792	1256.22	40.7526	1.41477e-09	2.05453e-08	a
G4P62_013824	42.3963	34.8396	2.72071e-08	2.92504e-07	a
G4P62_013832	1049.08	98.2202	4.69621e-22	9.18153e-20	a
G4P62_013833	1597.36	53.5684	2.33218e-12	6.37874e-11	a
G4P62_013834	4678.7	75.3085	4.43576e-17	3.16423e-15	a
G4P62_013852	1299.07	43.7692	3.13075e-10	5.2716e-09	a
G4P62_013876	1894.06	35.436	2.01918e-08	2.23923e-07	a
G4P62_013923	217.56	48.8992	2.40807e-11	5.25273e-10	a
G4P62_013928	725.183	44.0295	2.74863e-10	4.68799e-09	a
G4P62_013929	481.985	41.0198	1.23784e-09	1.81886e-08	a
G4P62_013951	346.966	36.2945	1.31445e-08	1.52597e-07	a
G4P62_013995	533.607	37.0403	9.05332e-09	1.09799e-07	a
G4P62_014009	210.317	39.2783	2.95688e-09	3.98688e-08	a
G4P62_014010	912.595	33.2564	6.00444e-08	5.92171e-07	a
G4P62_014012	2005.12	37.1702	8.48402e-09	1.03669e-07	a
G4P62_014013	416.891	34.3647	3.44984e-08	3.58835e-07	a
G4P62_014021	642.637	35.3473	2.11075e-08	2.3371e-07	a
G4P62_014049	1196.12	35.2004	2.27161e-08	2.49169e-07	a
G4P62_014073	605.985	51.3854	6.94707e-12	1.69974e-10	a
G4P62_014105	765.059	66.8319	3.07349e-15	1.48846e-13	a
G4P62_014127	955.699	61.2023	5.12977e-14	1.94113e-12	a
G4P62_014157	58.622	34.8602	2.69274e-08	2.89792e-07	a
G4P62_014164	1367.35	43.7965	3.08831e-10	5.21677e-09	a
G4P62_014168	436.13	34.5449	3.15264e-08	3.32342e-07	a
G4P62_014204	294.752	33.5031	5.30751e-08	5.30028e-07	a
G4P62_014241	358.445	60.9244	5.89442e-14	2.20675e-12	a
G4P62_014245	520.513	61.0777	5.45932e-14	2.05479e-12	a
G4P62_014260	324.987	35.0245	2.48044e-08	2.69416e-07	a
G4P62_014261	269.168	50.4767	1.09427e-11	2.56728e-10	a
G4P62_014278	177.898	33.8374	4.49055e-08	4.56514e-07	a
G4P62_014304	399.76	46.111	9.70787e-11	1.8384e-09	a
G4P62_014308	456.637	57.7195	2.9267e-13	9.65581e-12	a
G4P62_014315	15413.8	56.6996	4.87345e-13	1.53129e-11	a
G4P62_014327	1744.1	71.7219	2.66549e-16	1.59892e-14	a
G4P62_014363	1475.2	44.1962	2.52883e-10	4.35178e-09	a
G4P62_014373	168.583	77.308	1.6322e-17	1.28119e-15	a
G4P62_014398	501.881	59.9466	9.61075e-14	3.44762e-12	a
G4P62_014412	374.119	42.3891	6.24197e-10	9.86522e-09	a
G4P62_014414	337.164	51.0819	8.08567e-12	1.94674e-10	a
G4P62_014458	692.694	108.253	3.11344e-24	9.39146e-22	a
G4P62_014544	1332.16	38.5844	4.18325e-09	5.46593e-08	a
G4P62_014550	2293.96	106.002	9.5909e-24	2.50015e-21	a
G4P62_014588	1135.88	46.3326	8.6899e-11	1.66504e-09	a
G4P62_014594	585.751	33.6332	4.9733e-08	4.99578e-07	a
G4P62_014645	143.824	72.6405	1.68392e-16	1.06775e-14	a
G4P62_014655	51.8724	32.1693	1.03401e-07	9.53823e-07	a
G4P62_014705	232.634	53.3082	2.65624e-12	7.14478e-11	a
G4P62_014766	362.734	38.2734	4.88689e-09	6.31867e-08	a
G4P62_014805	985.794	45.9294	1.06308e-10	1.99529e-09	a
G4P62_014831	258.537	92.5982	7.80843e-21	1.20347e-18	a
G4P62_014945	345.479	71.2052	3.45132e-16	2.01311e-14	a
G4P62_014957	196.734	56.8277	4.57108e-13	1.44273e-11	a
G4P62_014979	173.498	63.7442	1.43917e-14	6.06549e-13	a
G4P62_015001	1746.52	36.7579	1.04262e-08	1.24307e-07	a
G4P62_015026	272.838	47.6518	4.49297e-11	9.04376e-10	a
G4P62_015027	249.495	41.2242	1.11756e-09	1.65828e-08	a
G4P62_015040	252.201	76.4681	2.48406e-17	1.85339e-15	a
G4P62_015095	868.991	36.0161	1.51075e-08	1.73462e-07	a
G4P62_015115	446.458	52.9003	3.25717e-12	8.51178e-11	a
G4P62_015147	735.9	32.5568	8.51887e-08	8.00873e-07	a
G4P62_015163	2211.33	53.3111	2.65238e-12	7.14478e-11	a
G4P62_015176	1091.15	59.7809	1.0441e-13	3.71149e-12	a
G4P62_015182	219.409	45.0822	1.62381e-10	2.93551e-09	a
G4P62_015211	2102.94	69.379	8.60103e-16	4.69278e-14	a
G4P62_015235	305.157	43.5082	3.56717e-10	5.94013e-09	a
G4P62_015246	1062.35	38.0136	5.56482e-09	7.06562e-08	a
G4P62_015284	858.152	63.3036	1.79388e-14	7.36921e-13	a
G4P62_015292	206.446	32.8235	7.45539e-08	7.14249e-07	a
G4P62_015328	179.391	38.1072	5.31032e-09	6.78438e-08	a
G4P62_015336	957.597	49.4505	1.82792e-11	4.06708e-10	a
G4P62_015343	285.382	36.2055	1.37429e-08	1.59265e-07	a
G4P62_015402	3422.45	42.7858	5.11896e-10	8.22579e-09	a
G4P62_015406	272.835	70.8536	4.11465e-16	2.36733e-14	a
G4P62_015426	2276.72	32.8859	7.22642e-08	6.95786e-07	a
G4P62_015470	453.383	45.5531	1.28314e-10	2.37871e-09	a
G4P62_015481	939.753	47.7642	4.24761e-11	8.6405e-10	a
G4P62_015491	136.979	34.3645	3.45026e-08	3.58835e-07	a
G4P62_015494	306.475	34.1161	3.90651e-08	4.01392e-07	a
G4P62_015503	487.825	36.2943	1.31458e-08	1.52597e-07	a
G4P62_015504	1130.03	39.3829	2.80614e-09	3.79818e-08	a
G4P62_015516	445.714	43.1677	4.22914e-10	6.91164e-09	a
G4P62_015517	497.005	32.5908	8.37506e-08	7.90167e-07	a
G4P62_015522	112.819	34.9747	2.54302e-08	2.75505e-07	a
G4P62_015526	10858.1	83.9489	5.89823e-19	6.32796e-17	a
G4P62_015554	1095.85	41.9394	7.81577e-10	1.2046e-08	a
G4P62_015572	1678.19	63.2377	1.85403e-14	7.60152e-13	a
G4P62_015578	405.11	39.1917	3.08761e-09	4.14726e-08	a
G4P62_015601	227.707	35.501	1.95458e-08	2.17559e-07	a
G4P62_015624	36.3196	46.2984	8.83968e-11	1.69067e-09	a
G4P62_015637	338.152	49.5081	1.77605e-11	3.97681e-10	a
G4P62_015642	265.638	50.0145	1.37879e-11	3.15077e-10	a
G4P62_015643	200.648	33.8772	4.4021e-08	4.48386e-07	a
G4P62_015659	3653.9	90.8714	1.8515e-20	2.60629e-18	a
G4P62_015661	1807.34	81.9255	1.6222e-18	1.60811e-16	a
G4P62_015664	1665.3	85.3771	2.88802e-19	3.24364e-17	a
G4P62_015674	468.89	42.9271	4.76978e-10	7.70573e-09	a
G4P62_015676	28565.9	83.5416	7.23064e-19	7.52094e-17	a
G4P62_015681	912.322	35.7193	1.75247e-08	1.97879e-07	a
G4P62_015713	1721.63	41.1712	1.14762e-09	1.69811e-08	a
G4P62_015735	144.358	41.175	1.14544e-09	1.69607e-08	a
G4P62_015761	844.936	42.9633	4.68432e-10	7.58507e-09	a
G4P62_015773	922.667	47.7592	4.25821e-11	8.65371e-10	a
G4P62_015775	1053.99	48.8655	2.44905e-11	5.31467e-10	a
G4P62_015780	355.186	32.6379	8.18031e-08	7.73175e-07	a
G4P62_015797	317.475	43.7624	3.1413e-10	5.28514e-09	a
G4P62_015801	762.443	38.4693	4.43097e-09	5.76108e-08	a
G4P62_015809	258.659	54.6558	1.35407e-12	3.90057e-11	a
G4P62_015817	607.243	34.0357	4.06665e-08	4.16024e-07	a
G4P62_015841	662.504	33.2255	6.09786e-08	5.99983e-07	a
G4P62_015873	1193.38	41.0108	1.24343e-09	1.82581e-08	a
G4P62_015880	37.7235	41.3405	1.05446e-09	1.57795e-08	a
G4P62_015892	178.207	64.9923	7.71067e-15	3.46406e-13	a
G4P62_015893	1564.5	48.2946	3.25811e-11	6.8249e-10	a
G4P62_015894	2016.36	32.7401	7.77271e-08	7.41621e-07	a
G4P62_015907	143.701	71.0641	3.70363e-16	2.14841e-14	a
G4P62_015923	4943.82	36.5861	1.13615e-08	1.33946e-07	a
G4P62_015988	5093.21	45.36	1.41316e-10	2.59695e-09	a
G4P62_016049	3583.22	43.0679	4.4456e-10	7.22068e-09	a
G4P62_016088	156.07	34.4794	3.25764e-08	3.41874e-07	a
G4P62_016105	99.778	76.4007	2.56925e-17	1.9035e-15	a
G4P62_016136	609.643	43.1409	4.28614e-10	6.99397e-09	a
G4P62_016149	715.782	34.0954	3.94709e-08	4.05364e-07	a
G4P62_016154	2315.54	57.4191	3.40097e-13	1.11146e-11	a
G4P62_016182	1240.41	34.262	3.63165e-08	3.7455e-07	a
G4P62_016223	212.936	41.8422	8.20505e-10	1.25725e-08	a
G4P62_016227	1556.88	62.5617	2.59953e-14	1.03956e-12	a
G4P62_016248	2205.92	35.81	1.67477e-08	1.90225e-07	a
G4P62_016267	4535.14	45.0755	1.62926e-10	2.94134e-09	a
G4P62_016293	892.985	44.541	2.12834e-10	3.75438e-09	a
G4P62_016294	592.952	34.9853	2.52954e-08	2.74185e-07	a
G4P62_016336	403.766	37.4365	7.42627e-09	9.15386e-08	a
G4P62_016366	442.254	73.4373	1.13054e-16	7.41376e-15	a
G4P62_016409	1699.46	43.787	3.10297e-10	5.23414e-09	a
G4P62_016421	239.593	43.4546	3.66405e-10	6.07182e-09	a
G4P62_016427	888.441	59.1869	1.40518e-13	4.88001e-12	a
G4P62_016436	1484.4	52.6234	3.74086e-12	9.57433e-11	a
G4P62_016452	675.912	33.4357	5.48933e-08	5.46474e-07	a
G4P62_016482	188.431	67.0614	2.74026e-15	1.34247e-13	a
G4P62_016493	351.882	40.0188	2.04185e-09	2.84766e-08	a
G4P62_016517	1605.63	65.6451	5.56363e-15	2.59329e-13	a
G4P62_016552	958.345	69.7482	7.15098e-16	3.95269e-14	a
G4P62_016562	1450.35	36.1114	1.44045e-08	1.66203e-07	a
G4P62_016587	29.5076	39.7001	2.39464e-09	3.28117e-08	a
G4P62_016614	728.841	55.9285	7.16609e-13	2.17444e-11	a
G4P62_016652	187.913	38.0549	5.45096e-09	6.9461e-08	a
G4P62_016653	762.375	48.8727	2.44027e-11	5.30105e-10	a
G4P62_016654	622.226	97.1391	8.06312e-22	1.49907e-19	a
G4P62_016671	336.787	63.5493	1.58655e-14	6.59451e-13	a
G4P62_016697	1067.25	41.635	9.10079e-10	1.38147e-08	a
G4P62_016716	882.697	33.7608	4.6659e-08	4.71616e-07	a
G4P62_016721	150.688	50.8136	9.24611e-12	2.19855e-10	a
G4P62_016732	162.44	32.9089	7.14369e-08	6.88448e-07	a
G4P62_016735	484.702	36.8624	9.89557e-09	1.18854e-07	a
G4P62_016744	921.384	33.3447	5.74509e-08	5.69252e-07	a
G4P62_016762	1625.29	36.3213	1.29698e-08	1.50886e-07	a
G4P62_016778	286.423	46.4741	8.09606e-11	1.55691e-09	a
G4P62_016788	701.453	68.9193	1.08235e-15	5.84494e-14	a
G4P62_016819	458.374	54.4826	1.47658e-12	4.21894e-11	a
G4P62_016832	1028.76	43.8328	3.03269e-10	5.12693e-09	a
G4P62_016841	536.1	43.5267	3.53428e-10	5.89465e-09	a
G4P62_016895	123.393	38.5322	4.29377e-09	5.59302e-08	a
G4P62_016900	348.307	41.9858	7.63657e-10	1.17956e-08	a
G4P62_016903	1968.67	33.0746	6.57578e-08	6.39851e-07	a
G4P62_016920	61.6257	38.2421	4.96402e-09	6.38728e-08	a
G4P62_016921	822.624	67.9686	1.74105e-15	8.87977e-14	a
G4P62_016958	842.972	58.6549	1.83335e-13	6.23369e-12	a
G4P62_016992	4610.74	42.8431	4.97436e-10	8.01783e-09	a
G4P62_016996	94.9599	33.7008	4.80791e-08	4.84347e-07	a
G4P62_017002	258.598	61.5192	4.37792e-14	1.68994e-12	a
G4P62_017009	644.681	56.0789	6.64698e-13	2.03407e-11	a
G4P62_017018	2759.19	43.1296	4.31059e-10	7.023e-09	a
G4P62_017033	893.347	66.6055	3.44194e-15	1.6555e-13	a
G4P62_017046	9451.31	41.4889	9.79039e-10	1.47555e-08	a
G4P62_017088	1241.25	47.1899	5.66027e-11	1.11282e-09	a
G4P62_017102	1256.07	88.5984	5.7689e-20	7.38245e-18	a
G4P62_017155	723.295	42.6587	5.45495e-10	8.70607e-09	a
G4P62_017187	837.978	40.1308	1.93067e-09	2.70871e-08	a
G4P62_017206	134.208	35.5349	1.92174e-08	2.14243e-07	a
G4P62_017207	1211.15	39.0043	3.39092e-09	4.51161e-08	a
G4P62_017251	439.238	48.0958	3.59854e-11	7.46397e-10	a
G4P62_017262	847.299	50.1565	1.28425e-11	2.95391e-10	a
G4P62_017268	154.85	91.1485	1.612e-20	2.31546e-18	a
G4P62_017269	1883.65	44.0148	2.76896e-10	4.71124e-09	a
G4P62_017280	3814.66	36.6029	1.12662e-08	1.33046e-07	a
G4P62_017281	1445.82	53.5593	2.34283e-12	6.39959e-11	a
G4P62_017285	410.707	43.7384	3.17927e-10	5.33628e-09	a
G4P62_017287	651.581	53.1066	2.93803e-12	7.80332e-11	a
G4P62_017301	65234.9	60.6497	6.76222e-14	2.5006e-12	a
G4P62_017332	526.499	56.9641	4.26979e-13	1.36188e-11	a
G4P62_017341	5943.38	39.9607	2.10206e-09	2.92688e-08	a
G4P62_017357	286.682	43.1865	4.1895e-10	6.85215e-09	a
G4P62_017359	129.238	32.4167	9.13681e-08	8.51385e-07	a
G4P62_017364	1913.37	50.214	1.24788e-11	2.88282e-10	a
G4P62_017365	228.163	41.4967	9.75224e-10	1.47295e-08	a
G4P62_017390	50.4841	33.6631	4.8996e-08	4.92877e-07	a
G4P62_017392	167.962	32.7418	7.76607e-08	7.41322e-07	a
G4P62_017410	348.85	52.6879	3.62207e-12	9.31548e-11	a
G4P62_017460	430.027	41.7961	8.39625e-10	1.28283e-08	a
G4P62_017480	344.779	32.7669	7.66929e-08	7.33079e-07	a
G4P62_017482	385.576	39.2731	2.96453e-09	3.99465e-08	a
G4P62_017510	1898.97	41.4404	1.00308e-09	1.50963e-08	a
G4P62_017533	1480.01	49.7408	1.58096e-11	3.56265e-10	a
G4P62_017534	668.575	44.59	2.07686e-10	3.67585e-09	a
G4P62_017538	213.42	151.21	1.46238e-33	6.17564e-30	a
G4P62_017560	718.901	66.9225	2.93746e-15	1.42914e-13	a
G4P62_017570	12.881	37.746	6.36137e-09	7.95736e-08	a
G4P62_017574	189.824	36.5632	1.14921e-08	1.35184e-07	a
G4P62_017576	952.844	34.2395	3.67274e-08	3.78477e-07	a
G4P62_017588	449.748	39.8844	2.18385e-09	3.0297e-08	a
G4P62_017599	3433.17	61.7307	3.93865e-14	1.5344e-12	a
G4P62_017634	1735.72	32.9992	6.82848e-08	6.61259e-07	a
G4P62_017637	720.908	35.2529	2.21274e-08	2.43597e-07	a
G4P62_017657	298.652	42.9721	4.66363e-10	7.55738e-09	a
G4P62_017670	880.623	48.4426	3.0257e-11	6.38239e-10	a
G4P62_017694	500.63	60.5751	7.01907e-14	2.58652e-12	a
G4P62_017702	171.165	34.9309	2.59932e-08	2.81171e-07	a
G4P62_017703	134.285	60.8094	6.24306e-14	2.32901e-12	a
G4P62_017705	1018.6	72.4594	1.84349e-16	1.16195e-14	a
G4P62_017739	1389.68	37.6329	6.73173e-09	8.38587e-08	a
G4P62_017773	5069.38	53.4537	2.46988e-12	6.68609e-11	a
G4P62_017807	808.288	48.0014	3.7724e-11	7.77874e-10	a
G4P62_017845	60.6003	34.2664	3.62368e-08	3.74152e-07	a
G4P62_017870	55.3827	46.1126	9.70015e-11	1.8384e-09	a
G4P62_017873	2870.38	70.3234	5.36377e-16	3.01213e-14	a
G4P62_017876	67.5734	47.4586	4.94885e-11	9.86732e-10	a
G4P62_017884	1774.06	132.136	2.02795e-29	2.2537e-26	a
G4P62_017927	366.517	32.9431	7.02252e-08	6.77699e-07	a
G4P62_017951	1243.83	39.4306	2.74005e-09	3.71588e-08	a
G4P62_017972	107.348	56.0629	6.70017e-13	2.04738e-11	a
G4P62_017982	534.372	35.3077	2.15293e-08	2.38006e-07	a
G4P62_018005	26.2289	41.6805	8.89603e-10	1.35429e-08	a
G4P62_018022	38.4697	39.4895	2.66054e-09	3.61502e-08	a
G4P62_018028	2143.47	55.6461	8.25275e-13	2.47876e-11	a
G4P62_018038	664.132	34.4487	3.30798e-08	3.45953e-07	a
G4P62_018046	266.926	46.1812	9.37286e-11	1.78617e-09	a
G4P62_018047	658.638	76.6252	2.29636e-17	1.74416e-15	a
G4P62_018049	323.56	33.6808	4.8562e-08	4.88978e-07	a
G4P62_018073	202.393	93.3217	5.43812e-21	8.5691e-19	a
G4P62_018105	417.955	48.0129	3.75086e-11	7.74188e-10	a
G4P62_018111	413.908	33.7177	4.76752e-08	4.80966e-07	a
G4P62_018165	146.103	56.8577	4.50303e-13	1.42765e-11	a
G4P62_018182	127.618	39.7081	2.38503e-09	3.27012e-08	a
G4P62_018192	356.674	68.3879	1.41173e-15	7.37837e-14	a
G4P62_018212	978.588	34.7832	2.79853e-08	2.99347e-07	a
G4P62_018292	16076.8	52.5274	3.92478e-12	1.00329e-10	a
G4P62_018306	574.369	50.4004	1.1368e-11	2.66114e-10	a
G4P62_018330	97.3355	39.3586	2.84041e-09	3.83964e-08	a
G4P62_018331	893.075	69.6081	7.67008e-16	4.20659e-14	a
G4P62_018351	396.716	61.4961	4.42886e-14	1.70648e-12	a
G4P62_018360	1341.55	32.3746	9.33122e-08	8.67968e-07	a
G4P62_018387	773.05	64.6042	9.36237e-15	4.09289e-13	a
G4P62_018397	810.881	103.424	3.48206e-23	8.451e-21	a
G4P62_018399	23015.1	58.5499	1.93217e-13	6.50682e-12	a
G4P62_018400	981.817	33.982	4.17727e-08	4.2672e-07	a
G4P62_018408	189.671	41.8732	8.07898e-10	1.24154e-08	a
G4P62_018447	104.696	54.1048	1.78362e-12	4.98824e-11	a
G4P62_018451	87.6076	34.1976	3.75043e-08	3.85729e-07	a
G4P62_018506	1807.75	44.019	2.76307e-10	4.70881e-09	a
G4P62_018517	528.76	41.62	9.16936e-10	1.39088e-08	a
G4P62_018518	483.546	61.2513	5.00541e-14	1.90088e-12	a
G4P62_018531	398.853	50.2242	1.24149e-11	2.87435e-10	a
G4P62_018537	683.955	78.8429	7.57667e-18	6.42496e-16	a
G4P62_018559	2729.39	38.4997	4.36404e-09	5.67756e-08	a
G4P62_018573	464.894	49.358	1.91451e-11	4.2374e-10	a
G4P62_018585	217.324	41.806	8.35475e-10	1.27834e-08	a
G4P62_018606	157.888	44.519	2.15195e-10	3.78653e-09	a
G4P62_018611	7284.56	49.8269	1.51432e-11	3.4271e-10	a
G4P62_018647	339.69	47.7695	4.23627e-11	8.62574e-10	a
G4P62_018657	2878.1	108.044	3.45571e-24	1.01343e-21	a
G4P62_018660	4495.36	67.2075	2.54732e-15	1.25964e-13	a
G4P62_018668	484.133	36.0379	1.49438e-08	1.71769e-07	a
G4P62_018670	1109.7	47.6331	4.5352e-11	9.12008e-10	a
G4P62_018773	1351.09	80.0118	4.22339e-18	3.7157e-16	a
G4P62_018776	8696.35	32.7734	7.64443e-08	7.31365e-07	a
G4P62_018777	6469.25	75.7243	3.60312e-17	2.62345e-15	a
G4P62_018785	155.023	36.9146	9.64052e-09	1.16137e-07	a
G4P62_018790	160.344	53.5905	2.30664e-12	6.33351e-11	a
G4P62_018804	1464.34	40.2143	1.85173e-09	2.61185e-08	a
G4P62_018828	32.8681	37.9355	5.78643e-09	7.31946e-08	a
G4P62_018841	47.8838	54.927	1.18238e-12	3.4485e-11	a
G4P62_018880	252.891	42.8257	5.01782e-10	8.07555e-09	a
G4P62_018891	1182.8	53.0812	2.97551e-12	7.88305e-11	a
G4P62_018934	17771.4	45.4974	1.31938e-10	2.43308e-09	a
G4P62_018945	414.532	40.6007	1.5264e-09	2.2045e-08	a
G4P62_018951	473.858	51.1659	7.75296e-12	1.87519e-10	a
G4P62_018963	1292.48	47.3394	5.2526e-11	1.0414e-09	a
G4P62_018984	406.281	64.6392	9.19953e-15	4.03004e-13	a
G4P62_019025	155.011	32.5504	8.54619e-08	8.03083e-07	a
G4P62_019028	452.647	32.7145	7.87283e-08	7.48988e-07	a
G4P62_019065	23.423	67.4302	2.27888e-15	1.14296e-13	a
G4P62_019074	500.254	53.2355	2.75454e-12	7.36228e-11	a
G4P62_019089	1803	108.682	2.51161e-24	7.6859e-22	a
G4P62_019148	126.864	56.6929	4.8899e-13	1.53418e-11	a
G4P62_019155	2922.14	46.6057	7.58038e-11	1.46173e-09	a
G4P62_019194	8020.94	46.8537	6.69662e-11	1.29962e-09	a
G4P62_019199	648.966	32.165	1.03623e-07	9.55218e-07	a
G4P62_019256	743.847	80.192	3.85942e-18	3.45227e-16	a
G4P62_019260	152.961	65.7085	5.38983e-15	2.52342e-13	a
G4P62_019273	994.115	32.6741	8.03361e-08	7.63066e-07	a
G4P62_019283	43.5993	41.3286	1.06072e-09	1.5862e-08	a
G4P62_019286	96.275	36.2836	1.32164e-08	1.53332e-07	a
G4P62_019309	598.035	59.343	1.29968e-13	4.54351e-12	a
G4P62_019387	90.6613	46.9756	6.30041e-11	1.22951e-09	a
G4P62_019408	629.083	36.7489	1.04731e-08	1.24797e-07	a
G4P62_019415	414.699	54.8489	1.22945e-12	3.5659e-11	a
G4P62_019444	29.7375	42.0273	7.47981e-10	1.15789e-08	a
G4P62_019455	24.3822	33.7873	4.60444e-08	4.66073e-07	a
G4P62_019460	396.679	63.7596	1.42819e-14	6.04161e-13	a
G4P62_019471	172.689	97.8528	5.64346e-22	1.09323e-19	a
G4P62_019493	133.764	67.9256	1.77885e-15	9.05072e-14	a
G4P62_019494	320.611	71.987	2.3346e-16	1.42337e-14	a
G4P62_019507	257.673	44.4947	2.17816e-10	3.82655e-09	a
G4P62_019519	800.729	55.3407	9.61446e-13	2.85783e-11	a
G4P62_019525	1054.26	50.0199	1.37506e-11	3.14566e-10	a
G4P62_019566	61.4827	75.4706	4.09051e-17	2.94782e-15	a
G4P62_019575	593.522	74.5572	6.45807e-17	4.47089e-15	a
G4P62_019587	75.0682	36.6328	1.10991e-08	1.31367e-07	a
G4P62_019645	166.984	58.1801	2.32458e-13	7.76638e-12	a
G4P62_019689	349.239	32.653	8.11864e-08	7.69758e-07	a
G4P62_019750	1843.29	55.3991	9.3376e-13	2.7848e-11	a
G4P62_019757	401.424	32.65	8.13084e-08	7.70128e-07	a
G4P62_019814	72.1552	35.2854	2.17704e-08	2.40294e-07	a
G4P62_019896	111.731	33.7927	4.59215e-08	4.65275e-07	a
G4P62_019899	44.516	34.074	3.98953e-08	4.09125e-07	a
G4P62_019958	12.6637	71.3623	3.19058e-16	1.88182e-14	a
G4P62_020013	59.2876	41.8184	8.30318e-10	1.27137e-08	a
G4P62_020023	576.672	79.6854	4.97199e-18	4.32031e-16	a
G4P62_020103	1641.76	43.3004	3.95756e-10	6.50302e-09	a
G4P62_020117	182.093	51.9472	5.24576e-12	1.3139e-10	a
G4P62_020124	992.967	50.188	1.26416e-11	2.91407e-10	a
G4P62_020155	272.132	39.6315	2.4782e-09	3.38687e-08	a
G4P62_020159	13950.8	57.9566	2.59953e-13	8.6168e-12	a
G4P62_020177	164.098	32.7386	7.77858e-08	7.41846e-07	a
G4P62_020185	2743.74	32.8616	7.31458e-08	7.02992e-07	a
G4P62_020228	52.4245	71.7348	2.64837e-16	1.59317e-14	a
G4P62_000002	49.4897	48.7262	2.62572e-11	5.62294e-10	b
G4P62_000034	942.147	34.9984	2.51305e-08	2.72818e-07	b
G4P62_000061	2167.98	79.1315	6.55874e-18	5.62958e-16	b
G4P62_000106	2683.34	71.1283	3.58656e-16	2.08623e-14	b
G4P62_000122	703.437	37.1465	8.58504e-09	1.04722e-07	b
G4P62_000166	246.819	58.7085	1.78487e-13	6.11877e-12	b
G4P62_000178	6199.6	112.944	2.98241e-25	1.12772e-22	b
G4P62_000182	1106.97	50.3327	1.17599e-11	2.74351e-10	b
G4P62_000194	304.719	34.3855	3.41424e-08	3.55897e-07	b
G4P62_000220	7828.13	97.7462	5.95219e-22	1.14255e-19	b
G4P62_000261	1126.26	115.296	9.19977e-26	3.96435e-23	b
G4P62_000374	259.926	62.8708	2.2273e-14	9.02677e-13	b
G4P62_000419	6266.13	47.4943	4.86127e-11	9.72944e-10	b
G4P62_000420	1606.34	80.9903	2.58927e-18	2.39792e-16	b
G4P62_000460	5204.72	96.0825	1.36756e-21	2.46804e-19	b
G4P62_000462	747.393	32.714	7.87475e-08	7.48988e-07	b
G4P62_000472	2358.05	75.8682	3.35294e-17	2.44973e-15	b
G4P62_000474	890.904	74.6753	6.08788e-17	4.22847e-15	b
G4P62_000505	408.421	37.3	7.95056e-09	9.7489e-08	b
G4P62_000564	3561.54	47.3335	5.2681e-11	1.04349e-09	b
G4P62_000580	34.7667	39.8187	2.25672e-09	3.12054e-08	b
G4P62_000625	52.9826	42.3003	6.52532e-10	1.0244e-08	b
G4P62_000658	2447.46	50.5184	1.07171e-11	2.5369e-10	b
G4P62_000672	844.145	40.3598	1.72176e-09	2.44485e-08	b
G4P62_000673	1033.17	45.1206	1.59288e-10	2.88454e-09	b
G4P62_000717	859.557	59.8912	9.88061e-14	3.53609e-12	b
G4P62_000823	2876.88	54.4094	1.53161e-12	4.32931e-11	b
G4P62_000825	1914.66	71.3215	3.25631e-16	1.91524e-14	b
G4P62_000843	2261.61	62.3364	2.90952e-14	1.15696e-12	b
G4P62_000848	1647.81	81.07	2.48815e-18	2.32466e-16	b
G4P62_000849	3903.25	59.5953	1.14562e-13	4.03836e-12	b
G4P62_000855	2299.62	74.0893	8.16058e-17	5.50514e-15	b
G4P62_000861	904.871	47.0348	6.11692e-11	1.19813e-09	b
G4P62_000896	235.062	44.3258	2.37012e-10	4.11893e-09	b
G4P62_000958	1257.03	63.3286	1.77164e-14	7.29206e-13	b
G4P62_000966	4675.18	40.9993	1.25059e-09	1.83503e-08	b
G4P62_001036	1839.07	36.5756	1.14211e-08	1.34499e-07	b
G4P62_001040	803.452	43.3794	3.80435e-10	6.27079e-09	b
G4P62_001112	494.568	32.1862	1.02529e-07	9.46609e-07	b
G4P62_001125	2300.67	44.3937	2.29101e-10	4.01117e-09	b
G4P62_001132	606.239	83.0847	9.08642e-19	9.26858e-17	b
G4P62_001135	193.2	101.325	9.94375e-23	2.12083e-20	b
G4P62_001158	67.6944	33.1946	6.19287e-08	6.0848e-07	b
G4P62_001174	1933.67	35.4779	1.9773e-08	2.19741e-07	b
G4P62_001179	58.5423	63.3759	1.73018e-14	7.13531e-13	b
G4P62_001183	515.22	101.581	8.74949e-23	1.90459e-20	b
G4P62_001201	1953.46	75.0022	5.16981e-17	3.63868e-15	b
G4P62_001258	463.039	67.372	2.34611e-15	1.17389e-13	b
G4P62_001271	1205.23	39.4974	2.65001e-09	3.60302e-08	b
G4P62_001309	488.075	35.067	2.42829e-08	2.64564e-07	b
G4P62_001324	511.934	34.2786	3.60169e-08	3.72427e-07	b
G4P62_001353	1925.16	41.1249	1.17448e-09	1.73421e-08	b
G4P62_001374	392.565	38.3237	4.7656e-09	6.16578e-08	b
G4P62_001378	766.698	36.1321	1.42567e-08	1.64858e-07	b
G4P62_001385	590.44	45.1269	1.58785e-10	2.8779e-09	b
G4P62_001444	2356.23	56.0596	6.71131e-13	2.04782e-11	b
G4P62_001546	4771.81	35.1501	2.3294e-08	2.5511e-07	b
G4P62_001548	716.03	44.3894	2.29592e-10	4.01643e-09	b
G4P62_001565	3780.57	45.8999	1.07885e-10	2.02308e-09	b
G4P62_001567	2694.57	81.174	2.36201e-18	2.21662e-16	b
G4P62_001569	2285.77	59.6255	1.12846e-13	3.99118e-12	b
G4P62_001587	320.49	102.524	5.45984e-23	1.28094e-20	b
G4P62_001609	1867.04	118.524	1.8314e-26	1.01763e-23	b
G4P62_001671	1282.25	37.3469	7.76632e-09	9.52853e-08	b
G4P62_001697	835.936	34.6085	3.05399e-08	3.23072e-07	b
G4P62_001794	49.4897	48.7262	2.62572e-11	5.62294e-10	b
G4P62_001805	19.3188	36.0944	1.4528e-08	1.67536e-07	b
G4P62_001854	2614.32	95.3472	1.97521e-21	3.39078e-19	b
G4P62_001875	1358.23	34.8904	2.65239e-08	2.85596e-07	b
G4P62_001888	569.365	44.3819	2.30463e-10	4.02833e-09	b
G4P62_001890	713.322	33.0913	6.52103e-08	6.35109e-07	b
G4P62_002009	693.056	35.6649	1.80078e-08	2.02468e-07	b
G4P62_002102	86.5402	33.7906	4.59695e-08	4.65538e-07	b
G4P62_002107	3091.58	104.625	1.91e-23	4.80116e-21	b
G4P62_002111	103.339	35.127	2.35654e-08	2.57949e-07	b
G4P62_002143	984.709	36.6345	1.10899e-08	1.31331e-07	b
G4P62_002247	133.115	70.8103	4.20467e-16	2.40601e-14	b
G4P62_002290	815.411	37.4791	7.26954e-09	8.98691e-08	b
G4P62_002292	783.176	64.8395	8.32292e-15	3.68424e-13	b
G4P62_002299	2214.97	74.9836	5.21815e-17	3.66051e-15	b
G4P62_002312	5351.59	81.8597	1.67649e-18	1.64647e-16	b
G4P62_002327	1011.02	70.0066	6.28423e-16	3.5011e-14	b
G4P62_002331	1894.06	103.005	4.29222e-23	1.02989e-20	b
G4P62_002372	1248.96	48.1635	3.47876e-11	7.24399e-10	b
G4P62_002382	2448.56	46.9977	6.23143e-11	1.2183e-09	b
G4P62_002640	1113.35	52.9536	3.17154e-12	8.31889e-11	b
G4P62_002649	743.412	52.4263	4.12829e-12	1.05023e-10	b
G4P62_002680	3036.75	110.916	8.2216e-25	2.84589e-22	b
G4P62_002684	158.733	38.521	4.31784e-09	5.62091e-08	b
G4P62_002749	3316.59	51.3424	7.09791e-12	1.73346e-10	b
G4P62_002751	351.974	46.9925	6.2476e-11	1.22033e-09	b
G4P62_002753	720.467	78.2274	1.03072e-17	8.37062e-16	b
G4P62_002772	1032.14	42.0069	7.55641e-10	1.16889e-08	b
G4P62_002785	868.817	33.0884	6.53059e-08	6.35746e-07	b
G4P62_002803	3157.99	52.2844	4.43179e-12	1.12338e-10	b
G4P62_002808	381.234	40.4252	1.66638e-09	2.3726e-08	b
G4P62_002810	1873.52	34.6371	3.01059e-08	3.188e-07	b
G4P62_002844	1274.36	54.4503	1.50063e-12	4.26457e-11	b
G4P62_002845	336.09	79.9711	4.31019e-18	3.77633e-16	b
G4P62_002881	1547.58	38.0343	5.50748e-09	7.00545e-08	b
G4P62_002905	2917.43	67.2913	2.44277e-15	1.21649e-13	b
G4P62_002939	408.702	32.3807	9.30314e-08	8.66119e-07	b
G4P62_003049	2607.73	48.2396	3.34894e-11	7.00127e-10	b
G4P62_003051	845.019	37.7014	6.50481e-09	8.12716e-08	b
G4P62_003085	2238.86	41.8637	8.11748e-10	1.24601e-08	b
G4P62_003087	65.2588	39.5135	2.6288e-09	3.58111e-08	b
G4P62_003092	1035.23	52.9644	3.15447e-12	8.2844e-11	b
G4P62_003165	1338.35	68.2721	1.49589e-15	7.79894e-14	b
G4P62_003177	4874.11	117.429	3.16677e-26	1.51969e-23	b
G4P62_003190	2586.68	107.206	5.25447e-24	1.47931e-21	b
G4P62_003215	160.284	32.3808	9.3026e-08	8.66119e-07	b
G4P62_003216	72400.7	40.0867	1.97375e-09	2.76364e-08	b
G4P62_003223	2757.18	47.8051	4.16149e-11	8.50629e-10	b
G4P62_003226	2804.57	37.3634	7.70264e-09	9.46139e-08	b
G4P62_003247	15776	40.1442	1.91781e-09	2.69605e-08	b
G4P62_003263	706.7	86.5896	1.57513e-19	1.91143e-17	b
G4P62_003266	1805.02	53.8355	2.04068e-12	5.6473e-11	b
G4P62_003269	1397.52	40.4848	1.61747e-09	2.31404e-08	b
G4P62_003295	655.076	37.585	6.89492e-09	8.5639e-08	b
G4P62_003305	796.671	93.6586	4.59507e-21	7.29511e-19	b
G4P62_003312	1204.65	41.4482	9.99153e-10	1.50479e-08	b
G4P62_003328	1042.61	68.8981	1.0939e-15	5.89225e-14	b
G4P62_003372	713.107	95.9076	1.49252e-21	2.64828e-19	b
G4P62_003376	61.8711	50.926	8.74093e-12	2.08548e-10	b
G4P62_003378	2296.88	36.6872	1.08014e-08	1.28347e-07	b
G4P62_003383	49.4897	48.7262	2.62572e-11	5.62294e-10	b
G4P62_003425	915.904	34.7369	2.864e-08	3.05267e-07	b
G4P62_003452	1269.35	39.8115	2.26489e-09	3.12569e-08	b
G4P62_003472	2893.36	55.7689	7.7612e-13	2.33777e-11	b
G4P62_003610	4094.13	46.1503	9.51915e-11	1.81078e-09	b
G4P62_003637	285.587	66.4606	3.70049e-15	1.76778e-13	b
G4P62_003677	88.9091	52.0471	4.99026e-12	1.25739e-10	b
G4P62_003683	252.372	48.6863	2.67853e-11	5.73021e-10	b
G4P62_003703	349.242	38.0308	5.51727e-09	7.01368e-08	b
G4P62_003723	3371.23	81.2963	2.22192e-18	2.11218e-16	b
G4P62_003749	1997.32	54.5213	1.4483e-12	4.14622e-11	b
G4P62_003757	1723.47	91.4898	1.35906e-20	1.97907e-18	b
G4P62_003773	1097.06	40.6288	1.5051e-09	2.17672e-08	b
G4P62_003774	3186.42	33.1641	6.28807e-08	6.16125e-07	b
G4P62_003838	843.383	35.6562	1.80865e-08	2.03245e-07	b
G4P62_003842	127.16	44.7456	1.92144e-10	3.41508e-09	b
G4P62_003880	1167.8	48.61	2.78274e-11	5.91122e-10	b
G4P62_003920	2759.22	68.4303	1.38212e-15	7.25954e-14	b
G4P62_003947	1762.59	75.9084	3.2862e-17	2.40931e-15	b
G4P62_003964	306.755	33.1715	6.26466e-08	6.1439e-07	b
G4P62_003978	2055.13	58.8821	1.63646e-13	5.64604e-12	b
G4P62_003990	30.5627	68.7969	1.15066e-15	6.16655e-14	b
G4P62_004003	286.757	59.8716	9.97812e-14	3.56494e-12	b
G4P62_004033	5280.52	95.7802	1.59068e-21	2.79894e-19	b
G4P62_004034	1471.39	40.6153	1.51533e-09	2.19001e-08	b
G4P62_004061	765.709	32.6469	8.14344e-08	7.70725e-07	b
G4P62_004088	1131.35	45.5131	1.30905e-10	2.41614e-09	b
G4P62_004131	87.1945	61.1644	5.22775e-14	1.97467e-12	b
G4P62_004132	537.611	73.3708	1.16879e-16	7.59356e-15	b
G4P62_004147	722.921	56.2465	6.11266e-13	1.88697e-11	b
G4P62_004156	37.5949	32.0916	1.07497e-07	9.88591e-07	b
G4P62_004209	640.118	53.088	2.96544e-12	7.86625e-11	b
G4P62_004214	482.668	65.0541	7.47624e-15	3.38032e-13	b
G4P62_004239	412.104	51.0179	8.34851e-12	2.00089e-10	b
G4P62_004240	1546.02	39.2165	3.04969e-09	4.10415e-08	b
G4P62_004249	766.183	34.5701	3.11315e-08	3.29e-07	b
G4P62_004277	1931.26	51.0304	8.29632e-12	1.99065e-10	b
G4P62_004317	800.08	47.7729	4.22899e-11	8.61923e-10	b
G4P62_004328	586.36	39.595	2.5238e-09	3.44474e-08	b
G4P62_004349	3995.76	113.78	1.96364e-25	7.82308e-23	b
G4P62_004375	267.149	50.3137	1.18721e-11	2.75473e-10	b
G4P62_004383	22.01	35.2622	2.20253e-08	2.426e-07	b
G4P62_004416	440.421	54.2632	1.64775e-12	4.62048e-11	b
G4P62_004421	311.881	33.9611	4.22116e-08	4.30995e-07	b
G4P62_004422	597.18	56.3013	5.94741e-13	1.84405e-11	b
G4P62_004463	208.824	73.3971	1.1535e-16	7.51736e-15	b
G4P62_004471	2028.75	52.3095	4.37668e-12	1.11208e-10	b
G4P62_004513	1540.27	39.0398	3.33131e-09	4.43789e-08	b
G4P62_004521	906.01	33.1393	6.36642e-08	6.22094e-07	b
G4P62_004525	1608.3	68.4503	1.3684e-15	7.20541e-14	b
G4P62_004555	1155.52	33.6501	4.93154e-08	4.95619e-07	b
G4P62_004585	439.16	70.9997	3.82488e-16	2.21219e-14	b
G4P62_004638	3177.38	102.076	6.83229e-23	1.53371e-20	b
G4P62_004713	1628.61	99.0255	3.13968e-22	6.19574e-20	b
G4P62_004722	1655.53	39.5256	2.61286e-09	3.56169e-08	b
G4P62_004745	3923.25	38.5551	4.24492e-09	5.53622e-08	b
G4P62_004772	5432.89	59.7363	1.06765e-13	3.7888e-12	b
G4P62_004795	2064.64	44.7525	1.91477e-10	3.40609e-09	b
G4P62_004834	54.8616	35.0705	2.42401e-08	2.64272e-07	b
G4P62_004854	1289.67	53.9682	1.90965e-12	5.30555e-11	b
G4P62_004872	796.712	38.2041	5.05927e-09	6.49401e-08	b
G4P62_004922	1222.76	37.1064	8.75872e-09	1.06594e-07	b
G4P62_004952	3296.51	75.5983	3.83737e-17	2.77487e-15	b
G4P62_004953	626.337	54.4365	1.511e-12	4.28804e-11	b
G4P62_004982	36.5508	43.6508	3.32163e-10	5.55755e-09	b
G4P62_005000	140.324	35.6076	1.85316e-08	2.07364e-07	b
G4P62_005105	2787.55	42.337	6.40666e-10	1.00953e-08	b
G4P62_005129	516.541	47.1913	5.65638e-11	1.11282e-09	b
G4P62_005140	1437.5	140.465	3.15018e-31	4.75114e-28	b
G4P62_005169	1631.74	52.8161	3.39729e-12	8.84509e-11	b
G4P62_005218	377.9	69.3677	8.64976e-16	4.70721e-14	b
G4P62_005222	4346.88	38.8299	3.69993e-09	4.8645e-08	b
G4P62_005225	379.02	54.6075	1.38717e-12	3.97963e-11	b
G4P62_005273	3165.04	33.3698	5.67328e-08	5.624e-07	b
G4P62_005297	743.149	47.6535	4.4893e-11	9.04376e-10	b
G4P62_005302	669.563	62.9371	2.15463e-14	8.76588e-13	b
G4P62_005327	301.625	52.8062	3.41409e-12	8.86697e-11	b
G4P62_005335	268.939	42.6863	5.38011e-10	8.61266e-09	b
G4P62_005340	593.672	42.2531	6.68122e-10	1.04577e-08	b
G4P62_005341	1178.06	49.9522	1.42236e-11	3.24332e-10	b
G4P62_005389	199.418	66.2829	4.04446e-15	1.91908e-13	b
G4P62_005411	1002.63	67.6045	2.08867e-15	1.05508e-13	b
G4P62_005428	1549.14	38.8411	3.6793e-09	4.8404e-08	b
G4P62_005429	1890.34	54.3898	1.5467e-12	4.36029e-11	b
G4P62_005441	142.315	35.0324	2.47067e-08	2.68493e-07	b
G4P62_005447	20.3185	35.6685	1.79752e-08	2.02317e-07	b
G4P62_005460	131.366	32.2714	9.8254e-08	9.11126e-07	b
G4P62_005537	977.242	37.4415	7.40783e-09	9.13647e-08	b
G4P62_005619	4104.42	54.6345	1.36856e-12	3.93694e-11	b
G4P62_005627	785.689	33.1487	6.33667e-08	6.203e-07	b
G4P62_005657	4077.56	52.4624	4.05445e-12	1.03393e-10	b
G4P62_005705	1246.92	63.5217	1.60858e-14	6.67291e-13	b
G4P62_005745	943.503	38.5718	4.20966e-09	5.49363e-08	b
G4P62_005776	1450.93	42.2301	6.7584e-10	1.05576e-08	b
G4P62_005777	756.788	34.4565	3.29512e-08	3.45292e-07	b
G4P62_005782	5495.56	33.8477	4.46749e-08	4.54388e-07	b
G4P62_005795	288.025	67.185	2.57611e-15	1.2709e-13	b
G4P62_005825	4779.78	61.958	3.51546e-14	1.38222e-12	b
G4P62_005839	319.541	56.5965	5.13121e-13	1.60512e-11	b
G4P62_005861	1294.35	90.0793	2.7512e-20	3.74784e-18	b
G4P62_005863	1714.7	48.2692	3.29969e-11	6.90514e-10	b
G4P62_005870	1100.79	150.579	2.00537e-33	7.05722e-30	b
G4P62_005877	2655.11	38.9705	3.4488e-09	4.56847e-08	b
G4P62_005884	533.416	37.9775	5.66611e-09	7.18127e-08	b
G4P62_005885	1794.24	123.143	1.81871e-27	1.28007e-24	b
G4P62_005903	1377.53	76.4948	2.45112e-17	1.8353e-15	b
G4P62_005909	778.242	51.5651	6.35022e-12	1.56641e-10	b
G4P62_005911	102.992	72.0163	2.30064e-16	1.41215e-14	b
G4P62_005912	448.26	53.0668	2.99703e-12	7.92018e-11	b
G4P62_005915	1134.11	49.4688	1.81127e-11	4.03855e-10	b
G4P62_005937	2027.38	38.2341	4.984e-09	6.40518e-08	b
G4P62_005940	2221.89	36.6608	1.09448e-08	1.29832e-07	b
G4P62_005947	1978.05	58.7713	1.72974e-13	5.94845e-12	b
G4P62_005962	23.2489	37.0195	9.1476e-09	1.10752e-07	b
G4P62_005964	1096.85	83.2531	8.35239e-19	8.60296e-17	b
G4P62_005978	1874.7	37.3535	7.74085e-09	9.50279e-08	b
G4P62_005982	122.702	45.162	1.56027e-10	2.83364e-09	b
G4P62_005985	1962.42	112.938	2.99086e-25	1.12772e-22	b
G4P62_005986	505.117	33.1414	6.35975e-08	6.22094e-07	b
G4P62_005987	3624.51	48.44	3.02964e-11	6.38432e-10	b
G4P62_006020	131.862	34.3303	3.50962e-08	3.63977e-07	b
G4P62_006023	622.039	35.3618	2.09551e-08	2.32144e-07	b
G4P62_006046	977.484	86.3309	1.79262e-19	2.13849e-17	b
G4P62_006061	1113.15	36.6377	1.10718e-08	1.3119e-07	b
G4P62_006085	2021.34	42.227	6.76912e-10	1.05576e-08	b
G4P62_006088	1223.79	47.7926	4.18768e-11	8.54327e-10	b
G4P62_006124	411.75	32.4542	8.9674e-08	8.3893e-07	b
G4P62_006145	247.293	57.5882	3.12515e-13	1.02945e-11	b
G4P62_006146	1412.35	64.5155	9.78651e-15	4.2519e-13	b
G4P62_006227	168.246	74.2872	7.39169e-17	5.08389e-15	b
G4P62_006276	292.249	52.7092	3.58377e-12	9.22821e-11	b
G4P62_006299	542.976	42.6495	5.48007e-10	8.73955e-09	b
G4P62_006315	3443.64	33.9086	4.33346e-08	4.41969e-07	b
G4P62_006324	125.023	33.394	5.605e-08	5.56415e-07	b
G4P62_006336	1102.59	36.158	1.40728e-08	1.62821e-07	b
G4P62_006372	1812.28	113.863	1.88381e-25	7.64934e-23	b
G4P62_006390	1567.9	73.2953	1.21375e-16	7.8374e-15	b
G4P62_006456	993.832	66.4089	3.79735e-15	1.80996e-13	b
G4P62_006473	92.3309	32.1378	1.05045e-07	9.66882e-07	b
G4P62_006557	1074.01	36.4002	1.24678e-08	1.45527e-07	b
G4P62_006559	1645.63	35.065	2.43075e-08	2.64564e-07	b
G4P62_006565	3512.9	44.7183	1.94785e-10	3.45911e-09	b
G4P62_006571	2538.37	33.0527	6.64823e-08	6.45414e-07	b
G4P62_006595	4298.68	61.0092	5.64976e-14	2.12268e-12	b
G4P62_006605	30.0657	37.5081	7.16523e-09	8.86314e-08	b
G4P62_006612	114.697	39.7708	2.31149e-09	3.17754e-08	b
G4P62_006649	3073.4	33.4861	5.35296e-08	5.34157e-07	b
G4P62_006720	912.556	44.3419	2.3511e-10	4.08925e-09	b
G4P62_006723	3372.41	59.8464	1.01048e-13	3.60411e-12	b
G4P62_006734	472.567	64.9561	7.85154e-15	3.5124e-13	b
G4P62_006742	875.075	93.7798	4.32483e-21	7.02452e-19	b
G4P62_006749	1676.62	48.2248	3.37384e-11	7.04636e-10	b
G4P62_006751	1518.99	63.6964	1.47399e-14	6.18752e-13	b
G4P62_006764	8484.29	47.7536	4.27008e-11	8.66949e-10	b
G4P62_006770	687.453	59.8288	1.0194e-13	3.6298e-12	b
G4P62_006800	292.51	48.7659	2.57405e-11	5.54038e-10	b
G4P62_006821	652.565	45.5539	1.2826e-10	2.37871e-09	b
G4P62_006833	2260.51	52.5036	3.97179e-12	1.01408e-10	b
G4P62_006897	1013.53	34.3851	3.41486e-08	3.55897e-07	b
G4P62_006898	2482.73	72.4892	1.81623e-16	1.14819e-14	b
G4P62_006913	104.502	33.8492	4.46409e-08	4.54261e-07	b
G4P62_006918	2942.58	45.9458	1.05436e-10	1.98068e-09	b
G4P62_006921	7747.95	106.418	7.79131e-24	2.10117e-21	b
G4P62_006934	1602.87	36.1286	1.42813e-08	1.65051e-07	b
G4P62_006937	1664.72	97.4944	6.7509e-22	1.28419e-19	b
G4P62_006963	2852.61	78.8079	7.71042e-18	6.51222e-16	b
G4P62_007014	664.345	51.8624	5.47295e-12	1.36436e-10	b
G4P62_007045	129.152	34.4496	3.30644e-08	3.45953e-07	b
G4P62_007115	1686.06	89.4721	3.72716e-20	4.88814e-18	b
G4P62_007148	202.807	33.294	5.89242e-08	5.82211e-07	b
G4P62_007182	870.08	47.6954	4.39626e-11	8.90855e-10	b
G4P62_007220	2391.03	63.7561	1.43065e-14	6.04161e-13	b
G4P62_007224	1135.44	57.1107	3.96802e-13	1.27332e-11	b
G4P62_007250	2091.14	53.5715	2.32858e-12	6.37717e-11	b
G4P62_007267	1078.86	37.9799	5.65952e-09	7.17722e-08	b
G4P62_007274	1446.57	34.9025	2.63642e-08	2.84021e-07	b
G4P62_007278	946.555	78.728	8.02457e-18	6.75055e-16	b
G4P62_007283	2682.82	77.5144	1.47216e-17	1.17679e-15	b
G4P62_007324	3291.84	35.8185	1.66765e-08	1.89593e-07	b
G4P62_007331	1550.44	51.2427	7.46086e-12	1.81076e-10	b
G4P62_007365	669.304	67.461	2.24403e-15	1.12816e-13	b
G4P62_007370	161.438	84.1282	5.39265e-19	5.83928e-17	b
G4P62_007384	3398.13	81.9841	1.57533e-18	1.56901e-16	b
G4P62_007412	4180.5	51.2068	7.59586e-12	1.8393e-10	b
G4P62_007462	434.555	32.9607	6.96112e-08	6.72696e-07	b
G4P62_007549	3208.12	53.5291	2.37847e-12	6.48855e-11	b
G4P62_007612	85.8454	57.5229	3.22888e-13	1.06196e-11	b
G4P62_007613	75.1126	59.352	1.29382e-13	4.53804e-12	b
G4P62_007681	955.948	35.2478	2.2184e-08	2.44093e-07	b
G4P62_007690	635.149	34.0234	4.0918e-08	4.18191e-07	b
G4P62_007720	3482.19	73.1539	1.30264e-16	8.36027e-15	b
G4P62_007737	1031.36	59.6054	1.13987e-13	4.02482e-12	b
G4P62_007772	1113.65	90.6606	2.05732e-20	2.8208e-18	b
G4P62_007777	4030.01	55.0459	1.11415e-12	3.27651e-11	b
G4P62_007782	1596.08	36.5296	1.1687e-08	1.37228e-07	b
G4P62_007815	2301.68	51.5966	6.25075e-12	1.54549e-10	b
G4P62_007821	152.661	44.4526	2.22449e-10	3.90442e-09	b
G4P62_007874	221.589	53.0158	3.07439e-12	8.10433e-11	b
G4P62_007883	970.281	45.7579	1.15822e-10	2.16423e-09	b
G4P62_007893	2682.44	123.221	1.7492e-27	1.2736e-24	b
G4P62_007897	2529.08	67.3146	2.41444e-15	1.20522e-13	b
G4P62_007911	183.12	39.3837	2.80499e-09	3.79818e-08	b
G4P62_007983	232.226	32.2437	9.96234e-08	9.218e-07	b
G4P62_007988	749.846	34.0488	4.0402e-08	4.13719e-07	b
G4P62_007994	1879.99	43.9076	2.9214e-10	4.95067e-09	b
G4P62_008010	3016.58	45.5383	1.29268e-10	2.3922e-09	b
G4P62_008053	456.19	51.0467	8.22914e-12	1.97902e-10	b
G4P62_008061	1356.5	61.5626	4.2841e-14	1.65676e-12	b
G4P62_008104	1702.89	40.319	1.7573e-09	2.4903e-08	b
G4P62_008131	1832.4	65.5193	5.92467e-15	2.75549e-13	b
G4P62_008134	1155.12	93.064	6.18591e-21	9.60408e-19	b
G4P62_008140	301.916	51.8372	5.54242e-12	1.38005e-10	b
G4P62_008155	4834.77	61.5775	4.25229e-14	1.64747e-12	b
G4P62_008156	6632.1	39.3232	2.89124e-09	3.90336e-08	b
G4P62_008177	1203.69	50.1267	1.30354e-11	2.99177e-10	b
G4P62_008190	2048.42	82.8863	1.00337e-18	1.01857e-16	b
G4P62_008231	550.832	38.5723	4.20855e-09	5.49363e-08	b
G4P62_008263	29.7082	36.9824	9.31908e-09	1.12699e-07	b
G4P62_008292	1125.9	38.6241	4.10086e-09	5.36158e-08	b
G4P62_008306	915.228	34.4923	3.23659e-08	3.40003e-07	b
G4P62_008385	240.222	44.2162	2.50363e-10	4.31896e-09	b
G4P62_008401	1364.25	71.9948	2.3256e-16	1.42334e-14	b
G4P62_008426	317.898	52.0909	4.88211e-12	1.23308e-10	b
G4P62_008430	1574.35	48.6833	2.68257e-11	5.73305e-10	b
G4P62_008434	2195.46	107.534	4.45894e-24	1.2723e-21	b
G4P62_008449	747.796	61.2727	4.95235e-14	1.88412e-12	b
G4P62_008450	6552.57	53.7159	2.16646e-12	5.9719e-11	b
G4P62_008455	248.312	37.8178	6.13711e-09	7.70422e-08	b
G4P62_008480	3275.41	48.9189	2.38445e-11	5.20769e-10	b
G4P62_008515	1076.79	41.3012	1.07536e-09	1.60581e-08	b
G4P62_008572	1329.71	81.6816	1.83263e-18	1.79148e-16	b
G4P62_008574	1197.93	54.7875	1.2678e-12	3.66204e-11	b
G4P62_008575	610.253	68.1927	1.5565e-15	8.07505e-14	b
G4P62_008583	245.274	40.0989	1.96169e-09	2.74859e-08	b
G4P62_008628	1794.41	41.0634	1.21116e-09	1.78463e-08	b
G4P62_008635	713.676	114.501	1.3692e-25	5.66877e-23	b
G4P62_008648	2171.14	73.2786	1.2239e-16	7.87886e-15	b
G4P62_008674	103.751	71.2787	3.32677e-16	1.95124e-14	b
G4P62_008690	3826.77	46.917	6.48777e-11	1.26374e-09	b
G4P62_008711	1774.1	33.4577	5.42952e-08	5.4103e-07	b
G4P62_008718	314.52	44.2785	2.42684e-10	4.21404e-09	b
G4P62_008722	585.801	37.4248	7.46974e-09	9.20208e-08	b
G4P62_008723	1340.03	34.8093	2.76221e-08	2.96061e-07	b
G4P62_008735	1340	35.4894	1.96597e-08	2.18597e-07	b
G4P62_008778	974.272	68.6992	1.20822e-15	6.42611e-14	b
G4P62_008808	927.861	35.9252	1.58105e-08	1.80551e-07	b
G4P62_008991	3417.73	83.7569	6.49256e-19	6.82042e-17	b
G4P62_009039	76.3601	33.7618	4.66359e-08	4.71608e-07	b
G4P62_009044	102.719	41.5745	9.3801e-10	1.42014e-08	b
G4P62_009045	268.96	33.2415	6.04911e-08	5.95741e-07	b
G4P62_009092	132.702	35.4392	2.01594e-08	2.23681e-07	b
G4P62_009126	1887.65	80.5957	3.15409e-18	2.87063e-16	b
G4P62_009130	538.955	52.7182	3.56772e-12	9.20935e-11	b
G4P62_009169	1069.01	73.7983	9.43831e-17	6.26698e-15	b
G4P62_009180	2930.25	54.9794	1.15178e-12	3.37307e-11	b
G4P62_009214	1000.04	38.4261	4.52773e-09	5.87977e-08	b
G4P62_009238	220.639	74.1865	7.77332e-17	5.27761e-15	b
G4P62_009246	1107.6	74.179	7.8027e-17	5.28058e-15	b
G4P62_009258	667.13	34.2047	3.73715e-08	3.84738e-07	b
G4P62_009318	189.928	49.9426	1.42926e-11	3.25554e-10	b
G4P62_009319	178.163	51.5518	6.39239e-12	1.57497e-10	b
G4P62_009356	155.245	53.735	2.14587e-12	5.92288e-11	b
G4P62_009408	963.006	45.693	1.19641e-10	2.22968e-09	b
G4P62_009412	542.183	32.768	7.66494e-08	7.32995e-07	b
G4P62_009441	540.41	62.038	3.37767e-14	1.33059e-12	b
G4P62_009454	2041.99	46.486	8.048e-11	1.54908e-09	b
G4P62_009497	1025.98	56.9194	4.36616e-13	1.38634e-11	b
G4P62_009499	356.413	72.061	2.24983e-16	1.38499e-14	b
G4P62_009519	80.8785	34.2353	3.68045e-08	3.79087e-07	b
G4P62_009520	24.9153	37.5089	7.16223e-09	8.86314e-08	b
G4P62_009577	604.562	51.9717	5.18197e-12	1.30104e-10	b
G4P62_009579	51.6169	62.785	2.32498e-14	9.38659e-13	b
G4P62_009599	8494.01	66.5302	3.57402e-15	1.71512e-13	b
G4P62_009667	2815.64	91.9615	1.07354e-20	1.60765e-18	b
G4P62_009686	896.915	56.1071	6.55376e-13	2.00846e-11	b
G4P62_009696	1967.05	50.3219	1.18234e-11	2.74947e-10	b
G4P62_009746	10171.5	41.0438	1.22306e-09	1.79964e-08	b
G4P62_009833	682.367	58.703	1.78978e-13	6.12499e-12	b
G4P62_009838	302.057	39.8551	2.21604e-09	3.07233e-08	b
G4P62_009843	690.771	57.3138	3.58486e-13	1.16632e-11	b
G4P62_009890	29214.9	49.9239	1.44268e-11	3.28256e-10	b
G4P62_009906	819.73	53.2811	2.69251e-12	7.23312e-11	b
G4P62_009925	677.826	54.3808	1.5537e-12	4.37418e-11	b
G4P62_009928	59.8972	35.7008	1.76879e-08	1.99615e-07	b
G4P62_009951	639.126	60.1886	8.51557e-14	3.07361e-12	b
G4P62_010024	9518.59	141.748	1.65873e-31	2.69415e-28	b
G4P62_010031	1538.08	112.863	3.10493e-25	1.13856e-22	b
G4P62_010042	923.398	36.7417	1.05111e-08	1.25108e-07	b
G4P62_010052	21.6519	32.2174	1.00945e-07	9.32905e-07	b
G4P62_010069	444.659	38.8513	3.6606e-09	4.82181e-08	b
G4P62_010077	96.5472	34.7753	2.80954e-08	3.00372e-07	b
G4P62_010171	3702.89	68.7745	1.16361e-15	6.22016e-14	b
G4P62_010194	1028.29	41.4009	1.0231e-09	1.53866e-08	b
G4P62_010203	1538.89	78.3557	9.66677e-18	7.94217e-16	b
G4P62_010208	324.194	34.7377	2.86284e-08	3.05267e-07	b
G4P62_010261	1043.5	33.064	6.61073e-08	6.42659e-07	b
G4P62_010299	839.35	45.5152	1.30769e-10	2.41573e-09	b
G4P62_010349	2247.85	110.701	9.15457e-25	3.11772e-22	b
G4P62_010357	2614.95	65.1689	7.05933e-15	3.20554e-13	b
G4P62_010390	1145.61	42.4109	6.1742e-10	9.7654e-09	b
G4P62_010437	297.551	37.1961	8.37487e-09	1.02454e-07	b
G4P62_010542	719.812	41.288	1.0825e-09	1.61389e-08	b
G4P62_010546	84.6749	32.2579	9.89207e-08	9.16101e-07	b
G4P62_010547	237.252	57.1307	3.92849e-13	1.26256e-11	b
G4P62_010570	622.268	51.717	5.88581e-12	1.45867e-10	b
G4P62_010571	53.6854	68.5606	1.29498e-15	6.83587e-14	b
G4P62_010581	166.786	44.8302	1.84177e-10	3.29289e-09	b
G4P62_010589	1543.85	47.3075	5.33706e-11	1.05616e-09	b
G4P62_010595	3643.54	40.3215	1.75512e-09	2.48887e-08	b
G4P62_010602	13226	35.7329	1.74064e-08	1.96754e-07	b
G4P62_010616	77.906	36.4846	1.19525e-08	1.40132e-07	b
G4P62_010669	2305.74	32.8204	7.46688e-08	7.15026e-07	b
G4P62_010701	649.258	44.5335	2.13637e-10	3.7654e-09	b
G4P62_010705	179.74	71.4127	3.11128e-16	1.84695e-14	b
G4P62_010726	596.88	33.3072	5.85364e-08	5.78921e-07	b
G4P62_010754	3206.65	39.0989	3.23435e-09	4.3251e-08	b
G4P62_010758	759.17	88.2346	6.91985e-20	8.74926e-18	b
G4P62_010759	86.4648	43.132	4.30542e-10	7.01999e-09	b
G4P62_010770	168.227	75.2921	4.4722e-17	3.17948e-15	b
G4P62_010790	84.4016	32.7174	7.86167e-08	7.48418e-07	b
G4P62_010882	2339.27	112.849	3.12747e-25	1.13856e-22	b
G4P62_010909	4072.99	49.5059	1.778e-11	3.97695e-10	b
G4P62_010974	504.93	40.5614	1.55667e-09	2.24056e-08	b
G4P62_010981	1529.27	71.94	2.39017e-16	1.45024e-14	b
G4P62_011028	3047.16	128.703	1.12849e-28	1.036e-25	b
G4P62_011033	94.7666	42.8069	5.06512e-10	8.14547e-09	b
G4P62_011053	1546.47	43.7758	3.12037e-10	5.25831e-09	b
G4P62_011054	513.589	45.5655	1.27519e-10	2.36812e-09	b
G4P62_011078	546.757	47.9189	3.93128e-11	8.07481e-10	b
G4P62_011090	1329.05	62.6407	2.49884e-14	1.0012e-12	b
G4P62_011106	1005.55	81.4396	2.06829e-18	1.98509e-16	b
G4P62_011132	280.563	83.1918	8.61246e-19	8.82777e-17	b
G4P62_011144	4888.43	37.3744	7.66051e-09	9.4206e-08	b
G4P62_011150	66.4926	41.7737	8.49102e-10	1.29543e-08	b
G4P62_011183	652.147	41.3935	1.02689e-09	1.54216e-08	b
G4P62_011226	369.164	43.6217	3.37027e-10	5.63446e-09	b
G4P62_011253	713.676	114.501	1.3692e-25	5.66877e-23	b
G4P62_011291	2196.25	117.542	2.99315e-26	1.50477e-23	b
G4P62_011321	1425.51	33.1024	6.48509e-08	6.32191e-07	b
G4P62_011323	352.767	53.2771	2.69787e-12	7.23832e-11	b
G4P62_011330	12474.7	67.2774	2.45984e-15	1.22211e-13	b
G4P62_011359	2997.03	85.5515	2.64685e-19	3.02099e-17	b
G4P62_011404	255.208	32.6494	8.13349e-08	7.70128e-07	b
G4P62_011410	3375.35	119.807	9.64266e-27	5.65569e-24	b
G4P62_011414	12027.5	64.9185	8.00057e-15	3.5715e-13	b
G4P62_011415	2008.42	66.9464	2.90246e-15	1.41537e-13	b
G4P62_011429	2644.18	34.2014	3.74339e-08	3.85194e-07	b
G4P62_011521	122.766	36.9697	9.37823e-09	1.1322e-07	b
G4P62_011550	434.755	37.6637	6.62872e-09	8.2673e-08	b
G4P62_011557	94.1144	41.5367	9.55927e-10	1.44484e-08	b
G4P62_011562	254.391	50.1676	1.27714e-11	2.94076e-10	b
G4P62_011573	285.689	36.7423	1.0508e-08	1.25108e-07	b
G4P62_011607	1288.69	64.3837	1.04536e-14	4.52311e-13	b
G4P62_011621	564.036	50.9118	8.80308e-12	2.09557e-10	b
G4P62_011736	1111.97	40.4847	1.61758e-09	2.31404e-08	b
G4P62_011789	209.382	55.9145	7.2163e-13	2.18611e-11	b
G4P62_011815	1285.35	33.3761	5.65538e-08	5.6089e-07	b
G4P62_011876	673.698	63.5581	1.57956e-14	6.57839e-13	b
G4P62_011892	4267.04	45.321	1.44105e-10	2.64589e-09	b
G4P62_011897	1178.66	53.9825	1.89605e-12	5.27473e-11	b
G4P62_011937	716.082	35.4651	1.99003e-08	2.21039e-07	b
G4P62_011943	459.048	59.9453	9.61709e-14	3.44762e-12	b
G4P62_011976	1229.5	45.1159	1.59665e-10	2.88889e-09	b
G4P62_012076	1382.4	65.4122	6.25051e-15	2.86308e-13	b
G4P62_012090	3027.93	86.7233	1.47324e-19	1.80857e-17	b
G4P62_012149	86.7314	32.7373	7.78388e-08	7.41863e-07	b
G4P62_012168	1066.67	58.4523	2.02878e-13	6.82128e-12	b
G4P62_012184	1762.93	54.0773	1.8083e-12	5.0439e-11	b
G4P62_012204	347.885	44.3783	2.30878e-10	4.02892e-09	b
G4P62_012206	783.194	47.8467	4.07593e-11	8.34756e-10	b
G4P62_012208	388.718	33.4725	5.38943e-08	5.37289e-07	b
G4P62_012226	2046.49	121.892	3.40038e-27	2.24372e-24	b
G4P62_012244	906.538	62.6415	2.49787e-14	1.0012e-12	b
G4P62_012259	219.118	58.9626	1.57197e-13	5.44134e-12	b
G4P62_012282	49.2238	58.8022	1.70321e-13	5.86676e-12	b
G4P62_012289	677.838	40.4006	1.68703e-09	2.39876e-08	b
G4P62_012316	508.038	43.1084	4.35641e-10	7.09219e-09	b
G4P62_012363	530.988	42.2267	6.77003e-10	1.05576e-08	b
G4P62_012422	744.7	36.0832	1.46094e-08	1.68291e-07	b
G4P62_012425	45.1623	43.86	2.99178e-10	5.06181e-09	b
G4P62_012429	397.922	58.6599	1.82881e-13	6.22826e-12	b
G4P62_012430	1077.5	70.7061	4.42956e-16	2.51425e-14	b
G4P62_012438	42.5332	48.7934	2.53889e-11	5.47585e-10	b
G4P62_012439	307.276	81.2795	2.24073e-18	2.11218e-16	b
G4P62_012452	4173.11	109.959	1.32681e-24	4.37743e-22	b
G4P62_012508	252.746	40.5955	1.5304e-09	2.20878e-08	b
G4P62_012514	872.504	73.431	1.1341e-16	7.41376e-15	b
G4P62_012525	351.11	48.0698	3.64567e-11	7.54689e-10	b
G4P62_012573	590.445	53.4711	2.44845e-12	6.64511e-11	b
G4P62_012580	529.388	64.0389	1.24203e-14	5.33037e-13	b
G4P62_012594	689.343	33.0661	6.60361e-08	6.42263e-07	b
G4P62_012596	502.217	71.7137	2.67653e-16	1.60099e-14	b
G4P62_012667	65.6039	65.3437	6.46849e-15	2.95633e-13	b
G4P62_012680	88.6104	45.8331	1.1155e-10	2.08809e-09	b
G4P62_012734	218.369	39.5107	2.63248e-09	3.58381e-08	b
G4P62_012738	686.851	43.4296	3.71012e-10	6.12779e-09	b
G4P62_012780	2441.98	41.9655	7.71442e-10	1.19072e-08	b
G4P62_012793	1248.12	70.5253	4.84864e-16	2.73741e-14	b
G4P62_012827	452.026	33.6526	4.9253e-08	4.95227e-07	b
G4P62_012859	1630.03	48.0506	3.68081e-11	7.61217e-10	b
G4P62_012869	1707.28	50.9664	8.56614e-12	2.0484e-10	b
G4P62_012887	575.602	35.3106	2.14984e-08	2.37789e-07	b
G4P62_012913	265.207	42.6793	5.39896e-10	8.63628e-09	b
G4P62_012945	3566.08	106.313	8.21048e-24	2.16705e-21	b
G4P62_012950	2922.73	63.0069	2.08075e-14	8.49808e-13	b
G4P62_012957	695.131	48.7592	2.58275e-11	5.55344e-10	b
G4P62_012967	3910.57	144.271	4.69934e-32	1.10252e-28	b
G4P62_012971	1490.02	42.8263	5.01623e-10	8.07555e-09	b
G4P62_012986	3213.61	81.3618	2.15037e-18	2.05453e-16	b
G4P62_013025	2013.27	47.6691	4.45435e-11	9.00035e-10	b
G4P62_013033	653.109	52.8429	3.352e-12	8.73797e-11	b
G4P62_013053	2128	39.7468	2.33932e-09	3.20954e-08	b
G4P62_013087	886.864	34.4524	3.30181e-08	3.45817e-07	b
G4P62_013126	1230.99	48.0178	3.74163e-11	7.73037e-10	b
G4P62_013135	1231.14	35.2077	2.26333e-08	2.4839e-07	b
G4P62_013152	1206.16	95.743	1.62059e-21	2.828e-19	b
G4P62_013178	1637.71	48.8137	2.51322e-11	5.43158e-10	b
G4P62_013195	606.391	38.3985	4.59061e-09	5.95764e-08	b
G4P62_013204	1645.41	32.6536	8.11628e-08	7.69758e-07	b
G4P62_013219	213.523	37.4447	7.39601e-09	9.12722e-08	b
G4P62_013247	51.4445	42.1231	7.13001e-10	1.10862e-08	b
G4P62_013254	2599.92	49.9893	1.39625e-11	3.18722e-10	b
G4P62_013330	196.997	73.6788	1.00198e-16	6.63223e-15	b
G4P62_013359	3612.47	37.9392	5.77566e-09	7.31133e-08	b
G4P62_013367	2278.14	42.047	7.40648e-10	1.14878e-08	b
G4P62_013401	258.519	33.5073	5.29637e-08	5.29261e-07	b
G4P62_013402	4666.39	43.2257	4.1082e-10	6.72961e-09	b
G4P62_013428	395.785	73.0234	1.3905e-16	8.87021e-15	b
G4P62_013432	1122.58	108.925	2.22506e-24	6.90913e-22	b
G4P62_013442	2357.23	47.1758	5.70042e-11	1.11967e-09	b
G4P62_013450	1592.03	41.9528	7.76349e-10	1.19741e-08	b
G4P62_013464	597.653	46.2692	8.96964e-11	1.71397e-09	b
G4P62_013479	2465.56	35.0434	2.4571e-08	2.67156e-07	b
G4P62_013506	2039.26	35.8181	1.66799e-08	1.89593e-07	b
G4P62_013536	892.216	44.4946	2.17832e-10	3.82655e-09	b
G4P62_013562	2012.16	73.9368	8.80721e-17	5.91283e-15	b
G4P62_013577	1071.91	61.9283	3.56805e-14	1.39776e-12	b
G4P62_013592	1601.55	92.5057	8.17802e-21	1.24229e-18	b
G4P62_013596	587.324	41.2608	1.09732e-09	1.63283e-08	b
G4P62_013601	2704.25	53.056	3.01321e-12	7.95298e-11	b
G4P62_013682	772.94	50.3491	1.16636e-11	2.7243e-10	b
G4P62_013709	2095.29	32.509	8.725e-08	8.18066e-07	b
G4P62_013804	296.069	51.2487	7.43856e-12	1.80742e-10	b
G4P62_013813	518.985	60.9718	5.75628e-14	2.15886e-12	b
G4P62_013844	1490.47	55.8086	7.60882e-13	2.29515e-11	b
G4P62_013903	429.863	40.0612	1.99903e-09	2.79348e-08	b
G4P62_013926	1216.83	35.0967	2.39247e-08	2.61411e-07	b
G4P62_013930	783.373	46.9095	6.51218e-11	1.26732e-09	b
G4P62_013934	436	32.6303	8.21126e-08	7.75753e-07	b
G4P62_013961	39.2729	32.9977	6.83337e-08	6.61259e-07	b
G4P62_013980	853.192	49.7666	1.56071e-11	3.52076e-10	b
G4P62_014054	1025.1	44.9641	1.72255e-10	3.09282e-09	b
G4P62_014070	337.385	47.4874	4.8779e-11	9.75349e-10	b
G4P62_014071	199.99	48.4488	3.01625e-11	6.36882e-10	b
G4P62_014077	705.261	70.1313	5.90442e-16	3.29819e-14	b
G4P62_014078	1869.01	43.6546	3.31533e-10	5.55141e-09	b
G4P62_014116	621.494	65.8092	5.1252e-15	2.4156e-13	b
G4P62_014120	208.307	60.5039	7.27353e-14	2.66633e-12	b
G4P62_014144	524.036	54.6135	1.383e-12	3.97307e-11	b
G4P62_014183	1515.44	86.2356	1.88008e-19	2.23021e-17	b
G4P62_014184	161.992	53.4888	2.42697e-12	6.59535e-11	b
G4P62_014188	52.2814	39.4821	2.6704e-09	3.62607e-08	b
G4P62_014302	341.374	40.2175	1.84879e-09	2.60943e-08	b
G4P62_014310	396.209	42.4298	6.11613e-10	9.68082e-09	b
G4P62_014339	783.349	49.1678	2.10546e-11	4.64059e-10	b
G4P62_014367	85.2716	36.943	9.50462e-09	1.1468e-07	b
G4P62_014383	876.373	65.2592	6.7474e-15	3.0705e-13	b
G4P62_014386	4094.26	74.777	5.7861e-17	4.03213e-15	b
G4P62_014409	975.025	37.8647	5.99489e-09	7.54363e-08	b
G4P62_014411	935.27	58.7083	1.78506e-13	6.11877e-12	b
G4P62_014483	209.525	36.4538	1.21381e-08	1.42071e-07	b
G4P62_014498	1087.17	50.7394	9.59562e-12	2.27909e-10	b
G4P62_014517	3465.57	46.1153	9.68692e-11	1.83773e-09	b
G4P62_014551	3007.03	117.811	2.61643e-26	1.34746e-23	b
G4P62_014555	10533.7	37.551	7.01316e-09	8.69031e-08	b
G4P62_014566	1282.28	56.1353	6.46221e-13	1.98328e-11	b
G4P62_014598	616.725	77.6986	1.34264e-17	1.07794e-15	b
G4P62_014607	179.245	40.4658	1.63293e-09	2.33441e-08	b
G4P62_014675	369.565	40.0803	1.98007e-09	2.76882e-08	b
G4P62_014723	1644	62.0798	3.30776e-14	1.30548e-12	b
G4P62_014757	490.868	58.1514	2.35825e-13	7.86643e-12	b
G4P62_014794	588.36	37.8894	5.92135e-09	7.46443e-08	b
G4P62_014818	441.664	37.1128	8.73101e-09	1.06318e-07	b
G4P62_014820	765.886	36.6164	1.11903e-08	1.32298e-07	b
G4P62_014827	878.855	53.1572	2.86463e-12	7.62758e-11	b
G4P62_014838	401.016	84.687	4.07805e-19	4.48479e-17	b
G4P62_014850	1602.46	39.2083	3.0622e-09	4.11791e-08	b
G4P62_014869	624.644	38.3936	4.60183e-09	5.96853e-08	b
G4P62_014898	4485.98	75.4398	4.15389e-17	2.98332e-15	b
G4P62_014899	796.096	34.6095	3.05241e-08	3.23066e-07	b
G4P62_014907	880.94	99.9675	1.96038e-22	3.98014e-20	b
G4P62_014918	1704.66	104.729	1.81332e-23	4.61305e-21	b
G4P62_014922	856.566	43.578	3.44475e-10	5.74987e-09	b
G4P62_014935	2600.77	56.8388	4.54574e-13	1.43881e-11	b
G4P62_014997	1358.52	36.124	1.43146e-08	1.65346e-07	b
G4P62_014998	1441.21	104.85	1.70619e-23	4.39345e-21	b
G4P62_014999	726.944	39.4549	2.70698e-09	3.67338e-08	b
G4P62_015035	289.065	62.697	2.4295e-14	9.77123e-13	b
G4P62_015036	1179.59	41.0389	1.22609e-09	1.80285e-08	b
G4P62_015061	5765.44	91.7121	1.21609e-20	1.78318e-18	b
G4P62_015067	1745.87	32.1638	1.03687e-07	9.55218e-07	b
G4P62_015100	495.545	39.4997	2.64698e-09	3.60122e-08	b
G4P62_015102	360.731	38.6919	3.96434e-09	5.18952e-08	b
G4P62_015118	303.413	48.6172	2.77274e-11	5.89592e-10	b
G4P62_015121	906.44	93.6654	4.5794e-21	7.29511e-19	b
G4P62_015126	554.597	39.7814	2.29917e-09	3.16473e-08	b
G4P62_015133	1052.49	45.2801	1.47081e-10	2.68948e-09	b
G4P62_015161	491.867	49.7898	1.54269e-11	3.48383e-10	b
G4P62_015164	999.458	50.4949	1.08434e-11	2.5582e-10	b
G4P62_015165	77.1788	48.9185	2.38496e-11	5.20769e-10	b
G4P62_015167	6785.54	32.516	8.6945e-08	8.15568e-07	b
G4P62_015177	2418.78	55.4259	9.21335e-13	2.75398e-11	b
G4P62_015194	2945.74	54.9069	1.1943e-12	3.4735e-11	b
G4P62_015197	1288.43	40.6499	1.48931e-09	2.15537e-08	b
G4P62_015247	44.5007	43.4827	3.61291e-10	5.99726e-09	b
G4P62_015248	621.61	40.9005	1.31393e-09	1.9213e-08	b
G4P62_015254	775.255	36.6387	1.10666e-08	1.3119e-07	b
G4P62_015261	293.563	57.4485	3.35127e-13	1.09879e-11	b
G4P62_015318	1270.05	61.279	4.93659e-14	1.88152e-12	b
G4P62_015361	1258.85	52.6531	3.68571e-12	9.45611e-11	b
G4P62_015374	620.545	95.2395	2.08451e-21	3.54955e-19	b
G4P62_015448	2253.97	106.829	6.34415e-24	1.76259e-21	b
G4P62_015464	760.238	81.52	1.98683e-18	1.9244e-16	b
G4P62_015528	765.514	48.6364	2.7462e-11	5.84537e-10	b
G4P62_015589	681.281	101.511	9.06083e-23	1.95224e-20	b
G4P62_015607	1173.29	77.2432	1.68594e-17	1.31361e-15	b
G4P62_015615	1731.95	35.7437	1.73121e-08	1.95898e-07	b
G4P62_015644	863.208	62.9699	2.11966e-14	8.64027e-13	b
G4P62_015665	6664.37	76.5986	2.3272e-17	1.75496e-15	b
G4P62_015669	7071.9	103.845	2.8205e-23	6.92499e-21	b
G4P62_015682	195.766	54.4571	1.49551e-12	4.25574e-11	b
G4P62_015692	431.51	53.2553	2.72746e-12	7.29916e-11	b
G4P62_015707	3104.92	57.1515	3.88781e-13	1.2533e-11	b
G4P62_015710	2116.21	78.358	9.65534e-18	7.94217e-16	b
G4P62_015731	1008.04	38.7635	3.82488e-09	5.01941e-08	b
G4P62_015737	2406.78	64.6513	9.14431e-15	4.01418e-13	b
G4P62_015750	3422.94	115.935	6.68282e-26	3.00219e-23	b
G4P62_015766	3524.2	56.2031	6.24672e-13	1.92273e-11	b
G4P62_015786	3656.67	83.8119	6.3166e-19	6.70227e-17	b
G4P62_015789	241.248	37.5171	7.13277e-09	8.83334e-08	b
G4P62_015790	984.425	34.9102	2.62633e-08	2.83512e-07	b
G4P62_015819	1487.88	32.6519	8.12311e-08	7.69836e-07	b
G4P62_015929	3065.16	40.8283	1.36223e-09	1.98232e-08	b
G4P62_015965	924.579	43.4519	3.6689e-10	6.07182e-09	b
G4P62_015987	110.966	68.8098	1.14325e-15	6.1424e-14	b
G4P62_016024	1517.72	80.0923	4.05665e-18	3.58394e-16	b
G4P62_016052	2466.33	43.4811	3.61568e-10	5.99726e-09	b
G4P62_016085	516.437	53.4887	2.42699e-12	6.59535e-11	b
G4P62_016086	18546.4	54.4671	1.48808e-12	4.24034e-11	b
G4P62_016093	3185.62	57.9941	2.55119e-13	8.46988e-12	b
G4P62_016115	206.754	67.1553	2.61469e-15	1.28393e-13	b
G4P62_016158	2224.6	73.4371	1.13065e-16	7.41376e-15	b
G4P62_016159	1553	90.7187	1.99837e-20	2.77602e-18	b
G4P62_016200	416.188	89.7366	3.26541e-20	4.33642e-18	b
G4P62_016204	175.407	49.4397	1.8378e-11	4.08474e-10	b
G4P62_016233	1983.78	52.9423	3.1896e-12	8.34553e-11	b
G4P62_016262	127.252	116.871	4.18527e-26	1.92113e-23	b
G4P62_016305	916.733	76.4025	2.56691e-17	1.9035e-15	b
G4P62_016319	2851.68	47.5826	4.65119e-11	9.33553e-10	b
G4P62_016321	1287.23	45.7535	1.16082e-10	2.16716e-09	b
G4P62_016325	249.787	70.3105	5.39857e-16	3.02363e-14	b
G4P62_016334	68.5939	34.9431	2.58348e-08	2.79602e-07	b
G4P62_016356	261.943	63.8493	1.36553e-14	5.82823e-13	b
G4P62_016364	1305.56	42.3268	6.43948e-10	1.01319e-08	b
G4P62_016368	354.51	56.2536	6.09094e-13	1.88302e-11	b
G4P62_016376	1764.5	128.559	1.21257e-28	1.06681e-25	b
G4P62_016377	1843.81	79.1225	6.58812e-18	5.63191e-16	b
G4P62_016445	990.496	35.8911	1.60819e-08	1.83452e-07	b
G4P62_016456	1074.53	64.6688	9.06479e-15	3.98756e-13	b
G4P62_016461	1077.01	69.7619	7.10218e-16	3.93603e-14	b
G4P62_016462	479.076	34.6683	2.96403e-08	3.14659e-07	b
G4P62_016497	844.332	48.522	2.90796e-11	6.171e-10	b
G4P62_016555	1152.33	40.0212	2.03944e-09	2.84619e-08	b
G4P62_016558	1911.72	34.909	2.62792e-08	2.83539e-07	b
G4P62_016581	3795.22	38.3685	4.66003e-09	6.0329e-08	b
G4P62_016582	479.609	107.791	3.92096e-24	1.13412e-21	b
G4P62_016590	3465.24	83.6301	6.91751e-19	7.23085e-17	b
G4P62_016619	1585.65	80.8554	2.77001e-18	2.54343e-16	b
G4P62_016726	166.076	35.7241	1.7483e-08	1.97514e-07	b
G4P62_016733	1120.81	42.2451	6.70808e-10	1.04919e-08	b
G4P62_016734	591.451	43.9446	2.86787e-10	4.86386e-09	b
G4P62_016739	3834.92	42.6056	5.60156e-10	8.9131e-09	b
G4P62_016794	3866.07	76.6089	2.31517e-17	1.75214e-15	b
G4P62_016825	1868.24	108.112	3.33975e-24	9.93222e-22	b
G4P62_016827	1111.6	35.6973	1.77186e-08	1.99854e-07	b
G4P62_016834	89.6384	44.8071	1.86326e-10	3.32125e-09	b
G4P62_016846	119.175	81.9047	1.63915e-18	1.61732e-16	b
G4P62_016929	1364.83	51.1536	7.80061e-12	1.88455e-10	b
G4P62_016965	1807.78	40.7123	1.44353e-09	2.09198e-08	b
G4P62_016986	74.7981	35.9671	1.54827e-08	1.77479e-07	b
G4P62_016998	2179	36.9809	9.32628e-09	1.12721e-07	b
G4P62_017023	752.249	68.1514	1.58899e-15	8.22343e-14	b
G4P62_017035	557.567	59.3797	1.27602e-13	4.48304e-12	b
G4P62_017036	2493.66	55.2483	1.00691e-12	2.97773e-11	b
G4P62_017065	209.874	58.5806	1.9028e-13	6.43873e-12	b
G4P62_017079	490.813	113.06	2.81415e-25	1.10038e-22	b
G4P62_017081	437.042	36.1986	1.37906e-08	1.5973e-07	b
G4P62_017184	704.107	44.4301	2.24973e-10	3.94217e-09	b
G4P62_017192	618.965	32.6703	8.04874e-08	7.63817e-07	b
G4P62_017193	1311.92	53.073	2.98775e-12	7.90557e-11	b
G4P62_017240	884.813	62.3841	2.84097e-14	1.13183e-12	b
G4P62_017246	1690.1	125.036	7.05813e-28	5.32258e-25	b
G4P62_017260	2831.52	36.1734	1.39653e-08	1.61665e-07	b
G4P62_017297	1563.04	48.5134	2.92051e-11	6.19143e-10	b
G4P62_017311	883.533	38.0292	5.5215e-09	7.01483e-08	b
G4P62_017406	4473.59	34.8518	2.70417e-08	2.90874e-07	b
G4P62_017417	2424.76	47.1277	5.83928e-11	1.14481e-09	b
G4P62_017418	65.465	35.685	1.78283e-08	2.00877e-07	b
G4P62_017430	2721.69	44.8176	1.85343e-10	3.31092e-09	b
G4P62_017437	304.102	33.528	5.24197e-08	5.24321e-07	b
G4P62_017438	7075.37	64.3914	1.04134e-14	4.51498e-13	b
G4P62_017440	917.026	59.9604	9.54496e-14	3.43342e-12	b
G4P62_017459	1018.2	85.9645	2.15298e-19	2.52557e-17	b
G4P62_017485	1557.47	32.4472	8.99872e-08	8.41115e-07	b
G4P62_017508	1948.46	54.9181	1.18767e-12	3.45898e-11	b
G4P62_017519	175.302	41.8881	8.01872e-10	1.23318e-08	b
G4P62_017532	242.45	42.2287	6.76331e-10	1.05576e-08	b
G4P62_017541	39.5182	58.3079	2.18069e-13	7.32038e-12	b
G4P62_017547	650.126	78.424	9.3419e-18	7.73546e-16	b
G4P62_017578	902.374	34.9223	2.61045e-08	2.82086e-07	b
G4P62_017604	1995.44	91.4078	1.41595e-20	2.0478e-18	b
G4P62_017615	274.234	39.8984	2.16854e-09	3.01043e-08	b
G4P62_017645	115.66	35.7757	1.70375e-08	1.93205e-07	b
G4P62_017677	228.504	34.2686	3.61962e-08	3.74098e-07	b
G4P62_017707	644.3	35.242	2.22484e-08	2.4442e-07	b
G4P62_017723	2764.52	53.8293	2.04696e-12	5.65728e-11	b
G4P62_017763	225.6	33.9319	4.28339e-08	4.37138e-07	b
G4P62_017772	1279.02	42.3351	6.41285e-10	1.00975e-08	b
G4P62_017788	1667.96	42.5866	5.6551e-10	8.97801e-09	b
G4P62_017793	694.726	52.7587	3.49622e-12	9.06914e-11	b
G4P62_017805	2330.29	50.0331	1.36602e-11	3.12837e-10	b
G4P62_017831	392.168	34.3522	3.47146e-08	3.6055e-07	b
G4P62_017851	1323.1	66.3883	3.83678e-15	1.82463e-13	b
G4P62_017859	349.856	44.6013	2.06518e-10	3.65824e-09	b
G4P62_017861	137.969	41.1942	1.13446e-09	1.68099e-08	b
G4P62_017887	300.709	49.2253	2.04582e-11	4.51384e-10	b
G4P62_017895	238.696	39.8157	2.26016e-09	3.12326e-08	b
G4P62_017915	182.678	77.2854	1.65077e-17	1.29096e-15	b
G4P62_017979	1006.38	90.9592	1.77194e-20	2.52801e-18	b
G4P62_018016	387.251	38.2583	4.92401e-09	6.34757e-08	b
G4P62_018027	409.266	38.0477	5.47062e-09	6.96696e-08	b
G4P62_018033	42.5332	48.7934	2.53889e-11	5.47585e-10	b
G4P62_018034	307.276	81.2795	2.24073e-18	2.11218e-16	b
G4P62_018044	3095.92	76.7813	2.12403e-17	1.63087e-15	b
G4P62_018077	1837.73	79.5091	5.43027e-18	4.69919e-16	b
G4P62_018081	1417.17	77.8762	1.22854e-17	9.93898e-16	b
G4P62_018094	657.75	36.7616	1.0407e-08	1.24149e-07	b
G4P62_018126	34.1724	36.8882	9.76835e-09	1.17526e-07	b
G4P62_018158	294.375	91.8768	1.11998e-20	1.65374e-18	b
G4P62_018159	1299.2	53.1329	2.8996e-12	7.71095e-11	b
G4P62_018200	3314.6	109.832	1.41328e-24	4.591e-22	b
G4P62_018204	886.824	60.7583	6.40465e-14	2.3767e-12	b
G4P62_018235	928.644	33.3807	5.64241e-08	5.59866e-07	b
G4P62_018254	240.36	67.0318	2.78112e-15	1.35934e-13	b
G4P62_018275	267.458	35.6869	1.78108e-08	2.00787e-07	b
G4P62_018302	2840.07	49.5429	1.74541e-11	3.9165e-10	b
G4P62_018332	330.678	37.0353	9.07606e-09	1.10012e-07	b
G4P62_018356	995.13	53.4652	2.45574e-12	6.65635e-11	b
G4P62_018401	871.243	38.9845	3.42474e-09	4.53944e-08	b
G4P62_018410	1379.92	45.2102	1.52309e-10	2.77263e-09	b
G4P62_018413	315.651	42.7269	5.272e-10	8.45241e-09	b
G4P62_018416	1975.66	90.6856	2.0318e-20	2.80401e-18	b
G4P62_018436	3204.32	58.3007	2.18864e-13	7.33542e-12	b
G4P62_018445	1093.63	47.3478	5.23064e-11	1.03802e-09	b
G4P62_018456	867.23	35.7475	1.7279e-08	1.95733e-07	b
G4P62_018457	3109.22	53.2112	2.7883e-12	7.43371e-11	b
G4P62_018472	892.058	36.3843	1.25675e-08	1.46609e-07	b
G4P62_018478	1483.69	67.7384	1.95346e-15	9.89142e-14	b
G4P62_018488	2832.3	48.3079	3.23642e-11	6.79295e-10	b
G4P62_018491	747.485	40.9348	1.29161e-09	1.89128e-08	b
G4P62_018493	4206.33	44.2656	2.44255e-10	4.23089e-09	b
G4P62_018497	667.026	41.0957	1.19177e-09	1.75727e-08	b
G4P62_018528	991.179	40.4518	1.64435e-09	2.34757e-08	b
G4P62_018594	808.702	49.3324	1.93909e-11	4.28733e-10	b
G4P62_018632	1488.21	93.1056	6.05878e-21	9.47638e-19	b
G4P62_018674	2425.34	32.4297	9.07768e-08	8.46622e-07	b
G4P62_018693	1079.28	111.468	6.23761e-25	2.23232e-22	b
G4P62_018695	2831.17	78.2935	9.97187e-18	8.16109e-16	b
G4P62_018708	4964.98	62.1651	3.16969e-14	1.25572e-12	b
G4P62_018745	3123.97	34.4307	3.33785e-08	3.48732e-07	b
G4P62_018748	426.353	33.2178	6.12138e-08	6.02017e-07	b
G4P62_018754	317.287	32.4726	8.88519e-08	8.32346e-07	b
G4P62_018791	294.747	32.4568	8.95561e-08	8.38199e-07	b
G4P62_018808	640.522	61.4778	4.46957e-14	1.71903e-12	b
G4P62_018838	230.843	46.8699	6.64253e-11	1.2915e-09	b
G4P62_018840	957.726	71.7782	2.59151e-16	1.56342e-14	b
G4P62_018908	1574.64	102.682	5.04644e-23	1.19725e-20	b
G4P62_018920	251.954	56.9239	4.35654e-13	1.38537e-11	b
G4P62_018946	1470.38	46.2168	9.20758e-11	1.75785e-09	b
G4P62_018965	1894.53	85.4301	2.81242e-19	3.17563e-17	b
G4P62_018968	1807.93	58.8866	1.63281e-13	5.64269e-12	b
G4P62_018971	199.572	79.201	6.33455e-18	5.45935e-16	b
G4P62_018986	3016.85	69.6657	7.45228e-16	4.09778e-14	b
G4P62_018990	497.497	45.2215	1.5145e-10	2.76155e-09	b
G4P62_019003	336.709	51.7342	5.83536e-12	1.44957e-10	b
G4P62_019116	1173.34	63.728	1.45089e-14	6.10271e-13	b
G4P62_019127	2203.34	121.09	5.07833e-27	3.06368e-24	b
G4P62_019173	286.984	95.0008	2.34879e-21	3.90509e-19	b
G4P62_019178	58.209	41.4914	9.77817e-10	1.47476e-08	b
G4P62_019193	1246.55	68.0401	1.67991e-15	8.63048e-14	b
G4P62_019203	982.878	95.1142	2.21925e-21	3.74875e-19	b
G4P62_019205	1083.79	56.2644	6.05824e-13	1.87566e-11	b
G4P62_019209	430.749	43.7248	3.20091e-10	5.36832e-09	b
G4P62_019234	281.119	121.108	5.03255e-27	3.06368e-24	b
G4P62_019301	343.901	86.1361	1.97594e-19	2.33083e-17	b
G4P62_019303	466.281	48.7867	2.54747e-11	5.48876e-10	b
G4P62_019326	396.51	73.9336	8.82094e-17	5.91283e-15	b
G4P62_019332	375.642	69.7204	7.25122e-16	3.99764e-14	b
G4P62_019339	190.893	44.2096	2.5119e-10	4.32969e-09	b
G4P62_019371	1727.36	81.4454	2.06237e-18	1.98509e-16	b
G4P62_019377	469.568	43.2727	4.01284e-10	6.58873e-09	b
G4P62_019417	981.737	72.163	2.13803e-16	1.32002e-14	b
G4P62_019440	407.072	77.699	1.34238e-17	1.07794e-15	b
G4P62_019441	42.3942	48.3615	3.15094e-11	6.6333e-10	b
G4P62_019454	5248.86	40.4168	1.67338e-09	2.38096e-08	b
G4P62_019464	301.673	43.3647	3.8325e-10	6.31227e-09	b
G4P62_019520	950.622	52.8498	3.34057e-12	8.71894e-11	b
G4P62_019563	2632.05	89.3588	3.9444e-20	5.14111e-18	b
G4P62_019602	164.33	63.9888	1.27353e-14	5.45447e-13	b
G4P62_019641	110.044	54.0521	1.83119e-12	5.10101e-11	b
G4P62_019647	892.161	63.8164	1.3882e-14	5.8859e-13	b
G4P62_019661	1785.73	73.6143	1.0348e-16	6.82808e-15	b
G4P62_019687	944.596	37.6002	6.84265e-09	8.50898e-08	b
G4P62_019695	371.892	57.2187	3.75948e-13	1.21378e-11	b
G4P62_019697	1542.25	110.418	1.0545e-24	3.53424e-22	b
G4P62_019710	1132.7	106.4	7.86134e-24	2.10117e-21	b
G4P62_019727	1173.3	133.498	1.02641e-29	1.20404e-26	b
G4P62_019738	523.808	41.6634	8.97256e-10	1.36495e-08	b
G4P62_019760	2082.34	127.128	2.48059e-28	2.09511e-25	b
G4P62_019765	211.002	66.4762	3.67179e-15	1.75805e-13	b
G4P62_019799	2389.4	65.4996	5.98328e-15	2.77055e-13	b
G4P62_019832	28774.5	38.9684	3.45236e-09	4.57032e-08	b
G4P62_019839	1313.25	102.115	6.7e-23	1.52119e-20	b
G4P62_019886	1074.75	40.2641	1.80618e-09	2.55442e-08	b
G4P62_019908	1490.12	43.8688	2.97854e-10	5.04346e-09	b
G4P62_019913	629.132	53.2202	2.77568e-12	7.40942e-11	b
G4P62_019926	2607.37	117.431	3.16389e-26	1.51969e-23	b
G4P62_019927	553.391	80.7513	2.9179e-18	2.66716e-16	b
G4P62_019940	650.734	97.0812	8.30026e-22	1.524e-19	b
G4P62_020006	1166.94	34.2645	3.62701e-08	3.74313e-07	b
G4P62_020038	1238.39	80.1679	3.90628e-18	3.46559e-16	b
G4P62_020052	1547	35.6831	1.78445e-08	2.00953e-07	b
G4P62_020071	471.682	56.393	5.68093e-13	1.77183e-11	b
G4P62_020092	4159.14	44.1205	2.62637e-10	4.50494e-09	b
G4P62_020133	766.676	150.014	2.65973e-33	8.02289e-30	b
G4P62_020152	59.0887	41.2591	1.09827e-09	1.6331e-08	b
G4P62_020160	890.271	32.5702	8.4619e-08	7.9658e-07	b
G4P62_020173	814.026	35.6192	1.84245e-08	2.06383e-07	b
G4P62_020180	815.272	32.7005	7.92817e-08	7.5339e-07	b
G4P62_020187	819.857	35.2657	2.19858e-08	2.42317e-07	b
G4P62_020236	188.137	65.4924	6.00504e-15	2.77454e-13	b
G4P62_000171	368.808	75.2401	4.59013e-17	3.24149e-15	c
G4P62_000231	349.673	36.7139	1.06578e-08	1.26712e-07	c
G4P62_000442	510.89	35.7375	1.73664e-08	1.96407e-07	c
G4P62_000542	146.275	67.9742	1.73619e-15	8.87642e-14	c
G4P62_000993	1282.34	32.2098	1.0133e-07	9.3595e-07	c
G4P62_001188	395.783	32.3793	9.30942e-08	8.66322e-07	c
G4P62_001259	576.359	49.4247	1.85169e-11	4.11129e-10	c
G4P62_001575	396.865	42.0917	7.24265e-10	1.1253e-08	c
G4P62_001598	298.823	60.7238	6.51605e-14	2.4138e-12	c
G4P62_001638	296.6	36.5999	1.1283e-08	1.33143e-07	c
G4P62_001680	184.773	35.5155	1.94042e-08	2.16211e-07	c
G4P62_001934	464.731	47.7943	4.18399e-11	8.54327e-10	c
G4P62_002270	643.38	47.6768	4.43716e-11	8.97421e-10	c
G4P62_002551	191.604	39.0573	3.30228e-09	4.402e-08	c
G4P62_002759	53.06	32.7038	7.91525e-08	7.52501e-07	c
G4P62_003136	578.869	64.3133	1.08281e-14	4.67188e-13	c
G4P62_003522	1304.44	34.5091	3.20952e-08	3.37664e-07	c
G4P62_003524	35.0204	35.0792	2.41352e-08	2.63367e-07	c
G4P62_003578	402.64	35.2655	2.19881e-08	2.42317e-07	c
G4P62_003819	72.2398	91.9088	1.10217e-20	1.63889e-18	c
G4P62_004127	1628.29	38.2582	4.92414e-09	6.34757e-08	c
G4P62_004168	228.911	37.8706	5.97737e-09	7.52607e-08	c
G4P62_005012	358.457	40.7424	1.42199e-09	2.06359e-08	c
G4P62_005032	508.036	35.0962	2.39312e-08	2.61411e-07	c
G4P62_005089	70.3889	36.617	1.11869e-08	1.32298e-07	c
G4P62_005345	725.245	32.9947	6.84383e-08	6.61967e-07	c
G4P62_005357	226.274	34.0852	3.96736e-08	4.07247e-07	c
G4P62_005407	92.0766	34.597	3.07159e-08	3.2477e-07	c
G4P62_005710	371.233	36.5287	1.16918e-08	1.37228e-07	c
G4P62_005821	86.2415	37.3863	7.61489e-09	9.36995e-08	c
G4P62_006162	232.824	47.4375	5.00119e-11	9.96228e-10	c
G4P62_006300	1530.74	32.9978	6.8332e-08	6.61259e-07	c
G4P62_006859	404.176	50.1473	1.2902e-11	2.96437e-10	c
G4P62_007059	15.5682	32.5438	8.57435e-08	8.05371e-07	c
G4P62_007262	83.9859	37.4507	7.37359e-09	9.10487e-08	c
G4P62_007317	44.1669	32.4421	9.02179e-08	8.42526e-07	c
G4P62_007862	4197.4	60.7995	6.27427e-14	2.33242e-12	c
G4P62_007938	76.4984	35.9487	1.56257e-08	1.78925e-07	c
G4P62_008361	50.7294	37.7	6.50963e-09	8.12838e-08	c
G4P62_008394	113.985	38.2587	4.92304e-09	6.34757e-08	c
G4P62_008400	442.681	78.5309	8.85596e-18	7.37529e-16	c
G4P62_008479	86.6781	35.6536	1.811e-08	2.034e-07	c
G4P62_008829	272.117	46.1598	9.47365e-11	1.80375e-09	c
G4P62_008890	287.285	34.4166	3.3614e-08	3.50845e-07	c
G4P62_009042	192.202	34.9053	2.63269e-08	2.83763e-07	c
G4P62_009326	2034.15	36.7824	1.02991e-08	1.23e-07	c
G4P62_009609	55.4909	55.4242	9.22124e-13	2.75398e-11	c
G4P62_010304	2774.61	32.9372	7.04337e-08	6.79401e-07	c
G4P62_010356	137.446	40.5766	1.54488e-09	2.22815e-08	c
G4P62_010521	173.864	34.3937	3.40021e-08	3.54721e-07	c
G4P62_010727	408.837	45.9574	1.0483e-10	1.97159e-09	c
G4P62_010903	85.1488	36.5347	1.1657e-08	1.37048e-07	c
G4P62_010924	67.6869	34.1798	3.78403e-08	3.88996e-07	c
G4P62_011120	1322.43	32.8369	7.40547e-08	7.10757e-07	c
G4P62_011263	288.787	38.076	5.39386e-09	6.87749e-08	c
G4P62_011378	289.104	58.0928	2.42829e-13	8.08728e-12	c
G4P62_011860	5566.45	35.746	1.72924e-08	1.9578e-07	c
G4P62_012040	244.358	40.8423	1.35274e-09	1.97123e-08	c
G4P62_012128	70.1629	41.2703	1.0921e-09	1.62621e-08	c
G4P62_012131	85.7376	32.5976	8.34682e-08	7.87854e-07	c
G4P62_012578	169.688	35.2209	2.24846e-08	2.46886e-07	c
G4P62_012625	151.527	36.5992	1.12871e-08	1.33143e-07	c
G4P62_012741	469.512	37.9939	5.61991e-09	7.13127e-08	c
G4P62_012810	211.253	44.37	2.31837e-10	4.04231e-09	c
G4P62_012824	137.125	38.8057	3.74491e-09	4.92059e-08	c
G4P62_013004	137.934	35.7802	1.69994e-08	1.92877e-07	c
G4P62_013074	14789.4	109.488	1.67875e-24	5.37074e-22	c
G4P62_013379	331.82	44.2396	2.47451e-10	4.28273e-09	c
G4P62_013477	440.455	40.1332	1.92835e-09	2.70725e-08	c
[truncated: 16,661 more rows]

## Sheet: B
Gene	Mean expression	stat	pvalue	padj	dgepatterns cluster
G4P62_000039	1931.59	75.717	3.6162e-17	1.23619e-14	a
G4P62_000048	4146.06	73.3677	1.17058e-16	3.57718e-14	a
G4P62_000055	2851.37	58.4516	2.02957e-13	2.56132e-11	a
G4P62_000066	9293.39	56.6223	5.06546e-13	5.70296e-11	a
G4P62_000102	4830.15	53.311	2.65255e-12	2.55977e-10	a
G4P62_000216	790.165	43.1665	4.23162e-10	2.27679e-08	a
G4P62_000223	3131.14	72.1523	2.1494e-16	5.7041e-14	a
G4P62_000389	949.397	43.378	3.80697e-10	2.09217e-08	a
G4P62_000433	6803.75	43.2181	4.12399e-10	2.22994e-08	a
G4P62_000436	2309.33	47.891	3.98656e-11	2.84117e-09	a
G4P62_000556	2906.95	40.2856	1.78689e-09	8.29946e-08	a
G4P62_000565	7023.99	44.6361	2.02949e-10	1.21642e-08	a
G4P62_000572	1214.6	39.5081	2.63594e-09	1.16333e-07	a
G4P62_000596	3770.79	40.8268	1.36325e-09	6.45434e-08	a
G4P62_000641	2388.69	40.0139	2.04686e-09	9.29207e-08	a
G4P62_000655	4357.17	38.308	4.80318e-09	1.92118e-07	a
G4P62_000684	910.628	39.3984	2.78446e-09	1.21296e-07	a
G4P62_000737	7481.02	34.689	2.93345e-08	9.45125e-07	a
G4P62_000801	12541.3	36.4798	1.19815e-08	4.32298e-07	a
G4P62_000835	1664.71	58.2452	2.25016e-13	2.80145e-11	a
G4P62_000839	461.948	37.3594	7.71817e-09	2.89884e-07	a
G4P62_000850	25422.5	57.0001	4.19365e-13	4.82251e-11	a
G4P62_000892	1319.74	37.0337	9.08288e-09	3.34293e-07	a
G4P62_000898	1072.12	42.0877	7.25719e-10	3.67764e-08	a
G4P62_000990	70918.9	106.653	6.92647e-24	1.397e-20	a
G4P62_001030	1025.36	39.7853	2.29471e-09	1.02951e-07	a
G4P62_001056	2306	35.1424	2.33848e-08	7.74462e-07	a
G4P62_001080	487.498	38.2552	4.93161e-09	1.96185e-07	a
G4P62_001121	973.86	40.1151	1.94585e-09	8.89929e-08	a
G4P62_001126	7654.62	72.6223	1.69926e-16	4.82709e-14	a
G4P62_001137	17625.7	52.9568	3.16656e-12	2.94315e-10	a
G4P62_001149	8405.92	47.9774	3.81807e-11	2.73073e-09	a
G4P62_001371	4467.71	77.608	1.40484e-17	5.55575e-15	a
G4P62_001378	2052.72	34.894	2.64761e-08	8.61284e-07	a
G4P62_001494	5952.92	43.5397	3.51134e-10	1.97271e-08	a
G4P62_001507	8920.38	78.4327	9.3017e-18	3.82869e-15	a
G4P62_001536	1459.53	42.9978	4.60421e-10	2.45667e-08	a
G4P62_001549	5225.73	38.4085	4.56775e-09	1.85366e-07	a
G4P62_001555	4149.26	51.0669	8.1464e-12	6.84603e-10	a
G4P62_001581	1838.9	59.7365	1.06752e-13	1.48488e-11	a
G4P62_001650	16052.9	54.6113	1.38458e-12	1.41754e-10	a
G4P62_001691	1506.16	38.3867	4.61768e-09	1.86791e-07	a
G4P62_001702	3467.74	36.2252	1.36079e-08	4.85768e-07	a
G4P62_001800	1566.73	40.2744	1.79694e-09	8.31249e-08	a
G4P62_001851	2971.89	64.2963	1.09202e-14	1.88248e-12	a
G4P62_001878	11826.6	70.8428	4.13693e-16	1.04297e-13	a
G4P62_001885	2103.16	54.3126	1.60753e-12	1.63749e-10	a
G4P62_001936	2416.97	79.5623	5.28771e-18	2.31843e-15	a
G4P62_001940	727.573	39.0794	3.26602e-09	1.39265e-07	a
G4P62_001945	81.1778	44.0305	2.74719e-10	1.5741e-08	a
G4P62_001962	5606.94	50.9323	8.71342e-12	7.29215e-10	a
G4P62_002025	7599.26	38.3492	4.70525e-09	1.89416e-07	a
G4P62_002026	242.616	37.8952	5.90415e-09	2.28562e-07	a
G4P62_002058	12233.7	67.0306	2.78286e-15	5.72731e-13	a
G4P62_002253	1272.72	45.6928	1.19656e-10	7.6131e-09	a
G4P62_002263	1652.44	40.9829	1.26086e-09	6.06927e-08	a
G4P62_002271	3689.44	79.5874	5.22169e-18	2.31843e-15	a
G4P62_002367	2476.22	47.6775	4.43572e-11	3.12811e-09	a
G4P62_002394	347.625	38.0892	5.35847e-09	2.09854e-07	a
G4P62_002424	5839.95	69.6178	7.63266e-16	1.8111e-13	a
G4P62_002444	2727.43	50.1766	1.27145e-11	1.00172e-09	a
G4P62_002463	3458.41	43.1573	4.25115e-10	2.28036e-08	a
G4P62_002501	6369.93	46.0558	9.97971e-11	6.49293e-09	a
G4P62_002548	3199.44	40.8567	1.34299e-09	6.37336e-08	a
G4P62_002557	251.793	35.0298	2.47384e-08	8.16609e-07	a
G4P62_002708	8578.21	57.0419	4.10686e-13	4.76042e-11	a
G4P62_002778	715.07	36.8806	9.80567e-09	3.5893e-07	a
G4P62_002827	651.18	95.1982	2.12797e-21	2.04376e-18	a
G4P62_002959	427.894	51.3672	7.01071e-12	6.06863e-10	a
G4P62_002965	21440.7	83.3932	7.78728e-19	4.48748e-16	a
G4P62_002985	5283.46	49.1172	2.1594e-11	1.63732e-09	a
G4P62_003014	1421.91	82.752	1.07309e-18	6.01201e-16	a
G4P62_003043	5064.52	36.521	1.1737e-08	4.24237e-07	a
G4P62_003051	6867.16	101.458	9.3028e-23	1.44329e-19	a
G4P62_003154	1913.83	39.1895	3.09111e-09	1.33215e-07	a
G4P62_003227	2998.33	40.7036	1.44986e-09	6.84832e-08	a
G4P62_003232	2678.86	41.9562	7.75064e-10	3.90806e-08	a
G4P62_003255	1361.84	37.9695	5.6888e-09	2.21074e-07	a
G4P62_003268	530.828	46.2481	9.06461e-11	6.01395e-09	a
G4P62_003294	578.931	53.1388	2.89109e-12	2.73757e-10	a
G4P62_003317	2502.97	41.6393	9.08132e-10	4.46735e-08	a
G4P62_003359	61.0099	44.077	2.6841e-10	1.54673e-08	a
G4P62_003365	1103.08	44.2453	2.46747e-10	1.43419e-08	a
G4P62_003392	13468.5	74.9659	5.26447e-17	1.74064e-14	a
G4P62_003445	868.267	40.2147	1.85139e-09	8.50584e-08	a
G4P62_003495	5860.13	43.4015	3.76256e-10	2.08481e-08	a
G4P62_003506	319.434	35.2434	2.22332e-08	7.41192e-07	a
G4P62_003588	1558.33	47.4808	4.89414e-11	3.42743e-09	a
G4P62_003593	824.211	53.0954	2.95447e-12	2.78452e-10	a
G4P62_003609	1240.95	40.9755	1.26555e-09	6.07737e-08	a
G4P62_003624	3242.97	39.3896	2.79673e-09	1.21567e-07	a
G4P62_003656	281.642	39.5931	2.52614e-09	1.11978e-07	a
G4P62_003690	544.548	45.8285	1.11807e-10	7.15884e-09	a
G4P62_003758	9807.73	40.4389	1.655e-09	7.79897e-08	a
G4P62_003772	827.25	51.1512	7.81026e-12	6.6187e-10	a
G4P62_003797	9337.45	45.939	1.05799e-10	6.83932e-09	a
G4P62_003868	4576.15	114.15	1.6318e-25	5.4853e-22	a
G4P62_003909	451.133	35.3079	2.15273e-08	7.26061e-07	a
G4P62_003922	9108.99	39.5327	2.60366e-09	1.1516e-07	a
G4P62_004042	1124.14	70.6423	4.57328e-16	1.13875e-13	a
G4P62_004069	489.035	42.1616	6.9939e-10	3.55315e-08	a
G4P62_004105	1922.46	34.9151	2.61984e-08	8.59181e-07	a
G4P62_004117	2059.01	46.9482	6.38757e-11	4.382e-09	a
G4P62_004189	22358.9	76.2611	2.75487e-17	9.74791e-15	a
G4P62_004197	844.12	47.4606	4.9439e-11	3.4503e-09	a
G4P62_004199	6752.79	61.9521	3.52594e-14	5.47036e-12	a
G4P62_004212	1549.34	119.422	1.1692e-26	5.8954e-23	a
G4P62_004310	3345.43	40.9085	1.30868e-09	6.23988e-08	a
G4P62_004400	7809.19	38.7838	3.7862e-09	1.58103e-07	a
G4P62_004513	22961.4	36.1608	1.40532e-08	5.00775e-07	a
G4P62_004649	834.584	48.2792	3.28327e-11	2.39062e-09	a
G4P62_004793	1622.76	41.6211	9.16402e-10	4.49706e-08	a
G4P62_004878	2286.86	36.9848	9.30775e-09	3.41945e-07	a
G4P62_004894	7083.55	101.284	1.01486e-22	1.46205e-19	a
G4P62_004900	1124.35	65.4582	6.10854e-15	1.1303e-12	a
G4P62_004951	820.916	36.1009	1.44807e-08	5.13289e-07	a
G4P62_004966	1656.78	59.2988	1.32871e-13	1.77476e-11	a
G4P62_005003	2879.88	58.4368	2.04459e-13	2.56132e-11	a
G4P62_005085	4048.03	46.1142	9.69219e-11	6.36748e-09	a
G4P62_005316	1831.27	38.0208	5.54476e-09	2.1631e-07	a
G4P62_005369	499.547	63.4005	1.70909e-14	2.80688e-12	a
G4P62_005406	753.019	59.7158	1.07867e-13	1.49011e-11	a
G4P62_005426	2196.39	37.1685	8.49126e-09	3.14817e-07	a
G4P62_005443	8096.18	40.8626	1.33905e-09	6.36964e-08	a
G4P62_005450	6289.53	68.9811	1.04939e-15	2.35169e-13	a
G4P62_005479	5745.86	44.1393	2.60185e-10	1.50795e-08	a
G4P62_005509	949.883	38.3851	4.62139e-09	1.86791e-07	a
G4P62_005534	28249.5	88.9938	4.73421e-20	3.53646e-17	a
G4P62_005540	2518.68	37.9364	5.78391e-09	2.24338e-07	a
G4P62_005596	1272.89	43.8001	3.08261e-10	1.74644e-08	a
G4P62_005599	2001.19	65.7836	5.19137e-15	9.78549e-13	a
G4P62_005607	2562.2	44.6155	2.05059e-10	1.21642e-08	a
G4P62_005646	1436.32	85.1535	3.22956e-19	2.03553e-16	a
G4P62_005662	1193.24	38.2877	4.85213e-09	1.93405e-07	a
G4P62_005663	199.092	41.7312	8.67322e-10	4.28751e-08	a
G4P62_005696	5689.76	38.5747	4.20346e-09	1.72667e-07	a
G4P62_005791	2211.03	76.859	2.04306e-17	7.77481e-15	a
G4P62_005803	2272.87	71.9667	2.35842e-16	6.17753e-14	a
G4P62_005831	692.942	37.7765	6.2653e-09	2.41615e-07	a
G4P62_005925	2985.36	64.841	8.31694e-15	1.47144e-12	a
G4P62_005933	4470.24	54.1559	1.7386e-12	1.74456e-10	a
G4P62_005963	3305.29	43.882	2.95904e-10	1.6859e-08	a
G4P62_005966	3563.76	36.0219	1.50645e-08	5.2841e-07	a
G4P62_006007	1807.59	37.5559	6.9957e-09	2.66723e-07	a
G4P62_006062	1375.66	52.793	3.43669e-12	3.17957e-10	a
G4P62_006084	1882.4	62.8543	2.24576e-14	3.59482e-12	a
G4P62_006112	1123.85	38.2082	5.049e-09	2.00065e-07	a
G4P62_006237	5329.97	46.1473	9.53342e-11	6.28364e-09	a
G4P62_006257	1941.6	49.2743	1.99625e-11	1.51933e-09	a
G4P62_006298	4248.95	62.5722	2.58588e-14	4.10667e-12	a
G4P62_006438	14844.3	52.6211	3.74522e-12	3.44919e-10	a
G4P62_006497	1809.99	36.0558	1.48113e-08	5.22253e-07	a
G4P62_006540	453.079	34.9044	2.63392e-08	8.61284e-07	a
G4P62_006569	2764.74	41.3031	1.07438e-09	5.23408e-08	a
G4P62_006573	2024.18	40.4133	1.67631e-09	7.82629e-08	a
G4P62_006586	668.651	42.4922	5.92829e-10	3.07372e-08	a
G4P62_006617	13916.5	77.254	1.67693e-17	6.50423e-15	a
G4P62_006657	751.563	39.9046	2.1619e-09	9.73289e-08	a
G4P62_006713	5789.09	35.9829	1.53607e-08	5.37865e-07	a
G4P62_006793	2007.84	39.1153	3.20786e-09	1.37075e-07	a
G4P62_006841	3381.11	50.3255	1.1802e-11	9.48343e-10	a
G4P62_006895	1060.01	41.2651	1.09496e-09	5.32151e-08	a
G4P62_006975	962.811	87.3745	1.06382e-19	6.92136e-17	a
G4P62_006976	1889.69	59.4899	1.20761e-13	1.63761e-11	a
G4P62_007065	1907.71	41.7417	8.62771e-10	4.27549e-08	a
G4P62_007084	2626.27	52.4144	4.15293e-12	3.75607e-10	a
G4P62_007128	1531.45	50.7166	9.70556e-12	7.92516e-10	a
G4P62_007183	1768.18	39.1271	3.189e-09	1.36558e-07	a
G4P62_007201	1091.4	83.9691	5.8391e-19	3.51391e-16	a
G4P62_007204	5120.18	39.6817	2.41674e-09	1.08078e-07	a
G4P62_007212	702.847	55.163	1.05079e-12	1.10382e-10	a
G4P62_007234	2638.49	39.4205	2.75388e-09	1.20746e-07	a
G4P62_007294	802.654	140.906	2.52707e-31	5.09685e-27	a
G4P62_007328	2064.4	44.9151	1.76524e-10	1.07888e-08	a
G4P62_007379	232.941	55.8484	7.45876e-13	8.0447e-11	a
G4P62_007410	908.792	47.3079	5.33593e-11	3.6983e-09	a
G4P62_007424	6194.8	52.4537	4.07224e-12	3.69968e-10	a
G4P62_007435	11074.7	66.2842	4.0417e-15	7.83817e-13	a
G4P62_007509	162.694	43.4443	3.68294e-10	2.04632e-08	a
G4P62_007512	1433.05	37.5262	7.10066e-09	2.69705e-07	a
G4P62_007587	1933.64	54.0909	1.79603e-12	1.79327e-10	a
G4P62_007626	762.04	81.6034	1.90564e-18	9.60869e-16	a
G4P62_007627	3727.12	39.9302	2.13434e-09	9.6303e-08	a
G4P62_007646	1143.69	41.7451	8.61322e-10	4.27549e-08	a
G4P62_007691	4830.09	45.9715	1.04093e-10	6.75067e-09	a
G4P62_007727	2507.23	55.3046	9.78947e-13	1.03918e-10	a
G4P62_007794	1039.26	36.0866	1.45849e-08	5.16076e-07	a
G4P62_007816	8560.78	57.4657	3.32262e-13	3.94199e-11	a
G4P62_007895	3563.02	42.5304	5.81609e-10	3.02332e-08	a
G4P62_008023	2380.61	72.5929	1.72442e-16	4.83053e-14	a
G4P62_008126	13744.1	52.4732	4.03255e-12	3.6802e-10	a
G4P62_008136	2327.09	60.5201	7.21501e-14	1.0469e-11	a
G4P62_008144	141.969	45.2762	1.47365e-10	9.0893e-09	a
G4P62_008178	1791.48	43.2344	4.09037e-10	2.21771e-08	a
G4P62_008268	4066.73	65.2353	6.82863e-15	1.24078e-12	a
G4P62_008273	3983.81	45.344	1.42456e-10	8.95079e-09	a
G4P62_008285	1540.03	43.2395	4.07998e-10	2.21771e-08	a
G4P62_008341	3246.89	45.1184	1.59466e-10	9.8057e-09	a
G4P62_008379	6173.83	54.1916	1.70782e-12	1.72225e-10	a
G4P62_008436	2695.8	68.8047	1.1462e-15	2.5404e-13	a
G4P62_008442	2010.27	35.3963	2.05963e-08	6.99339e-07	a
G4P62_008531	3179.37	55.0784	1.09616e-12	1.13961e-10	a
G4P62_008681	2225.78	63.9707	1.28509e-14	2.17806e-12	a
G4P62_008745	5214.54	72.4962	1.80991e-16	5.00055e-14	a
G4P62_008776	9315.05	87.5712	9.64162e-20	6.70558e-17	a
G4P62_008817	3658.86	74.4712	6.74187e-17	2.15836e-14	a
G4P62_008845	8578.67	38.8087	3.73942e-09	1.56474e-07	a
G4P62_008875	6548.07	37.6456	6.68887e-09	2.56479e-07	a
G4P62_008892	5266.41	57.8102	2.79685e-13	3.39817e-11	a
G4P62_008893	6643.38	57.177	3.83862e-13	4.47521e-11	a
G4P62_008902	5759.54	60.0824	8.98009e-14	1.28454e-11	a
G4P62_008920	4396.27	50.215	1.24726e-11	9.86512e-10	a
G4P62_009035	5174.98	58.5213	1.96001e-13	2.51634e-11	a
G4P62_009065	4081.68	69.6746	7.41897e-16	1.78135e-13	a
G4P62_009133	1971.86	52.0361	5.01781e-12	4.45834e-10	a
G4P62_009224	2779.26	51.2709	7.35641e-12	6.31368e-10	a
G4P62_009245	1859.3	43.9498	2.86032e-10	1.63427e-08	a
G4P62_009319	168.869	35.1537	2.32529e-08	7.71362e-07	a
G4P62_009331	1247.03	51.1994	7.62425e-12	6.51583e-10	a
G4P62_009339	1188.31	35.6024	1.858e-08	6.37311e-07	a
G4P62_009420	6243.05	49.7914	1.5415e-11	1.20506e-09	a
G4P62_009439	1697.75	45.6169	1.24282e-10	7.85782e-09	a
G4P62_009443	1452.89	42.9742	4.65884e-10	2.47443e-08	a
G4P62_009504	1553.53	43.533	3.5231e-10	1.97382e-08	a
G4P62_009516	171.172	42.5718	5.69694e-10	2.96903e-08	a
G4P62_009537	1894.62	36.2684	1.3317e-08	4.76602e-07	a
G4P62_009567	2096.57	39.6446	2.46203e-09	1.09469e-07	a
G4P62_009573	3114.68	49.4963	1.78657e-11	1.37009e-09	a
G4P62_009654	148.072	48.149	3.50415e-11	2.52411e-09	a
G4P62_009659	7637.58	39.2508	2.99774e-09	1.30024e-07	a
G4P62_009668	1760.69	36.428	1.22959e-08	4.41272e-07	a
G4P62_009679	3006.04	59.7824	1.04329e-13	1.46126e-11	a
G4P62_009720	871.546	82.5466	1.18914e-18	6.48209e-16	a
G4P62_009743	5271.74	51.6871	5.97421e-12	5.21619e-10	a
G4P62_009789	790.921	35.3321	2.12681e-08	7.18521e-07	a
G4P62_009858	1615.23	36.7099	1.06794e-08	3.88094e-07	a
G4P62_009928	250.43	38.5301	4.29828e-09	1.75846e-07	a
G4P62_009973	2853	43.4903	3.5992e-10	2.00531e-08	a
G4P62_010090	929.418	38.6604	4.02727e-09	1.66447e-07	a
G4P62_010120	299.166	37.0506	9.00647e-09	3.32695e-07	a
G4P62_010223	810.347	38.3529	4.69646e-09	1.89416e-07	a
G4P62_010253	635.407	65.4045	6.27458e-15	1.15047e-12	a
G4P62_010258	4702.16	72.6583	1.66896e-16	4.80876e-14	a
G4P62_010523	5001.61	47.0213	6.15812e-11	4.23902e-09	a
G4P62_010575	2600.71	40.0275	2.03303e-09	9.256e-08	a
G4P62_010666	2327.02	50.8123	9.25208e-12	7.62477e-10	a
G4P62_010696	6967.22	34.7635	2.82623e-08	9.13496e-07	a
G4P62_010728	859.793	42.9728	4.66203e-10	2.47443e-08	a
G4P62_010740	3456.89	34.8978	2.64264e-08	8.61284e-07	a
G4P62_010770	12031.7	65.525	5.90779e-15	1.10328e-12	a
G4P62_010774	703.067	57.6286	3.06274e-13	3.67693e-11	a
G4P62_010888	1029.05	44.8399	1.8329e-10	1.11349e-08	a
G4P62_010969	1893.03	42.9445	4.72843e-10	2.50309e-08	a
G4P62_010997	306.697	36.912	9.6531e-09	3.53988e-07	a
G4P62_011062	6396.95	97.4571	6.8778e-22	6.93591e-19	a
G4P62_011071	1342.41	35.27	2.19389e-08	7.34282e-07	a
G4P62_011200	2299.47	43.3941	3.77652e-10	2.08681e-08	a
G4P62_011334	1756.35	38.5169	4.32672e-09	1.76651e-07	a
G4P62_011344	2363.36	44.6163	2.04974e-10	1.21642e-08	a
G4P62_011403	1077.67	49.8431	1.50214e-11	1.17886e-09	a
G4P62_011541	1806.52	44.3715	2.31664e-10	1.35433e-08	a
G4P62_011577	4439.68	41.6456	9.05256e-10	4.46408e-08	a
G4P62_011605	5742.74	35.2728	2.19079e-08	7.34282e-07	a
G4P62_011612	3819.84	65.9297	4.82556e-15	9.18177e-13	a
G4P62_011659	3001.7	74.8769	5.50423e-17	1.79056e-14	a
G4P62_011713	2446.03	48.5631	2.84875e-11	2.09905e-09	a
G4P62_011723	5090.56	97.5111	6.69476e-22	6.93591e-19	a
G4P62_011730	7172.61	60.7776	6.34332e-14	9.33858e-12	a
G4P62_011732	345.831	35.0304	2.4731e-08	8.16609e-07	a
G4P62_011741	2548.58	51.788	5.68049e-12	5.00305e-10	a
G4P62_011803	7856.57	69.3977	8.52065e-16	1.97532e-13	a
G4P62_011842	3095.39	49.6837	1.62678e-11	1.26194e-09	a
G4P62_011852	1531.3	43.6089	3.392e-10	1.91634e-08	a
G4P62_011952	4782.11	56.008	6.88665e-13	7.50794e-11	a
G4P62_011983	4561.09	72.335	1.96176e-16	5.27557e-14	a
G4P62_011999	2581.66	46.7313	7.119e-11	4.81823e-09	a
G4P62_012015	1134.24	38.8477	3.66708e-09	1.53766e-07	a
G4P62_012039	1986.15	76.5979	2.328e-17	8.46169e-15	a
G4P62_012216	5524.45	76.8064	2.09749e-17	7.83414e-15	a
G4P62_012319	544.677	75.7221	3.60705e-17	1.23619e-14	a
G4P62_012517	1582.58	58.5099	1.97125e-13	2.51634e-11	a
G4P62_012637	1298.19	55.0055	1.13685e-12	1.17586e-10	a
G4P62_012670	989.565	35.5603	1.89748e-08	6.4865e-07	a
G4P62_012706	1092.47	69.4589	8.26416e-16	1.93814e-13	a
G4P62_012745	5491.62	57.7505	2.88163e-13	3.48021e-11	a
G4P62_012791	1582.08	38.6519	4.0443e-09	1.66809e-07	a
G4P62_012815	274.065	35.3553	2.10229e-08	7.11427e-07	a
G4P62_012841	7220.99	97.7762	5.86364e-22	6.57021e-19	a
G4P62_012842	6071.84	36.1277	1.42876e-08	5.07337e-07	a
G4P62_012857	2685.83	54.2299	1.67547e-12	1.69812e-10	a
G4P62_012872	1889.32	40.2264	1.84054e-09	8.47531e-08	a
G4P62_012939	3542.44	88.2076	7.01383e-20	5.05221e-17	a
G4P62_012970	3239.98	34.7774	2.80657e-08	9.08599e-07	a
G4P62_012983	11360.2	58.9994	1.54327e-13	2.02118e-11	a
G4P62_012991	5837.49	56.9931	4.20825e-13	4.82251e-11	a
G4P62_013018	11732.5	37.4542	7.36077e-09	2.76976e-07	a
G4P62_013099	2640.08	100.189	1.75502e-22	2.3598e-19	a
G4P62_013128	8062.29	43.3798	3.80354e-10	2.09217e-08	a
G4P62_013186	2266.99	37.2884	7.99703e-09	2.98689e-07	a
G4P62_013216	9743.86	71.1309	3.58198e-16	9.14493e-14	a
G4P62_013244	4136.25	49.5871	1.70726e-11	1.3193e-09	a
G4P62_013256	2958.72	42.4759	5.97704e-10	3.09105e-08	a
G4P62_013270	1761.19	45.2834	1.46838e-10	9.08459e-09	a
G4P62_013395	13702.2	38.1652	5.15872e-09	2.03574e-07	a
G4P62_013480	2402.15	49.2994	1.97135e-11	1.50607e-09	a
G4P62_013613	8455.65	54.8347	1.23825e-12	1.27419e-10	a
G4P62_013778	8049.27	58.4491	2.03212e-13	2.56132e-11	a
G4P62_013800	1817.02	43.0961	4.38327e-10	2.34499e-08	a
G4P62_013803	3786.14	111.425	6.37384e-25	1.83649e-21	a
G4P62_013896	3753.17	63.6382	1.51754e-14	2.5506e-12	a
G4P62_013940	2826.62	39.4022	2.77922e-09	1.21296e-07	a
G4P62_013952	4560.22	93.7879	4.30735e-21	3.89386e-18	a
G4P62_014032	2904.04	80.1593	3.92319e-18	1.79834e-15	a
G4P62_014053	5115.31	80.7128	2.97471e-18	1.4285e-15	a
G4P62_014107	880.136	73.2582	1.23648e-16	3.72216e-14	a
G4P62_014108	1434.72	60.1078	8.86677e-14	1.27739e-11	a
G4P62_014109	2087.53	35.1728	2.30314e-08	7.65273e-07	a
G4P62_014130	2332.47	37.2542	8.13496e-09	3.02719e-07	a
G4P62_014148	2036.45	83.9403	5.92359e-19	3.51391e-16	a
G4P62_014239	89400.1	53.6609	2.22679e-12	2.1802e-10	a
G4P62_014346	370.612	38.1309	5.24779e-09	2.05956e-07	a
G4P62_014363	8837.98	90.0821	2.74735e-20	2.13121e-17	a
G4P62_014372	10450	73.1037	1.33578e-16	3.96195e-14	a
G4P62_014570	5045.82	56.2034	6.24586e-13	6.84635e-11	a
G4P62_014650	256.447	38.7552	3.84069e-09	1.59717e-07	a
G4P62_014747	9081.46	73.9286	8.843e-17	2.78679e-14	a
G4P62_014779	3806.72	35.5077	1.94809e-08	6.64823e-07	a
G4P62_014840	1416.51	57.5227	3.22933e-13	3.85398e-11	a
G4P62_014841	6572.51	59.4863	1.2098e-13	1.63761e-11	a
G4P62_014868	142.643	38.8687	3.62892e-09	1.52483e-07	a
G4P62_014906	1270.13	60.7362	6.47598e-14	9.46479e-12	a
G4P62_014920	5158.5	67.6376	2.05439e-15	4.33478e-13	a
G4P62_014970	81182.9	98.753	3.59799e-22	4.2687e-19	a
G4P62_014975	2730.96	58.2251	2.27288e-13	2.81238e-11	a
G4P62_015095	5822.05	38.1616	5.16783e-09	2.03574e-07	a
G4P62_015173	743.735	59.5784	1.15536e-13	1.5852e-11	a
G4P62_015247	945.546	50.7669	9.46454e-12	7.75977e-10	a
G4P62_015254	1433.43	79.1187	6.60064e-18	2.83252e-15	a
G4P62_015362	6225.83	48.171	3.46584e-11	2.50547e-09	a
G4P62_015380	3868	55.6688	8.15971e-13	8.7539e-11	a
G4P62_015394	815.978	36.7032	1.07151e-08	3.8869e-07	a
G4P62_015455	8250.82	105.051	1.54323e-23	2.82959e-20	a
G4P62_015509	4264.27	50.3017	1.19432e-11	9.55886e-10	a
G4P62_015513	4499.2	59.156	1.42702e-13	1.89352e-11	a
G4P62_015527	5668.42	78.137	1.07837e-17	4.34993e-15	a
G4P62_015538	27732.4	67.6013	2.09199e-15	4.34982e-13	a
G4P62_015548	4187.94	50.2542	1.22306e-11	9.75016e-10	a
G4P62_015551	2645.05	59.1178	1.45459e-13	1.91749e-11	a
G4P62_015567	1648.67	46.2091	9.24335e-11	6.11243e-09	a
G4P62_015576	1984.16	40.0107	2.05016e-09	9.29207e-08	a
G4P62_015577	1386.58	53.4878	2.42808e-12	2.36579e-10	a
G4P62_015605	477.592	67.629	2.06326e-15	4.33478e-13	a
G4P62_015660	2214.25	53.0484	3.0248e-12	2.83755e-10	a
G4P62_015713	11598.3	57.3487	3.5228e-13	4.13089e-11	a
G4P62_015754	969.692	63.3973	1.71177e-14	2.80688e-12	a
G4P62_015816	23764.4	98.9444	3.26963e-22	4.12157e-19	a
G4P62_015826	5094.22	45.0129	1.68102e-10	1.03053e-08	a
G4P62_015856	1974.39	39.1576	3.14079e-09	1.35067e-07	a
G4P62_015891	1459.56	102.874	4.58413e-23	7.70478e-20	a
G4P62_016002	7116.33	59.9358	9.66284e-14	1.36287e-11	a
G4P62_016096	111.667	35.951	1.56075e-08	5.44616e-07	a
G4P62_016108	777.527	48.9598	2.3362e-11	1.75163e-09	a
G4P62_016186	2394.55	57.8748	2.70798e-13	3.31013e-11	a
G4P62_016228	7091.48	55.1037	1.08237e-12	1.1311e-10	a
G4P62_016255	2096.32	57.4053	3.42455e-13	4.03917e-11	a
G4P62_016311	1095.25	41.0484	1.22025e-09	5.88785e-08	a
G4P62_016396	4071.59	71.7151	2.67457e-16	6.91582e-14	a
G4P62_016543	4122.97	75.1173	4.8807e-17	1.64065e-14	a
G4P62_016594	6853.48	93.7271	4.44042e-21	3.89386e-18	a
G4P62_016595	8156.75	69.2357	9.23983e-16	2.11771e-13	a
G4P62_016623	1610.57	56.9599	4.27869e-13	4.87553e-11	a
G4P62_016631	256.158	36.0642	1.47492e-08	5.20974e-07	a
G4P62_016650	1576.54	48.9746	2.31905e-11	1.74526e-09	a
G4P62_016655	1315.98	40.4251	1.66648e-09	7.81315e-08	a
G4P62_016674	631.006	56.6128	5.08966e-13	5.70296e-11	a
G4P62_016738	1923.01	40.2404	1.8277e-09	8.43543e-08	a
G4P62_016766	5054.51	53.281	2.69266e-12	2.5861e-10	a
G4P62_016829	2387.92	53.9823	1.89624e-12	1.86562e-10	a
G4P62_016879	2125.34	52.3576	4.27249e-12	3.82986e-10	a
G4P62_016891	8180.57	45.2846	1.4675e-10	9.08459e-09	a
G4P62_016894	27245.4	107.071	5.62025e-24	1.2595e-20	a
G4P62_016972	1703.64	70.2527	5.55679e-16	1.36677e-13	a
G4P62_017007	3701.38	50.5629	1.04809e-11	8.52378e-10	a
G4P62_017058	4718.45	37.277	8.04254e-09	2.99834e-07	a
G4P62_017082	6718.19	45.3099	1.44904e-10	9.06666e-09	a
G4P62_017148	3522.69	52.551	3.87873e-12	3.55591e-10	a
G4P62_017232	1240.69	38.0565	5.44677e-09	2.12899e-07	a
G4P62_017246	8338.51	55.1778	1.04302e-12	1.10139e-10	a
G4P62_017306	2661.82	50.8819	8.93593e-12	7.41682e-10	a
G4P62_017322	719.978	38.1306	5.24873e-09	2.05956e-07	a
G4P62_017358	2070.52	61.6427	4.11594e-14	6.28896e-12	a
G4P62_017373	2352.44	42.3423	6.38967e-10	3.27238e-08	a
G4P62_017381	4891.18	53.1734	2.84154e-12	2.71616e-10	a
G4P62_017442	1092.32	37.6197	6.77635e-09	2.5934e-07	a
G4P62_017595	2207.75	45.6953	1.19504e-10	7.6131e-09	a
G4P62_017600	2438.2	58.8276	1.68174e-13	2.18832e-11	a
G4P62_017634	773.797	51.421	6.8246e-12	5.93299e-10	a
G4P62_017650	864.915	44.7172	1.9489e-10	1.17687e-08	a
G4P62_017672	1516.19	51.3417	7.10062e-12	6.12019e-10	a
G4P62_017675	1686.68	36.2669	1.33276e-08	4.76602e-07	a
G4P62_017814	4162.24	48.8881	2.42151e-11	1.80887e-09	a
G4P62_017862	479.912	45.8419	1.11063e-10	7.13384e-09	a
G4P62_017905	3840.18	66.5624	3.51693e-15	7.09329e-13	a
G4P62_017929	5175.57	58.1577	2.35078e-13	2.89103e-11	a
G4P62_018028	25867.8	41.1423	1.16432e-09	5.63145e-08	a
G4P62_018039	2046.32	44.0707	2.69257e-10	1.54719e-08	a
G4P62_018068	2501.79	68.7333	1.18784e-15	2.60409e-13	a
G4P62_018118	614.609	64.8818	8.14885e-15	1.45446e-12	a
G4P62_018179	1524.63	36.5743	1.14286e-08	4.13831e-07	a
G4P62_018183	1406.1	64.985	7.7389e-15	1.39362e-12	a
G4P62_018207	4105.76	38.305	4.81033e-09	1.92118e-07	a
G4P62_018220	2996.42	80.5755	3.18601e-18	1.49439e-15	a
G4P62_018314	2197.95	46.3125	8.77765e-11	5.88161e-09	a
G4P62_018317	705.506	41.9841	7.64298e-10	3.86344e-08	a
G4P62_018343	788.403	52.3315	4.32865e-12	3.86303e-10	a
G4P62_018370	1566.77	73.4934	1.09928e-16	3.41099e-14	a
G4P62_018428	51966.4	35.2654	2.19895e-08	7.34282e-07	a
G4P62_018463	2579.6	43.3198	3.91943e-10	2.14812e-08	a
G4P62_018499	1611.56	37.4566	7.35179e-09	2.76976e-07	a
G4P62_018505	4108.23	50.4464	1.11098e-11	8.96298e-10	a
G4P62_018517	2366.17	91.6094	1.2802e-20	1.07585e-17	a
G4P62_018604	1300.7	35.4252	2.03008e-08	6.90467e-07	a
G4P62_018673	1032.6	42.8572	4.93934e-10	2.60789e-08	a
G4P62_018727	2214.44	81.5372	1.96981e-18	9.69001e-16	a
G4P62_018734	423.427	69.1463	9.66197e-16	2.18958e-13	a
G4P62_018742	2247.23	55.6112	8.39809e-13	8.96196e-11	a
G4P62_018763	1673.33	38.3413	4.72389e-09	1.89416e-07	a
G4P62_018837	3266.48	87.5025	9.97894e-20	6.70884e-17	a
G4P62_018867	11263.1	82.274	1.36276e-18	7.23303e-16	a
G4P62_018902	1253.3	42.3512	6.36144e-10	3.27238e-08	a
G4P62_018959	4655.88	72.3796	1.91849e-16	5.22891e-14	a
G4P62_018960	2468.56	48.3988	3.09265e-11	2.25998e-09	a
G4P62_018962	927.059	38.3436	4.71847e-09	1.89416e-07	a
G4P62_018973	15146.4	53.1578	2.86368e-12	2.72442e-10	a
G4P62_018978	5093.73	46.2716	8.9589e-11	5.98318e-09	a
G4P62_018985	2889.04	67.8386	1.85799e-15	3.98658e-13	a
G4P62_018991	4338	61.3871	4.67693e-14	6.98734e-12	a
G4P62_019010	1828.84	64.6167	9.30385e-15	1.61767e-12	a
G4P62_019060	16045.8	49.7712	1.55713e-11	1.21257e-09	a
G4P62_019109	7972.36	55.8619	7.40871e-13	8.03367e-11	a
G4P62_019138	5658.3	39.1326	3.18027e-09	1.36474e-07	a
G4P62_019175	8423.09	54.0593	1.82465e-12	1.81288e-10	a
G4P62_019200	2817.77	38.7585	3.83436e-09	1.59717e-07	a
G4P62_019222	9859.96	62.1502	3.19349e-14	5.032e-12	a
G4P62_019252	704.159	34.6478	2.99453e-08	9.63264e-07	a
G4P62_019330	2303.11	44.4625	2.21357e-10	1.30542e-08	a
G4P62_019339	1715.97	62.0502	3.35722e-14	5.24897e-12	a
G4P62_019413	786.25	49.0131	2.27481e-11	1.71838e-09	a
G4P62_019465	1877.98	50.8962	8.87235e-12	7.39448e-10	a
G4P62_019574	230.837	37.5277	7.09503e-09	2.69705e-07	a
G4P62_019586	805.235	63.0548	2.0315e-14	3.3043e-12	a
G4P62_019591	2609.08	39.7833	2.29699e-09	1.02951e-07	a
G4P62_019656	5964.19	53.9953	1.88395e-12	1.86261e-10	a
G4P62_019676	315.528	47.7759	4.22283e-11	2.99895e-09	a
G4P62_019706	1814.62	39.4599	2.70014e-09	1.18648e-07	a
G4P62_019707	1176.52	39.0293	3.34887e-09	1.41898e-07	a
G4P62_019801	1285.82	66.9812	2.85251e-15	5.81135e-13	a
G4P62_019962	1817.58	43.5015	3.57908e-10	1.99962e-08	a
G4P62_019973	938.901	45.6347	1.23185e-10	7.81294e-09	a
G4P62_020051	4456.58	48.5611	2.85161e-11	2.09905e-09	a
G4P62_020059	2041.83	44.3953	2.28914e-10	1.34605e-08	a
G4P62_020115	3338.1	91.4072	1.41634e-20	1.14265e-17	a
G4P62_020132	2015.79	37.4753	7.28362e-09	2.751e-07	a
G4P62_000615	742.576	45.3873	1.39406e-10	8.78652e-09	b
G4P62_000902	66.0154	45.3058	1.452e-10	9.06666e-09	b
G4P62_001259	375.841	35.3576	2.09988e-08	7.11427e-07	b
G4P62_001506	2904.54	37.042	9.04546e-09	3.33525e-07	b
G4P62_001552	89.1695	47.5763	4.66598e-11	3.27903e-09	b
G4P62_001693	636.984	46.2482	9.06434e-11	6.01395e-09	b
G4P62_002601	1102.06	36.7491	1.04721e-08	3.81937e-07	b
G4P62_002635	963.641	44.8434	1.8297e-10	1.11349e-08	b
G4P62_002758	575.702	35.4772	1.97799e-08	6.73886e-07	b
G4P62_002879	694.3	58.5453	1.93663e-13	2.50383e-11	b
G4P62_003178	574.212	53.0189	3.06966e-12	2.86629e-10	b
G4P62_003214	3613.38	48.5632	2.84858e-11	2.09905e-09	b
G4P62_003284	256.13	59.9964	9.37452e-14	1.33151e-11	b
G4P62_003312	782.735	38.6079	4.13427e-09	1.70171e-07	b
G4P62_003322	1287.52	40.2821	1.79001e-09	8.29946e-08	b
G4P62_003356	641.86	40.1076	1.95324e-09	8.91287e-08	b
G4P62_003367	1706.27	43.2688	4.02071e-10	2.19172e-08	b
G4P62_003620	48.9019	47.1041	5.9086e-11	4.08119e-09	b
G4P62_003655	644.054	44.6355	2.03011e-10	1.21642e-08	b
G4P62_004107	1160.48	47.7126	4.35857e-11	3.08449e-09	b
G4P62_004828	1509.62	34.879	2.6676e-08	8.66389e-07	b
G4P62_004867	49.7899	38.8756	3.61627e-09	1.52268e-07	b
G4P62_005158	281.504	35.0184	2.48803e-08	8.19951e-07	b
G4P62_005409	303.583	42.3414	6.39257e-10	3.27238e-08	b
G4P62_005677	109.77	51.9186	5.32131e-12	4.70726e-10	b
G4P62_006268	128.476	72.8032	1.55234e-16	4.53756e-14	b
G4P62_006337	127.089	39.2071	3.06399e-09	1.32613e-07	b
G4P62_006476	827.767	67.9601	1.74846e-15	3.79189e-13	b
G4P62_006694	1708.27	50.5211	1.07023e-11	8.66886e-10	b
G4P62_006716	1213.45	39.6666	2.435e-09	1.08654e-07	b
G4P62_007137	1001.49	61.3945	4.65965e-14	6.98734e-12	b
G4P62_007537	329.36	44.0893	2.66772e-10	1.5417e-08	b
G4P62_007820	29.2607	42.7786	5.13747e-10	2.70542e-08	b
G4P62_008075	698.987	34.9312	2.59891e-08	8.53705e-07	b
G4P62_008318	598.233	50.2223	1.24272e-11	9.86512e-10	b
G4P62_008460	74.9031	39.4697	2.68697e-09	1.18326e-07	b
G4P62_008547	296.613	37.484	7.25189e-09	2.74415e-07	b
G4P62_008796	4241.76	37.3133	7.89793e-09	2.96084e-07	b
G4P62_008844	970.482	56.2456	6.1155e-13	6.74008e-11	b
G4P62_008940	795.167	37.1009	8.78293e-09	3.25033e-07	b
G4P62_009022	1022.42	41.5286	9.59777e-10	4.69848e-08	b
G4P62_009268	656.807	40.2019	1.86325e-09	8.5409e-08	b
G4P62_009396	722.183	46.8292	6.77897e-11	4.60354e-09	b
G4P62_009454	3677.72	35.9742	1.54277e-08	5.39275e-07	b
G4P62_009464	974.889	35.1784	2.29677e-08	7.64416e-07	b
G4P62_009475	467.361	46.8502	6.70808e-11	4.57079e-09	b
G4P62_009687	676.817	45.2917	1.46226e-10	9.08459e-09	b
G4P62_009791	544.398	61.3922	4.66504e-14	6.98734e-12	b
G4P62_010001	395.696	36.4542	1.21356e-08	4.37076e-07	b
G4P62_010049	90.3181	38.4821	4.40263e-09	1.79387e-07	b
G4P62_010284	275.929	38.2433	4.96103e-09	1.96967e-07	b
G4P62_010303	842.213	107.858	3.7919e-24	9.55986e-21	b
G4P62_010358	70.7183	35.2675	2.19665e-08	7.34282e-07	b
G4P62_010612	261.093	47.3762	5.15684e-11	3.58649e-09	b
G4P62_011093	941.129	59.413	1.25497e-13	1.68743e-11	b
G4P62_011144	1723.19	36.0362	1.49564e-08	5.25534e-07	b
G4P62_011193	444.847	35.8392	1.65048e-08	5.72953e-07	b
G4P62_011585	2528.68	35.3022	2.15887e-08	7.26916e-07	b
G4P62_011811	885.826	35.7984	1.68456e-08	5.83777e-07	b
G4P62_011883	51.2741	41.8193	8.29967e-10	4.14346e-08	b
G4P62_012008	1358.58	39.1908	3.08903e-09	1.33215e-07	b
G4P62_012409	200.681	40.9159	1.30383e-09	6.23152e-08	b
G4P62_012424	58.3653	42.618	5.5669e-10	2.90878e-08	b
G4P62_012812	1035.94	46.5038	7.97673e-11	5.38069e-09	b
G4P62_013242	192.381	35.7943	1.68801e-08	5.83971e-07	b
G4P62_013278	197.918	48.7084	2.64908e-11	1.97156e-09	b
G4P62_013322	200.587	56.5098	5.35862e-13	5.94452e-11	b
G4P62_013331	16.9629	36.8569	9.92274e-09	3.62558e-07	b
G4P62_013511	23.1941	46.0777	9.87107e-11	6.44427e-09	b
G4P62_013601	1862.27	43.5978	3.41086e-10	1.92161e-08	b
G4P62_013602	2304.02	66.344	3.92274e-15	7.68133e-13	b
G4P62_013645	212.557	44.5393	2.13018e-10	1.25993e-08	b
G4P62_013745	825.084	132.611	1.5992e-29	1.61271e-25	b
G4P62_013867	315.488	35.2834	2.1793e-08	7.3257e-07	b
G4P62_014003	3447.6	38.5394	4.27824e-09	1.75382e-07	b
G4P62_014038	62.3031	39.9896	2.07191e-09	9.36957e-08	b
G4P62_014128	515.466	41.8962	7.98662e-10	4.00702e-08	b
G4P62_014412	780.148	46.9238	6.46586e-11	4.42068e-09	b
G4P62_014505	743.14	61.1889	5.16415e-14	7.65851e-12	b
G4P62_014568	1071.91	38.0148	5.56162e-09	2.16549e-07	b
G4P62_014701	1054.77	37.7095	6.47867e-09	2.49367e-07	b
G4P62_014909	142.916	64.7166	8.85066e-15	1.55225e-12	b
G4P62_015238	608.716	62.9843	2.10442e-14	3.39552e-12	b
G4P62_015239	232.055	40.4227	1.6685e-09	7.81315e-08	b
G4P62_015256	570.917	44.28	2.42503e-10	1.4136e-08	b
G4P62_015285	209.069	44.7678	1.90017e-10	1.15089e-08	b
G4P62_015410	268.085	66.2494	4.11268e-15	7.89988e-13	b
G4P62_015620	977.14	37.7045	6.49482e-09	2.49512e-07	b
G4P62_016042	125.514	35.5945	1.86533e-08	6.38742e-07	b
G4P62_016236	1943.29	66.5023	3.62426e-15	7.23739e-13	b
G4P62_016358	1344.53	56.7804	4.68042e-13	5.30333e-11	b
G4P62_016439	787.925	37.6146	6.79339e-09	2.595e-07	b
G4P62_016664	1423.77	39.035	3.33932e-09	1.41791e-07	b
G4P62_016756	770.097	35.699	1.77033e-08	6.10356e-07	b
G4P62_016807	546.74	38.9323	3.51531e-09	1.48327e-07	b
G4P62_016847	140.352	46.0773	9.87297e-11	6.44427e-09	b
G4P62_017003	3149.84	51.1767	7.71102e-12	6.56217e-10	b
G4P62_017088	1086.03	61.8208	3.76523e-14	5.79702e-12	b
G4P62_017617	1484.58	34.7139	2.89722e-08	9.34943e-07	b
G4P62_017792	149.933	42.2345	6.74358e-10	3.43463e-08	b
G4P62_017945	612.53	34.937	2.59133e-08	8.52603e-07	b
G4P62_018218	1040.28	36.131	1.42646e-08	5.07337e-07	b
G4P62_018363	2696	39.6429	2.46412e-09	1.09469e-07	b
G4P62_018397	556.295	40.4213	1.66962e-09	7.81315e-08	b
G4P62_018478	676.823	37.213	8.30436e-09	3.08454e-07	b
G4P62_018629	331.566	48.4176	3.0638e-11	2.24705e-09	b
G4P62_018976	461.651	41.938	7.82116e-10	3.93379e-08	b
G4P62_019103	705.531	39.4156	2.76067e-09	1.20781e-07	b
G4P62_019121	1231.07	43.2698	4.01877e-10	2.19172e-08	b
G4P62_019207	827.427	41.2313	1.11364e-09	5.39927e-08	b
G4P62_019281	59.5866	39.0421	3.32749e-09	1.41587e-07	b
G4P62_019513	248.744	48.0651	3.65428e-11	2.62289e-09	b
G4P62_019718	187.65	53.3823	2.55966e-12	2.48201e-10	b
G4P62_019751	2857.88	41.7986	8.38576e-10	4.17611e-08	b
G4P62_019966	137.377	66.3544	3.90233e-15	7.68133e-13	b
G4P62_000488	310.746	35.9399	1.56945e-08	5.46706e-07	c
G4P62_003471	235.91	40.9707	1.26861e-09	6.07759e-08	c
G4P62_003829	801.496	49.5317	1.75519e-11	1.35116e-09	c
G4P62_003832	305.232	43.1658	4.23322e-10	2.27679e-08	c
G4P62_004531	130.913	81.8417	1.69159e-18	8.74815e-16	c
G4P62_004772	5886.1	38.6882	3.97153e-09	1.64666e-07	c
G4P62_004990	25.8531	50.8102	9.26208e-12	7.62477e-10	c
G4P62_005194	146.066	44.6323	2.0334e-10	1.21642e-08	c
G4P62_005225	104.536	52.402	4.17875e-12	3.76255e-10	c
G4P62_005773	257.325	76.5796	2.34942e-17	8.46169e-15	c
G4P62_006362	376.634	120.716	6.12216e-27	4.11593e-23	c
G4P62_006458	427.684	45.8971	1.08034e-10	6.96148e-09	c
G4P62_008900	760.317	42.3839	6.25824e-10	3.2282e-08	c
G4P62_010307	130.998	56.5077	5.36418e-13	5.94452e-11	c
G4P62_010978	36.5574	118.933	1.49267e-26	6.02114e-23	c
G4P62_011989	556.16	42.2986	6.53088e-10	3.33472e-08	c
G4P62_012275	881.461	40.3753	1.7085e-09	7.95814e-08	c
G4P62_012401	362.812	43.865	2.98427e-10	1.69549e-08	c
G4P62_012550	153.019	63.4221	1.69069e-14	2.80688e-12	c
G4P62_012824	76.8811	51.7627	5.75285e-12	5.04475e-10	c
G4P62_013402	204.773	70.0028	6.29639e-16	1.53002e-13	c
G4P62_014912	3164.42	36.038	1.49434e-08	5.25534e-07	c
G4P62_016546	35.3303	42.6581	5.45659e-10	2.85854e-08	c
G4P62_011197	136.898	37.8086	6.16552e-09	2.38223e-07	d
G4P62_015756	19.0324	34.5828	3.09347e-08	9.93506e-07	d
G4P62_000001	150.478	17.2295	0.000181414	0.00170104	NA
G4P62_000002	96.1613	9.12865	0.0104169	0.0441154	NA
G4P62_000003	241.411	0.976999	0.613546	0.734469	NA
G4P62_000004	65.0612	1.76897	0.412927	0.566292	NA
G4P62_000005	663.125	1.3525	0.50852	0.650036	NA
G4P62_000006	266.933	18.5599	9.3277e-05	0.000973917	NA
G4P62_000007	2780.4	0.0327269	0.98377	0.989362	NA
G4P62_000008	32.0434	3.44821	0.178332	0.324796	NA
G4P62_000009	27.3556	8.861	0.0119085	0.0488494	NA
G4P62_000010	1106	1.19754	0.549487	0.684353	NA
G4P62_000011	16.1061	2.12381	0.345797	0.505153	NA
G4P62_000012	619.442	1.03169	0.596996	0.722243	NA
G4P62_000013	726.161	4.32821	0.114853	0.240672	NA
G4P62_000014	18.362	0.270595	0.873456	0.919646	NA
G4P62_000015	12.8274	5.70425	0.0577216	0.151056	NA
G4P62_000016	60.3574	6.99053	0.0303407	0.0957634	NA
G4P62_000017	1022.07	4.15403	0.125304	0.256028	NA
G4P62_000018	5305.49	6.47734	0.039216	0.115013	NA
G4P62_000019	566.991	1.25655	0.533511	0.670637	NA
G4P62_000020	27.2409	0.66014	0.718873	0.812801	NA
G4P62_000021	1686.95	3.96021	0.138055	0.27317	NA
G4P62_000022	22.8376	2.08626	0.35235	0.511336	NA
G4P62_000023	7.04147	0.314188	0.854624	0.907646	NA
G4P62_000024	125.963	0.98773	0.610263	0.732253	NA
G4P62_000025	10.5324	1.75839	0.415117	0.568358	NA
G4P62_000026	16.9936	0.934584	0.626697	0.744396	NA
G4P62_000027	33.8106	6.72738	0.0346073	0.105231	NA
G4P62_000028	382.633	2.36488	0.30653	0.465759	NA
G4P62_000029	1716.15	14.9407	0.000569736	0.00433951	NA
G4P62_000030	7695	0.738447	0.691271	0.793616	NA
G4P62_000031	61.5076	1.17701	0.555156	0.68902	NA
G4P62_000032	24.7862	5.38174	0.0678219	0.168668	NA
G4P62_000033	53.8562	0.913875	0.63322	0.749364	NA
G4P62_000034	1996.61	5.41917	0.0665644	0.166671	NA
G4P62_000035	29.6418	2.14007	0.342996	0.502366	NA
G4P62_000036	351.743	0.598322	0.74144	0.828739	NA
G4P62_000037	15.7757	0.505092	0.776821	0.854838	NA
G4P62_000038	400.719	34.3064	3.55198e-08	1.12464e-06	NA
G4P62_000040	10.0494	5.01125	0.0816245	0.190807	NA
G4P62_000041	4.92123	0.0412996	0.979562	NA	NA
G4P62_000042	468.808	2.86475	0.238741	0.394068	NA
G4P62_000043	13099.5	1.8016	0.406244	0.560436	NA
G4P62_000044	1366.96	17.8242	0.000134751	0.0013277	NA
G4P62_000045	2300.04	11.0349	0.00401615	0.0212046	NA
G4P62_000046	864.438	4.32035	0.115305	0.241143	NA
G4P62_000047	4509.3	25.829	2.46213e-06	4.48993e-05	NA
G4P62_000049	95.3885	1.29932	0.522223	0.661105	NA
G4P62_000050	123.761	24.0114	6.10926e-06	9.61137e-05	NA
G4P62_000051	430.635	0.320651	0.851866	0.90633	NA
G4P62_000052	871.729	1.09829	0.577442	0.708076	NA
G4P62_000053	1431.97	8.95281	0.0113742	0.0472361	NA
G4P62_000054	3638.04	8.26097	0.0160751	0.0605562	NA
G4P62_000056	1203.24	5.54143	0.0626172	0.159449	NA
G4P62_000057	657.779	7.92438	0.0190214	0.0686058	NA
G4P62_000058	612.631	0.413344	0.813286	0.880646	NA
G4P62_000059	39.0367	0.300512	0.860488	0.911176	NA
G4P62_000060	2373.83	2.2239	0.328918	0.488394	NA
G4P62_000061	3934.08	22.1765	1.52906e-05	0.000210942	NA
G4P62_000062	464.55	1.69676	0.428107	0.578952	NA
G4P62_000063	108.654	6.77616	0.0337734	0.103536	NA
G4P62_000064	361.234	8.39103	0.0150629	0.0577465	NA
G4P62_000065	75.6181	1.29682	0.522877	0.661683	NA
G4P62_000067	3634.31	11.575	0.00306566	0.0172429	NA
G4P62_000068	172.483	7.75908	0.0206603	0.0726968	NA
G4P62_000069	112.407	9.73107	0.0077077	0.0351368	NA
G4P62_000070	21.2222	2.26762	0.321805	0.481259	NA
G4P62_000071	11.956	3.04152	0.218546	0.372473	NA
G4P62_000072	0.848859	0.682892	0.710742	NA	NA
G4P62_000073	234.923	18.0913	0.000117904	0.0011861	NA
G4P62_000074	1180.41	0.0803359	0.960628	0.974348	NA
G4P62_000075	5544.47	19.1191	7.05243e-05	0.000772626	NA
G4P62_000076	3074.7	2.48396	0.288811	0.448045	NA
G4P62_000077	462.724	13.9514	0.000934295	0.00655664	NA
G4P62_000078	3853.68	8.70213	0.0128931	0.0516364	NA
G4P62_000079	851.615	0.114054	0.944569	0.964413	NA
G4P62_000080	294.332	21.9167	1.74118e-05	0.000234589	NA
G4P62_000081	459.579	4.21579	0.121494	0.250467	NA
G4P62_000082	480.861	6.05469	0.0484441	0.132989	NA
G4P62_000083	1805.51	8.5664	0.0137984	0.0541651	NA
G4P62_000084	806.145	0.245795	0.884354	0.926814	NA
G4P62_000085	5.92275	0.761182	0.683457	0.787649	NA
G4P62_000086	58.9517	1.4954	0.473455	0.619751	NA
G4P62_000087	176.34	0.98696	0.610498	0.732367	NA
G4P62_000088	606.349	10.0728	0.00649714	0.0307752	NA
G4P62_000089	887.401	14.79	0.000614317	0.00461115	NA
G4P62_000090	62.8094	3.025	0.220358	0.374486	NA
G4P62_000091	238.9	5.94382	0.0512053	0.138273	NA
G4P62_000092	2402.25	1.84693	0.397141	0.552136	NA
G4P62_000093	1.78266	1.04896	0.591864	NA	NA
G4P62_000094	267.793	1.49618	0.473269	0.619648	NA
G4P62_000095	924.375	3.13139	0.208943	0.360957	NA
G4P62_000096	3360.65	23.006	1.00997e-05	0.000148254	NA
G4P62_000097	3954.64	26.0863	2.16484e-06	4.00943e-05	NA
G4P62_000098	685.241	0.868989	0.647592	0.760128	NA
G4P62_000100	11.3831	1.95053	0.377092	0.533468	NA
G4P62_000101	1.62973	1.46063	0.481758	NA	NA
G4P62_000103	739.921	10.609	0.00496923	0.0250022	NA
G4P62_000104	1432.25	0.167595	0.919618	0.948692	NA
G4P62_000105	427.865	2.78453	0.248512	0.404764	NA
G4P62_000106	1206.47	3.73937	0.154173	0.294652	NA
G4P62_000107	90.5562	4.94695	0.0842916	0.19512	NA
G4P62_000108	35.7158	1.17224	0.556483	0.69003	NA
G4P62_000109	15.3761	5.40392	0.0670739	0.167506	NA
G4P62_000110	847.366	9.88027	0.00715364	0.0331378	NA
G4P62_000111	1443.34	14.4184	0.000739752	0.00538824	NA
G4P62_000112	5.29018	0.404826	0.816758	NA	NA
G4P62_000113	27.1	0.0894819	0.956245	0.971564	NA
G4P62_000114	16.4872	0.338124	0.844457	0.90149	NA
G4P62_000115	402.87	10.3295	0.00571449	0.0279137	NA
G4P62_000116	1875.56	18.7924	8.30398e-05	0.000884282	NA
G4P62_000117	4069	19.2881	6.48092e-05	0.000718207	NA
G4P62_000118	65.2397	2.5116	0.284848	0.443568	NA
G4P62_000119	10.3989	0.689389	0.708437	0.805574	NA
G4P62_000120	4110.29	0.244819	0.884786	0.927128	NA
G4P62_000121	198.973	3.27274	0.194685	0.344439	NA
G4P62_000122	151.746	2.15512	0.340426	0.500332	NA
G4P62_000123	1082.44	11.5552	0.00309618	0.0173615	NA
G4P62_000124	1166.28	15.977	0.000339339	0.00284107	NA
G4P62_000125	1812.7	5.46017	0.0652139	0.16431	NA
G4P62_000126	143.087	11.8415	0.00268323	0.0155825	NA
G4P62_000127	503.003	9.83063	0.00733341	0.0337766	NA
G4P62_000128	3.43468	0.561742	0.755126	NA	NA
G4P62_000129	485.531	3.68726	0.158242	0.29951	NA
G4P62_000130	8.27799	15.1922	0.000502408	0.00391083	NA
G4P62_000131	19.3356	6.93686	0.0311659	0.0976079	NA
G4P62_000132	504.376	0.290872	0.864645	0.913852	NA
G4P62_000133	151.173	6.17798	0.045548	0.127432	NA
G4P62_000134	77.9389	8.81162	0.0122062	0.0497046	NA
G4P62_000135	564.328	5.27885	0.0714025	0.174661	NA
G4P62_000136	4691.75	9.17174	0.0101949	0.04349	NA
G4P62_000137	6.28865	4.97838	0.0829773	0.193048	NA
G4P62_000138	26.3651	1.70358	0.426651	0.57799	NA
G4P62_000139	191.503	7.65118	0.0218055	0.0755274	NA
G4P62_000140	1070.29	6.50202	0.038735	0.114017	NA
G4P62_000141	301.72	0.593493	0.743232	0.830032	NA
G4P62_000142	23.1335	1.8385	0.398817	0.553711	NA
G4P62_000143	85.1569	4.35113	0.113544	0.238814	NA
G4P62_000144	95.7677	1.49078	0.47455	0.62073	NA
G4P62_000147	678.571	5.66099	0.0589837	0.153206	NA
G4P62_000148	2056.51	0.265378	0.875737	0.921243	NA
G4P62_000149	3540.16	5.92626	0.0516569	0.139109	NA
G4P62_000150	1322.19	6.90551	0.0316583	0.0986734	NA
G4P62_000151	305.116	12.6746	0.00176904	0.0110738	NA
G4P62_000152	298.897	0.048517	0.976033	0.984328	NA
G4P62_000153	12.5109	1.20726	0.546824	0.682059	NA
G4P62_000154	1.68371	0.539687	0.763499	NA	NA
G4P62_000155	28.7832	4.59078	0.100722	0.220475	NA
G4P62_000156	3571.15	2.42172	0.297941	0.457319	NA
G4P62_000157	170.138	0.226321	0.893007	0.932057	NA
G4P62_000158	1729.81	0.665513	0.716945	0.811861	NA
G4P62_000159	217.258	3.65534	0.160788	0.303118	NA
G4P62_000160	475.397	0.44912	0.798868	0.869925	NA
G4P62_000161	1.17824	0.090435	0.95579	NA	NA
G4P62_000162	2761.95	15.8072	0.000369416	0.0030436	NA
G4P62_000163	64.7762	5.30037	0.0706382	0.173343	NA
G4P62_000164	438.232	7.37648	0.025016	0.0833411	NA
G4P62_000165	566.239	3.01819	0.22111	0.375479	NA
G4P62_000166	157.322	12.2473	0.00219042	0.0131523	NA
G4P62_000167	48.5626	4.56075	0.102246	0.222627	NA
G4P62_000168	11.1731	1.36833	0.504511	0.646268	NA
G4P62_000169	56.0806	3.00222	0.222883	0.377315	NA
G4P62_000170	649.274	0.881385	0.643591	0.756973	NA
G4P62_000171	517.945	5.37331	NA	NA	NA
G4P62_000172	12.4155	1.33746	0.512358	0.653415	NA
G4P62_000173	1236.07	4.69946	0.0953949	0.212458	NA
G4P62_000174	302.742	2.01032	0.365986	0.523246	NA
G4P62_000175	137.683	0.32925	0.848212	0.904063	NA
G4P62_000176	347.939	4.42081	0.109656	0.233224	NA
G4P62_000177	6310.52	22.1235	1.57017e-05	0.000215141	NA
G4P62_000178	4551.2	6.76493	0.0339636	0.103931	NA
G4P62_000179	30.241	0.817015	0.664642	0.772993	NA
G4P62_000180	2995.86	29.3393	4.25653e-07	9.90195e-06	NA
G4P62_000181	78.8911	5.51891	0.0633264	0.160773	NA
G4P62_000182	2262.43	0.157911	0.924081	0.951442	NA
G4P62_000183	1146.21	9.21869	0.00995836	0.0426796	NA
G4P62_000184	323.898	17.6923	0.000143933	0.0014058	NA
G4P62_000185	4728.94	2.04292	0.36007	0.51814	NA
G4P62_000186	10.2926	3.45435	0.177786	0.324268	NA
G4P62_000187	38.1059	2.20426	NA	NA	NA
G4P62_000188	308.482	0.116887	0.943232	0.96363	NA
G4P62_000189	2245.18	0.488205	0.783407	0.859099	NA
G4P62_000190	99.0904	8.57532	0.013737	0.0539766	NA
G4P62_000191	855.84	18.3543	0.000103374	0.00106158	NA
G4P62_000192	1744.62	13.7695	0.00102329	0.00705595	NA
G4P62_000193	326.542	1.76283	0.414197	0.567331	NA
G4P62_000194	1.08174	0.177094	0.91526	NA	NA
G4P62_000195	11610.6	1.24161	0.537512	0.673893	NA
G4P62_000196	11505.1	16.6532	0.000241989	0.00216438	NA
G4P62_000197	53.8172	4.26959	0.118269	0.245619	NA
G4P62_000198	3.89825	1.31047	0.51932	NA	NA
G4P62_000199	3536.94	0.258688	0.878671	0.923402	NA
G4P62_000200	35.6131	6.37907	0.041191	0.118819	NA
G4P62_000201	2886.24	1.50785	0.470516	0.617525	NA
G4P62_000202	166.021	4.84321	0.0887792	0.2023	NA
G4P62_000203	5600.09	21.5404	2.10165e-05	0.00027418	NA
G4P62_000204	1420.35	12.3687	0.00206144	0.0125119	NA
G4P62_000205	9.60854	1.49055	0.474604	0.62073	NA
G4P62_000206	57.306	0.334614	0.84594	0.902496	NA
G4P62_000207	31.7877	2.39094	0.302561	0.462335	NA
G4P62_000208	8468.01	16.3344	0.000283809	0.0024652	NA
G4P62_000209	729.805	7.15273	0.0279772	0.0903397	NA
G4P62_000210	8.41921	2.86425	0.238801	0.394074	NA
G4P62_000211	36.652	7.68493	0.0214407	0.0747129	NA
G4P62_000212	38.3817	7.81334	0.0201074	0.071336	NA
G4P62_000213	34.0959	6.81359	0.0331472	0.102037	NA
G4P62_000214	2956.92	6.55068	0.0378041	0.112178	NA
G4P62_000215	125.74	1.38295	0.500838	0.643357	NA
G4P62_000217	28.6743	2.52082	0.283538	0.44204	NA
G4P62_000218	3161.02	1.31545	0.518029	0.658209	NA
G4P62_000219	920.56	28.0144	8.25575e-07	1.7509e-05	NA
G4P62_000220	4690.62	0.894811	0.639285	0.753799	NA
G4P62_000221	171.306	27.0469	1.33922e-06	2.66115e-05	NA
G4P62_000222	17567.7	2.28288	0.319359	0.478542	NA
G4P62_000224	1776.8	12.9899	0.00151103	0.00972738	NA
G4P62_000225	9478.62	24.0167	6.09297e-06	9.60071e-05	NA
G4P62_000226	6056.58	19.6363	5.44544e-05	0.000618755	NA
G4P62_000227	2542.45	2.6378	0.26743	0.424909	NA
G4P62_000228	19.1526	0.135357	0.934561	0.957352	NA
G4P62_000229	1712.67	31.2665	1.62395e-07	4.28709e-06	NA
G4P62_000230	1737.16	6.5903	0.0370624	0.110533	NA
G4P62_000231	293.989	2.45021	0.293727	0.4533	NA
G4P62_000232	2884.16	6.91634	0.0314873	0.0983381	NA
G4P62_000233	39.6917	2.96003	NA	NA	NA
G4P62_000234	17.2577	21.569	2.07178e-05	0.000271488	NA
G4P62_000235	1132.53	3.12913	0.209179	0.361165	NA
G4P62_000236	1034.78	0.454238	0.796826	0.868431	NA
G4P62_000237	1.61886	2.4714	0.290631	NA	NA
G4P62_000238	1007.89	1.9562	0.376024	0.532512	NA
G4P62_000239	331.102	8.65129	0.013225	0.0525173	NA
G4P62_000240	46.1441	0.446453	0.799934	0.870528	NA
G4P62_000241	820.522	4.90905	0.0859038	0.197601	NA
G4P62_000242	3012.36	4.81641	0.0899767	0.203972	NA
G4P62_000243	584.834	1.46741	0.480128	0.625239	NA
G4P62_000244	1403.47	14.8846	0.000585948	0.00443784	NA
G4P62_000245	38.971	4.59993	0.100263	0.219756	NA
G4P62_000247	169.722	6.17722	0.0455653	0.127463	NA
G4P62_000248	4.25051	5.2764	NA	NA	NA
G4P62_000249	390.365	18.37	0.000102567	0.0010549	NA
G4P62_000250	427.26	4.78994	0.0911756	0.205926	NA
G4P62_000251	514.001	0.95564	0.620134	0.739506	NA
G4P62_000252	256.581	2.91339	0.233005	0.387969	NA
G4P62_000253	24.7101	0.923261	0.630255	0.746885	NA
G4P62_000254	6049.49	1.72441	0.422231	0.57407	NA
G4P62_000255	1511.49	0.833103	0.659317	0.769323	NA
G4P62_000256	42.5166	2.91952	0.232292	0.38723	NA
G4P62_000257	1.74373	0.899716	0.637719	NA	NA
G4P62_000258	38.5617	2.42661	0.297214	0.456585	NA
G4P62_000261	8882.32	4.88498	0.0869441	0.199241	NA
G4P62_000262	2784.66	25.1984	3.37465e-06	5.86247e-05	NA
G4P62_000263	77.9117	0.734306	0.692704	0.79462	NA
G4P62_000264	7.48577	1.75761	0.415279	0.568465	NA
G4P62_000265	151.55	6.34912	NA	NA	NA
G4P62_000266	1872.4	2.11817	0.346773	0.506046	NA
G4P62_000267	44.1496	6.16929	0.0457462	0.127845	NA
G4P62_000268	646.559	2.57945	0.275346	0.433423	NA
G4P62_000269	13.6611	5.5069	0.0637078	0.161504	NA
G4P62_000270	862.318	2.57167	0.27642	0.434374	NA
G4P62_000271	311.392	7.11468	0.0285145	0.091607	NA
G4P62_000272	54.769	6.58965	0.0370746	0.110533	NA
G4P62_000273	2354.8	8.68905	0.0129777	0.051831	NA
G4P62_000274	1590	4.43484	NA	NA	NA
G4P62_000275	933.01	4.49762	0.105525	0.227557	NA
G4P62_000276	507.446	4.77137	0.0920261	0.207285	NA
G4P62_000277	1860.59	34.5156	3.19918e-08	1.02419e-06	NA
G4P62_000278	110.664	1.77114	0.412479	0.566083	NA
G4P62_000279	283.157	1.89275	0.388146	0.544024	NA
G4P62_000280	93.114	9.57808	0.00832045	0.0372613	NA
G4P62_000281	426.239	3.62575	0.163184	0.305904	NA
G4P62_000282	1062.57	4.11829	0.127563	0.259147	NA
G4P62_000283	100.348	6.29867	0.0428807	0.122035	NA
G4P62_000284	5.39877	0.417357	0.811656	NA	NA
G4P62_000285	2198.09	26.993	1.37578e-06	2.71242e-05	NA
G4P62_000286	166.869	2.34791	0.309142	0.4681	NA
G4P62_000287	867.985	2.53351	0.281745	0.440169	NA
G4P62_000288	2292.98	5.95509	0.0509178	0.137829	NA
G4P62_000289	44.1294	5.21914	0.0735662	0.178242	NA
G4P62_000290	93.7277	14.8994	0.00058161	0.00440664	NA
G4P62_000291	235.146	6.00774	0.0495948	0.135355	NA
G4P62_000292	4284.41	27.1119	1.29637e-06	2.58846e-05	NA
G4P62_000293	1082.86	7.67535	0.0215437	0.0749546	NA
G4P62_000294	129.104	9.7533	0.00762251	0.0348376	NA
G4P62_000295	69.2176	1.56152	0.458058	0.606723	NA
G4P62_000296	1.37972	3.64989	0.161227	NA	NA
G4P62_000297	1.05481	2.34307	0.30989	NA	NA
G4P62_000298	0.920257	2.0852	0.352537	NA	NA
G4P62_000299	0.920257	2.0852	0.352537	NA	NA
G4P62_000300	11.9167	4.66294	0.0971527	0.215232	NA
G4P62_000301	281.936	4.33838	0.11427	0.2399	NA
G4P62_000306	1.8668	0.231389	0.890747	NA	NA
G4P62_000310	1132.81	10.5508	0.00511592	0.025591	NA
G4P62_000311	6.53106	1.42263	0.490997	0.634762	NA
G4P62_000313	2.50004	0.106639	0.948077	NA	NA
G4P62_000314	31.1772	2.46156	0.292065	0.451528	NA
G4P62_000315	5.73263	1.04591	0.592767	NA	NA
G4P62_000316	19.7622	0.0187298	0.990679	0.993808	NA
G4P62_000317	9.06501	0.310666	0.85613	0.908518	NA
G4P62_000318	9.38039	1.98303	0.371014	0.528236	NA
G4P62_000319	215.12	8.27481	0.0159642	0.0602737	NA
G4P62_000320	1.05098	1.88421	0.389806	NA	NA
G4P62_000321	1.03377	3.4313	0.179846	NA	NA
G4P62_000322	40.1049	12.835	0.00163277	0.0103669	NA
G4P62_000323	457.966	12.4925	0.00193767	0.0119185	NA
G4P62_000324	354.367	1.92759	0.381443	0.537732	NA
G4P62_000325	34.4481	2.10114	0.349738	0.508754	NA
G4P62_000326	121.364	2.00825	0.366366	0.523576	NA
G4P62_000327	1222.57	6.20991	0.0448265	0.12606	NA
G4P62_000328	7.09499	0.205139	0.902516	0.938	NA
G4P62_000329	543.26	4.9484	0.0842304	0.195055	NA
G4P62_000330	2817.99	4.64645	0.0979573	0.21632	NA
G4P62_000331	381.737	0.405903	0.816318	0.882909	NA
G4P62_000332	16433.5	28.0947	7.9306e-07	1.69262e-05	NA
G4P62_000333	840.779	1.90843	0.385115	0.541244	NA
G4P62_000334	173.355	2.18294	0.335722	0.495393	NA
G4P62_000335	925.558	9.95971	0.00687505	0.0321128	NA
G4P62_000336	27.0343	1.73241	0.420545	0.573222	NA
G4P62_000337	3.9817	1.21402	0.544978	NA	NA
G4P62_000338	6265.88	3.11626	0.210529	0.362679	NA
G4P62_000339	114.584	0.455819	0.796196	0.867982	NA
G4P62_000340	7139.16	16.0265	0.000331045	0.00279016	NA
G4P62_000341	2270.45	24.9374	3.84521e-06	6.54133e-05	NA
G4P62_000342	343.253	3.03799	0.218932	0.372911	NA
G4P62_000343	223.916	6.01056	0.0495248	0.135238	NA
G4P62_000344	1277.82	2.19201	0.334203	0.493958	NA
G4P62_000345	1635.97	18.9158	7.80715e-05	0.000842044	NA
G4P62_000346	8.18399	0.190555	0.909121	0.941953	NA
G4P62_000347	2570.6	14.3804	0.00075394	0.00546593	NA
G4P62_000348	29.1947	10.2465	0.00595661	0.0287965	NA
G4P62_000349	101.966	3.95208	0.138617	0.274014	NA
G4P62_000350	3.85333	0.68365	0.710473	NA	NA
G4P62_000351	409.751	5.81429	0.0546315	0.144925	NA
G4P62_000352	2188.87	18.3673	0.000102703	0.00105546	NA
G4P62_000353	1115.65	0.196445	0.906447	0.940436	NA
G4P62_000354	6.71114	2.3012	0.316446	0.475341	NA
G4P62_000355	21.9436	3.5128	0.172665	0.317977	NA
G4P62_000356	46.9827	5.58388	0.0613021	0.157351	NA
G4P62_000357	149.975	1.05385	0.590416	0.717702	NA
G4P62_000358	801.995	11.3812	0.00337763	0.0185099	NA
G4P62_000359	319.287	1.55264	0.460095	0.608582	NA
G4P62_000360	454.648	7.17638	0.0276483	0.0895804	NA
G4P62_000361	4.0769	1.10188	0.576406	NA	NA
G4P62_000362	12.4999	5.25382	0.0723016	0.176181	NA
G4P62_000363	4.5322	1.30948	0.519577	NA	NA
G4P62_000364	1.28283	1.80376	0.405805	NA	NA
G4P62_000366	44.7251	0.54926	0.759853	0.841874	NA
G4P62_000367	252.3	0.0656895	0.967689	0.979097	NA
G4P62_000368	475.28	1.51689	0.468393	0.615602	NA
G4P62_000369	16597.3	5.86922	0.0531513	0.142044	NA
G4P62_000370	4.30087	3.03346	0.219429	NA	NA
G4P62_000371	91.5557	3.73022	0.154879	0.29528	NA
G4P62_000372	38.511	3.88735	0.143177	0.280227	NA
G4P62_000373	1061.72	3.99266	0.135833	0.270312	NA
G4P62_000374	176.96	5.24154	0.0727469	0.177031	NA
G4P62_000375	9.65228	3.96319	0.137849	0.272897	NA
G4P62_000376	98.2171	1.80525	0.405504	0.559872	NA
G4P62_000377	13.4907	3.77799	0.151224	0.291117	NA
G4P62_000378	233.566	21.4593	2.18859e-05	0.000283869	NA
G4P62_000379	255.778	8.60492	0.0135352	0.0534649	NA
G4P62_000380	96.8354	7.68753	0.0214128	0.074693	NA
G4P62_000381	3.27944	1.14485	0.564156	NA	NA
G4P62_000382	99.8601	1.17555	0.555561	0.689288	NA
G4P62_000383	833.194	1.37595	0.502594	0.644795	NA
G4P62_000384	94.7739	7.74297	0.0208274	0.0731865	NA
G4P62_000385	416.882	0.320804	0.851801	0.906308	NA
G4P62_000386	4407.3	24.7055	4.31785e-06	7.16763e-05	NA
G4P62_000387	130.499	4.07939	0.130068	0.26244	NA
G4P62_000388	1926.55	28.0854	7.96777e-07	1.69696e-05	NA
G4P62_000390	172.217	11.4263	0.00330231	0.0181879	NA
G4P62_000391	27.3693	0.727619	0.695024	0.795886	NA
G4P62_000392	3815.97	4.34023	0.114164	0.239802	NA
G4P62_000393	983.215	2.34915	0.308951	0.467969	NA
G4P62_000394	752.116	14.3141	0.000779346	0.00560779	NA
G4P62_000395	1423.32	33.2423	6.04683e-08	1.77265e-06	NA
G4P62_000396	382.703	8.80413	0.012252	0.0498026	NA
G4P62_000397	29.9023	1.70389	0.426584	0.577945	NA
G4P62_000398	753.988	1.72669	0.421749	0.573862	NA
G4P62_000399	10.3253	0.512497	0.773949	0.852807	NA
G4P62_000400	23.0473	8.78292	0.0123826	0.0502101	NA
G4P62_000401	226.858	4.7229	0.0942832	0.210887	NA
G4P62_000402	12.1372	3.85475	0.14553	0.28373	NA
G4P62_000403	59.7125	5.37878	0.0679225	0.168794	NA
G4P62_000404	264.54	2.07727	0.353938	0.51246	NA
G4P62_000405	122.849	2.34515	0.309569	0.468499	NA
G4P62_000406	103.469	1.0334	0.596485	0.722018	NA
G4P62_000407	391.985	3.55933	0.168694	0.313192	NA
G4P62_000408	87.4364	7.08087	0.0290007	0.0927074	NA
G4P62_000409	3.30765	0.982762	0.611781	NA	NA
G4P62_000410	4332.43	7.59116	0.0224699	0.0771003	NA
G4P62_000411	907.293	26.6449	1.63733e-06	3.14209e-05	NA
G4P62_000412	705.1	0.960203	0.618721	0.738321	NA
G4P62_000413	39.7357	9.92527	0.00699448	0.0325527	NA
G4P62_000414	157.573	15.0095	0.000550455	0.00421814	NA
G4P62_000415	1726.73	8.1868	0.0166824	0.062299	NA
G4P62_000416	5.73847	0.531748	0.766536	NA	NA
G4P62_000417	4107.82	5.33591	0.0693939	0.171205	NA
G4P62_000418	618.413	3.18333	0.203586	0.355601	NA
G4P62_000419	758.359	9.79573	0.00746249	0.0342226	NA
G4P62_000420	419.42	1.30321	0.521208	0.660442	NA
G4P62_000421	251.984	0.517291	0.772097	0.851836	NA
G4P62_000422	161.453	0.0619337	0.969508	0.980249	NA
G4P62_000423	196.347	5.1962	0.0744147	0.179588	NA
G4P62_000424	11383.7	0.0986352	0.951879	0.969031	NA
G4P62_000425	555.929	2.41458	0.299006	0.458395	NA
G4P62_000426	104.53	20.5496	3.44921e-05	0.00041782	NA
G4P62_000427	61.0859	30.7767	2.0746e-07	5.27651e-06	NA
G4P62_000428	248.777	11.4349	0.00328802	0.0181241	NA
G4P62_000429	667.504	4.69155	0.0957731	0.213135	NA
G4P62_000430	1281.01	5.05522	0.0798496	0.188273	NA
G4P62_000431	971.482	2.07416	0.354489	0.512991	NA
G4P62_000432	1021.33	2.0117	0.365733	0.523042	NA
G4P62_000434	1025.82	4.3598	0.113053	0.238187	NA
G4P62_000435	6127.43	4.40593	0.110475	0.234493	NA
G4P62_000437	379.87	3.72104	0.155592	0.296106	NA
G4P62_000438	9.22393	1.41972	0.491713	0.635239	NA
G4P62_000439	41.862	3.15433	0.20656	0.358345	NA
G4P62_000440	1670.65	1.77348	0.411997	0.565853	NA
G4P62_000441	9.57567	3.02712	0.220125	0.374286	NA
G4P62_000442	524.449	8.76291	0.0125072	0.050512	NA
G4P62_000443	553.914	1.52081	0.467478	0.614799	NA
G4P62_000444	1550.07	22.3235	1.42073e-05	0.000198714	NA
G4P62_000445	2109.25	0.700982	0.704342	0.802637	NA
G4P62_000446	2664.33	3.52152	0.171914	0.317203	NA
G4P62_000447	34.0302	5.31319	0.0701868	0.172655	NA
G4P62_000448	147.575	5.68029	0.0584173	0.152362	NA
G4P62_000449	155.951	2.67699	0.26224	0.419206	NA
G4P62_000450	566.9	2.54865	0.27962	0.43778	NA
G4P62_000451	990.175	3.99132	0.135924	0.270383	NA
G4P62_000452	7.6013	0.900442	0.637487	0.75256	NA
G4P62_000453	23.0015	1.0749	0.584237	0.713069	NA
G4P62_000454	5577.64	12.3446	0.00208639	0.0126367	NA
G4P62_000455	2327.52	1.08253	0.582011	0.711299	NA
G4P62_000456	492.214	4.58859	0.100832	0.220592	NA
G4P62_000457	1883.6	14.1069	0.000864402	0.00613878	NA
G4P62_000458	513.844	16.6815	0.000238588	0.00213966	NA
G4P62_000459	16122.7	7.35794	0.0252489	0.083953	NA
G4P62_000460	869.785	3.89224	0.142827	0.279767	NA
G4P62_000461	1.64138	0.187172	0.91066	NA	NA
G4P62_000462	144.744	9.43	0.00895987	0.0394395	NA
G4P62_000463	85.1941	3.99095	0.135949	0.270383	NA
G4P62_000464	103.423	1.22475	0.542061	0.677379	NA
G4P62_000465	705.506	2.70631	0.258423	0.415508	NA
G4P62_000466	395.233	4.29727	0.116643	0.243135	NA
G4P62_000467	5198.28	1.38815	0.499536	0.642157	NA
G4P62_000468	1182.19	7.12677	0.0283427	0.0911714	NA
G4P62_000469	1430.27	2.51341	0.28459	0.443324	NA
G4P62_000470	444.615	8.64368	0.0132755	0.0526554	NA
G4P62_000471	4305.86	9.06312	0.0107639	0.0451908	NA
G4P62_000472	1371.71	1.91411	0.384022	0.540484	NA
G4P62_000473	571.163	28.4088	6.77819e-07	1.46527e-05	NA
G4P62_000474	895.82	6.50681	0.0386425	0.113878	NA
G4P62_000475	54.0237	0.17997	0.913945	0.944961	NA
G4P62_000476	148.142	5.54065	0.0626415	0.159449	NA
G4P62_000477	2128.47	25.9118	2.3623e-06	4.31568e-05	NA
G4P62_000478	298.607	2.81244	NA	NA	NA
G4P62_000479	1.83451	0.0981595	0.952105	NA	NA
G4P62_000480	796.647	0.477019	0.787801	0.862417	NA
G4P62_000481	1.35507	2.03569	0.361373	NA	NA
G4P62_000482	894.352	5.59157	0.061067	0.157039	NA
G4P62_000483	1961.35	0.645264	0.72424	0.816437	NA
G4P62_000484	347.799	6.00699	0.0496135	0.13537	NA
G4P62_000485	235.121	4.69558	0.0955803	0.212824	NA
G4P62_000486	3186.41	29.0874	4.82789e-07	1.09779e-05	NA
G4P62_000487	25.0981	8.26528	0.0160405	0.0605052	NA
G4P62_000489	6024.39	0.224	0.894044	0.932628	NA
G4P62_000490	2573.87	4.54836	0.102881	0.223625	NA
G4P62_000491	1459.15	3.73507	0.154504	0.294898	NA
G4P62_000492	379.107	2.99871	0.223274	0.377691	NA
G4P62_000493	314.107	4.76349	0.0923894	0.207877	NA
G4P62_000494	188.613	2.5609	0.277913	0.436058	NA
G4P62_000495	146.159	3.96139	0.137973	0.273044	NA
G4P62_000497	4086.22	1.18212	0.553741	0.687795	NA
G4P62_000498	51.0017	1.56412	0.457464	0.606135	NA
G4P62_000499	42.8314	2.39579	0.301829	0.461461	NA
G4P62_000500	1.31199	4.67095	0.0967645	NA	NA
G4P62_000501	31.0106	3.85051	0.145839	0.284113	NA
G4P62_000503	2327.44	2.88595	0.236224	0.39123	NA
G4P62_000504	1848.73	5.17713	0.0751278	0.180775	NA
G4P62_000505	591.687	6.79721	0.0334198	0.102672	NA
G4P62_000506	25.0737	5.11427	NA	NA	NA
G4P62_000509	6.34773	1.40388	0.495624	0.638782	NA
G4P62_000511	13348.4	12.8377	0.00163056	0.0103613	NA
G4P62_000512	343.734	1.41678	0.492437	0.635816	NA
G4P62_000513	475.914	12.7711	0.00168573	0.010632	NA
G4P62_000514	1293.59	1.00989	0.60354	0.726951	NA
G4P62_000515	41.0842	1.82373	0.401773	0.556741	NA
G4P62_000516	43.5795	2.09333	0.351107	0.510193	NA
G4P62_000517	2.63979	1.3498	0.509208	NA	NA
G4P62_000518	1967.77	0.0892702	0.956346	0.971569	NA
G4P62_000519	570.912	8.66186	0.0131553	0.052292	NA
G4P62_000520	375.183	3.71952	0.15571	0.296275	NA
G4P62_000521	1232.06	20.8209	3.0116e-05	0.000372415	NA
G4P62_000522	3358.99	0.485568	0.784441	0.859905	NA
G4P62_000523	227.826	2.80537	0.245936	0.401923	NA
G4P62_000525	268.426	1.34863	0.509504	0.650886	NA
G4P62_000526	479.926	1.3324	0.513656	0.65449	NA
G4P62_000527	31.201	0.20755	0.901428	0.937305	NA
G4P62_000528	13.591	1.44427	0.485713	0.630315	NA
G4P62_000529	80.2956	2.5069	0.285519	0.444196	NA
G4P62_000530	3280.69	0.268589	0.874332	0.920184	NA
G4P62_000531	40.0563	9.56867	0.00835967	0.0373767	NA
G4P62_000532	1578.85	1.98094	0.371402	0.528631	NA
G4P62_000533	3321.04	4.59835	0.100342	0.219882	NA
G4P62_000534	343.314	0.721937	0.697001	0.797561	NA
G4P62_000535	189.471	18.5725	9.26888e-05	0.000970391	NA
G4P62_000536	463.902	20.4592	3.60863e-05	0.000433487	NA
G4P62_000537	22.0626	1.22047	0.543224	0.6784	NA
G4P62_000538	1301.94	2.6884	0.260749	0.41755	NA
G4P62_000539	3147.78	5.58378	0.0613052	0.157351	NA
G4P62_000540	535.113	0.76396	0.682509	0.786646	NA
G4P62_000541	2081.67	31.9363	1.16179e-07	3.17941e-06	NA
G4P62_000542	272.172	29.6552	3.63462e-07	8.66508e-06	NA
G4P62_000543	2113.56	12.8704	0.00160412	0.0102352	NA
G4P62_000544	4820.82	4.89882	0.0863445	0.198301	NA
G4P62_000545	314.303	5.1951	0.0744558	0.179629	NA
G4P62_000546	40.5606	3.40392	0.182326	0.329645	NA
G4P62_000548	10.3241	6.60215	0.0368435	0.110072	NA
G4P62_000549	6.14672	10.2759	0.00586962	0.0285005	NA
G4P62_000550	4.55118	4.07288	0.130492	NA	NA
G4P62_000551	54.4254	3.31907	NA	NA	NA
G4P62_000552	4.18825	4.27944	0.117688	NA	NA
G4P62_000553	16.3238	3.41845	0.181006	0.328183	NA
G4P62_000554	157.709	21.1863	2.50873e-05	0.000320448	NA
G4P62_000555	346.789	0.058426	0.97121	0.981375	NA
G4P62_000557	94.0761	1.04874	0.591928	0.7185	NA
G4P62_000559	970.944	12.2174	0.00222348	0.0133151	NA
G4P62_000560	4328.19	32.5177	8.68689e-08	2.44019e-06	NA
G4P62_000561	11274.3	12.3209	0.00211127	0.0127695	NA
G4P62_000562	5972.6	11.3899	0.00336297	0.0184616	NA
G4P62_000563	4970.8	31.2339	1.65062e-07	4.3348e-06	NA
G4P62_000564	1046.43	10.8668	0.00436822	0.022566	NA
G4P62_000566	7108.83	14.0411	0.000893332	0.00631311	NA
G4P62_000567	1280.35	8.49101	0.0143285	0.0557029	NA
G4P62_000568	12.5224	4.63047	0.0987432	0.217511	NA
G4P62_000569	371.821	6.89933	0.0317563	0.098833	NA
G4P62_000570	2.26106	4.77807	0.0917183	NA	NA
G4P62_000571	82.7854	17.8833	0.000130828	0.00129323	NA
G4P62_000573	19.6531	0.59201	0.743784	0.830489	NA
G4P62_000574	269.075	0.694312	0.706695	0.804434	NA
G4P62_000575	6.12592	0.456282	0.796012	0.867966	NA
G4P62_000576	106.539	21.0487	2.68746e-05	0.000338936	NA
G4P62_000577	241.406	3.23808	0.198089	0.348717	NA
G4P62_000578	36.8772	1.78395	0.409845	0.563966	NA
G4P62_000579	7.22636	5.02479	0.081074	0.190248	NA
G4P62_000580	39.477	3.1996	0.201937	0.353794	NA
G4P62_000582	42.8844	5.66303	0.0589237	0.153109	NA
G4P62_000583	2.39178	0.206798	0.901767	NA	NA
G4P62_000584	792.985	5.59865	0.060851	0.156664	NA
G4P62_000585	1467.9	0.361125	0.8348	0.894686	NA
G4P62_000586	1054.48	1.27705	0.52807	0.666144	NA
G4P62_000587	109.572	17.6145	0.000149645	0.00145595	NA
G4P62_000588	997.467	6.43384	0.0400782	0.11661	NA
G4P62_000589	27.032	2.29681	0.317142	0.476103	NA
G4P62_000590	2160.34	2.11213	0.347822	0.506997	NA
G4P62_000591	257.418	9.5474	0.00844905	0.03768	NA
G4P62_000592	4001.3	7.50179	0.0234967	0.0795143	NA
G4P62_000593	125.557	0.859175	0.650777	0.762401	NA
G4P62_000595	8.5132	3.71575	0.156004	0.296722	NA
G4P62_000597	1010.42	0.0365284	0.981902	0.988018	NA
G4P62_000598	889.457	19.5415	5.7098e-05	0.000644077	NA
G4P62_000599	107.154	26.9955	1.37405e-06	2.71167e-05	NA
G4P62_000600	536.168	4.67869	0.0963907	0.21411	NA
G4P62_000602	75.0917	1.31858	0.517219	0.65741	NA
G4P62_000603	13.2727	1.11391	0.572952	0.703939	NA
G4P62_000604	140.62	1.63069	0.442486	0.591762	NA
G4P62_000605	64.1338	1.1996	0.548921	0.683801	NA
G4P62_000606	425.561	6.66213	0.0357551	0.107682	NA
G4P62_000607	2396.94	26.6466	1.6359e-06	3.14209e-05	NA
G4P62_000608	341.997	0.262766	0.876882	0.921959	NA
G4P62_000609	128.628	11.0226	0.00404093	0.0212965	NA
G4P62_000610	46.4029	9.99545	0.00675329	0.0316834	NA
G4P62_000611	75.7575	5.80956	0.0547609	0.145175	NA
G4P62_000612	1217.48	6.62779	0.0363742	0.108961	NA
G4P62_000613	6.17268	0.137516	0.933552	0.956763	NA
G4P62_000614	71.9841	6.44422	0.0398708	0.116174	NA
G4P62_000616	36.1457	12.6708	0.00177245	0.0110917	NA
G4P62_000617	1571.33	20.595	3.3717e-05	0.000409908	NA
G4P62_000618	348.673	3.88524	0.143328	0.280386	NA
G4P62_000619	977.4	0.703157	0.703577	0.802037	NA
G4P62_000620	183.552	5.05051	0.0800379	0.188519	NA
G4P62_000621	1244.53	6.81975	0.0330454	0.101786	NA
G4P62_000622	451.445	5.93845	0.0513431	0.138608	NA
G4P62_000623	1.75288	0.948299	0.622414	NA	NA
G4P62_000624	1905.41	2.03536	0.361432	0.51948	NA
G4P62_000625	87.8213	8.68976	0.0129731	0.0518229	NA
G4P62_000626	628.644	2.46924	0.290946	0.450474	NA
G4P62_000627	84.4616	0.274373	0.871808	0.91887	NA
G4P62_000628	4.47745	0.471916	0.789814	NA	NA
G4P62_000629	351.482	3.38821	0.183764	0.331366	NA
G4P62_000630	192.436	4.5359	0.103524	0.224606	NA
G4P62_000631	204.176	19.167	6.88543e-05	0.000758036	NA
G4P62_000632	24.2409	2.73797	0.254366	0.411006	NA
G4P62_000633	108.511	6.36424	0.0414975	0.119294	NA
G4P62_000634	324.784	0.732324	0.69339	0.794707	NA
G4P62_000635	1306.63	1.12011	0.571177	0.702315	NA
G4P62_000636	6171.3	5.37104	0.0681856	0.169239	NA
G4P62_000637	2989.89	2.73008	0.25537	0.412113	NA
G4P62_000638	14.7925	0.59584	0.742361	0.829439	NA
G4P62_000639	2505.28	24.7204	4.28577e-06	7.12023e-05	NA
G4P62_000640	329.742	4.33785	0.1143	0.239938	NA
G4P62_000642	180.026	6.82298	0.032992	0.101683	NA
G4P62_000643	234.54	14.1409	0.000849862	0.00605136	NA
G4P62_000644	0.856053	3.01723	0.221216	NA	NA
G4P62_000645	1029.92	28.4647	6.59135e-07	1.43101e-05	NA
G4P62_000646	2343.95	0.0841003	0.958822	0.973041	NA
G4P62_000647	209.004	4.02663	0.133546	0.267449	NA
G4P62_000648	1.85086	0.787376	0.674564	NA	NA
G4P62_000649	213.886	6.37812	0.0412105	0.118858	NA
G4P62_000650	5.14528	5.28433	NA	NA	NA
G4P62_000651	2875.96	0.829241	0.660591	0.77025	NA
G4P62_000652	2989	25.7679	2.53844e-06	4.62075e-05	NA
G4P62_000653	266.201	5.3167	0.0700638	0.172457	NA
G4P62_000654	2867	1.60393	0.448447	0.597484	NA
G4P62_000656	14.957	0.211289	0.899745	0.936314	NA
G4P62_000657	354.799	5.27287	0.0716163	0.175019	NA
G4P62_000658	2335.26	14.3171	0.00077818	0.0056014	NA
G4P62_000659	2144.01	4.89406	0.0865503	0.198638	NA
G4P62_000660	7.94096	2.19015	0.334514	0.494236	NA
G4P62_000661	1636.03	5.35157	0.0688526	0.170266	NA
G4P62_000662	186.371	13.743	0.00103692	0.00712708	NA
G4P62_000663	1438.68	22.4108	1.36008e-05	0.000192034	NA
G4P62_000664	458.245	7.89087	0.0193428	0.0694418	NA
G4P62_000665	978.757	1.57165	0.455743	0.604252	NA
G4P62_000666	4.30478	1.0319	0.596932	NA	NA
G4P62_000667	419.628	14.703	0.000641628	0.0047904	NA
G4P62_000668	1357.85	4.92546	0.0852022	0.196461	NA
G4P62_000669	894.136	0.933096	0.627164	0.744688	NA
G4P62_000670	896.391	3.63927	0.162085	0.304469	NA
G4P62_000671	7.98973	4.63435	0.0985515	0.217233	NA
G4P62_000672	593.403	0.310068	0.856386	0.908637	NA
G4P62_000673	917.305	11.4571	0.00325186	0.0179677	NA
G4P62_000674	283.542	3.44877	0.178283	0.324764	NA
G4P62_000675	1232.25	1.61827	0.445243	0.594022	NA
G4P62_000676	1195.54	26.3334	1.91323e-06	3.60636e-05	NA
G4P62_000677	923.919	10.9828	0.00412215	0.0215779	NA
G4P62_000678	6848.84	0.313078	0.855098	0.907948	NA
G4P62_000679	1.1513	0.57155	0.751432	NA	NA
G4P62_000680	580.696	1.80339	0.405881	0.560124	NA
G4P62_000681	8125.48	2.04219	0.360201	0.518187	NA
G4P62_000682	387.833	2.67713	0.262222	0.419206	NA
G4P62_000683	988.201	6.39142	0.0409375	0.118291	NA
G4P62_000685	773.019	8.23905	0.0162523	0.0609992	NA
G4P62_000686	531.829	20.8068	3.03287e-05	0.000374357	NA
G4P62_000687	198.198	0.688997	0.708576	0.805641	NA
G4P62_000688	167.44	8.26418	0.0160493	0.0605157	NA
G4P62_000689	45.2444	0.163201	0.92164	0.950143	NA
G4P62_000690	1022.58	0.453163	0.797254	0.868742	NA
G4P62_000691	176.231	8.7325	0.0126988	0.051061	NA
G4P62_000692	15.242	0.601843	0.740136	0.827896	NA
G4P62_000693	302.952	0.661072	0.718538	0.812708	NA
G4P62_000694	501.193	21.4684	2.17864e-05	0.000282761	NA
G4P62_000695	588.317	0.743372	0.689571	0.792566	NA
G4P62_000696	49.1701	1.86693	0.393189	0.548425	NA
G4P62_000697	925.161	3.12403	0.209713	0.361699	NA
G4P62_000698	336.688	4.36865	0.112553	0.237457	NA
G4P62_000700	3.48129	0.0016332	0.999184	NA	NA
G4P62_000701	328.447	3.60628	0.164781	0.307788	NA
G4P62_000702	2569.45	10.1005	0.00640769	0.0304514	NA
G4P62_000703	356.892	2.96251	0.227352	0.381899	NA
G4P62_000704	817.024	0.400419	0.818559	0.884064	NA
G4P62_000705	5987.03	10.9694	0.00414987	0.0216836	NA
G4P62_000706	2420.99	7.49533	0.0235727	0.0797314	NA
G4P62_000707	3.03627	0.600833	0.74051	NA	NA
G4P62_000708	1233.4	11.2565	0.00359495	0.0194492	NA
G4P62_000709	369.027	1.54059	0.462876	0.610699	NA
G4P62_000710	463.749	2.83161	0.24273	0.398212	NA
G4P62_000711	2.00792	3.08244	0.21412	NA	NA
G4P62_000712	282.668	21.0728	2.65522e-05	0.000335546	NA
G4P62_000713	202.565	0.810885	0.666682	0.774436	NA
G4P62_000714	363.03	12.2307	0.00220875	0.0132426	NA
G4P62_000715	1393.85	0.373553	0.829629	0.891395	NA
G4P62_000716	437.232	21.7353	1.90654e-05	0.000253481	NA
G4P62_000717	2891.83	0.0387694	0.980802	0.987272	NA
G4P62_000718	3.16202	1.40244	0.49598	NA	NA
G4P62_000719	659.838	0.39099	0.822428	0.8862	NA
G4P62_000720	757.896	16.0609	0.000325401	0.00274948	NA
G4P62_000721	7.71204	13.2443	NA	NA	NA
G4P62_000722	1104.93	14.7425	0.00062909	0.00470628	NA
G4P62_000723	57.8349	0.73578	0.692193	0.794087	NA
G4P62_000724	427.804	6.1187	0.0469183	0.130254	NA
G4P62_000725	50.77	0.39831	0.819423	0.884455	NA
G4P62_000726	502.696	17.0592	0.000197535	0.0018284	NA
G4P62_000727	62.3485	8.95669	0.0113522	0.0471796	NA
G4P62_000728	64.0599	0.0892942	0.956335	0.971569	NA
G4P62_000729	2.55428	2.07471	0.354391	NA	NA
G4P62_000730	154.743	3.24598	0.197308	0.347652	NA
G4P62_000731	126.475	34.2959	3.5705e-08	1.12874e-06	NA
G4P62_000732	56.0003	1.14987	0.562741	0.695296	NA
G4P62_000733	685.649	2.47934	0.28948	0.448773	NA
G4P62_000734	94.8585	1.43267	0.48854	0.632806	NA
G4P62_000735	309.715	5.3444	0.0691	0.170727	NA
G4P62_000736	36.1337	2.67161	0.262946	0.419926	NA
G4P62_000738	1626.08	0.861154	0.650134	0.761956	NA
G4P62_000739	66.6722	5.51544	0.0634362	0.160977	NA
G4P62_000740	2523.34	2.92151	0.232061	0.386972	NA
G4P62_000741	770.06	10.8696	0.00436212	0.0225531	NA
G4P62_000742	79.4281	2.29646	0.317198	0.476151	NA
G4P62_000743	465.092	14.5196	0.000703259	0.00516722	NA
G4P62_000744	34.8605	7.16027	0.0278719	0.0901314	NA
G4P62_000745	1896.14	6.84922	0.0325621	0.100836	NA
G4P62_000746	11.487	2.17897	0.33639	0.495898	NA
G4P62_000747	212.768	1.62719	0.443261	0.592218	NA
G4P62_000748	1048.07	11.5532	0.0030993	0.0173735	NA
G4P62_000749	247.801	9.01038	0.0110515	0.0462232	NA
G4P62_000750	1557.02	0.138256	0.933207	0.956763	NA
G4P62_000751	124.791	10.3169	0.00575059	0.0280411	NA
G4P62_000752	1223.2	0.304259	0.858877	0.910295	NA
G4P62_000753	2240.2	4.27516	0.11794	0.245231	NA
G4P62_000754	6.55254	4.70745	0.0950148	0.211986	NA
G4P62_000755	18.2143	3.60198	0.165136	0.308334	NA
G4P62_000756	94.9311	12.7555	0.00169898	0.0106917	NA
G4P62_000757	922.036	3.41296	0.181503	0.328878	NA
G4P62_000758	2128.58	12.4795	0.00195037	0.011982	NA
G4P62_000759	48.2482	19.3606	6.25033e-05	0.000696865	NA
G4P62_000760	478.399	9.44601	0.00888844	0.0391998	NA
G4P62_000761	47.9141	1.33268	0.513585	0.654441	NA
G4P62_000762	227.875	9.26043	0.00975268	0.0420483	NA
G4P62_000763	339.429	5.00928	0.0817051	0.190885	NA
G4P62_000764	1275.86	8.98735	0.0111795	0.0465961	NA
G4P62_000765	3975.07	0.348955	0.839896	0.898285	NA
G4P62_000766	2155.13	2.01831	0.364527	0.521999	NA
G4P62_000767	84.1886	6.4014	0.0407337	0.117896	NA
G4P62_000768	1202.54	0.84816	0.654372	0.765058	NA
G4P62_000769	512.891	8.93881	0.0114541	0.0474857	NA
G4P62_000770	1.33254	0.805665	0.668424	NA	NA
G4P62_000771	300.976	9.79887	0.00745078	0.0342006	NA
G4P62_000772	177.242	0.662469	0.718037	0.812468	NA
G4P62_000773	113.372	4.26593	0.118486	0.245908	NA
G4P62_000774	1.30644	1.5179	0.468157	NA	NA
G4P62_000775	12.9669	12.6047	0.00183203	0.0113945	NA
G4P62_000776	688.463	5.83956	0.0539454	0.143501	NA
G4P62_000777	6206.58	25.3446	3.13684e-06	5.52067e-05	NA
G4P62_000778	1009.09	6.0565	0.0484004	0.132923	NA
G4P62_000779	1141.82	4.97478	0.0831267	0.193244	NA
G4P62_000780	901.096	6.23846	0.0441912	0.124639	NA
G4P62_000782	23.7229	2.92646	0.231487	0.386294	NA
G4P62_000783	7074.09	6.2539	0.0438514	0.12401	NA
G4P62_000784	5.68548	0.174181	0.916594	NA	NA
G4P62_000785	1926.46	4.03249	0.133155	0.266905	NA
G4P62_000786	997.388	5.63936	0.0596249	0.154473	NA
G4P62_000787	237.57	13.3667	0.00125159	0.00831468	NA
G4P62_000788	826.631	1.38191	0.501098	0.643449	NA
G4P62_000789	6.28858	1.72356	0.42241	0.574135	NA
G4P62_000790	4.90665	2.5982	0.272778	NA	NA
G4P62_000791	18.2242	0.298013	0.861563	0.911837	NA
G4P62_000792	8.0237	0.298233	0.861469	0.911784	NA
G4P62_000794	261.75	0.49198	0.78193	0.858247	NA
G4P62_000795	1371.65	0.846629	0.654873	0.765467	NA
G4P62_000796	1753.68	4.20586	0.122098	0.251353	NA
G4P62_000797	695.535	8.69496	0.0129394	0.0517292	NA
G4P62_000798	834.206	5.7322	0.0569205	0.149503	NA
G4P62_000799	451.411	1.62993	0.442655	0.591898	NA
G4P62_000800	4167.21	7.79319	0.020311	0.0718561	NA
G4P62_000802	12.2099	3.79743	0.149761	0.289157	NA
G4P62_000803	336.33	9.21919	0.00995585	0.0426779	NA
G4P62_000804	1774.38	7.59133	0.0224679	0.0771003	NA
G4P62_000805	295.14	6.4793	0.0391775	0.114973	NA
G4P62_000806	5.92453	1.08408	0.581561	0.711063	NA
G4P62_000807	236.038	1.81905	0.402716	0.557473	NA
G4P62_000808	59.2468	4.48532	0.106176	0.228252	NA
G4P62_000809	66.53	2.42803	0.297002	0.456406	NA
G4P62_000810	3019.25	3.29376	0.19265	0.34213	NA
G4P62_000811	1165.52	10.4967	0.00525619	0.02615	NA
G4P62_000812	289.339	0.416571	0.811975	0.879571	NA
G4P62_000813	235.903	8.64579	0.0132615	0.0526309	NA
G4P62_000814	1246.51	1.67602	0.432571	0.582606	NA
G4P62_000815	829.09	12.8347	0.00163298	0.0103669	NA
G4P62_000817	2.44126	3.21059	0.20083	NA	NA
G4P62_000818	116.757	3.68957	0.15806	0.299362	NA
G4P62_000819	5248.88	1.8125	0.404036	0.558653	NA
G4P62_000820	676.536	10.2486	0.0059503	0.0287729	NA
G4P62_000821	108.806	3.67849	0.158938	0.300517	NA
G4P62_000822	4092.21	6.35841	0.0416186	0.119488	NA
G4P62_000823	614.22	0.812943	0.665996	0.773849	NA
G4P62_000825	27.3979	4.08141	0.129937	0.262254	NA
G4P62_000826	4.6524	1.58024	0.453791	NA	NA
G4P62_000827	21.4548	5.00002	0.082084	0.191571	NA
G4P62_000828	170.421	4.4974	0.105536	0.227557	NA
G4P62_000829	310.48	0.610343	0.736997	0.825713	NA
G4P62_000830	13.7581	2.32087	0.31335	0.472344	NA
G4P62_000831	75.0776	17.1768	0.000186251	0.00173912	NA
G4P62_000832	1378.61	0.848027	0.654415	0.765065	NA
G4P62_000833	1163.98	23.1021	9.62592e-06	0.000142127	NA
G4P62_000834	335.118	7.83999	0.0198412	0.0706903	NA
G4P62_000836	21.9054	1.91106	0.384608	0.54088	NA
G4P62_000837	9.37331	5.4386	0.0659209	0.165521	NA
G4P62_000838	114.86	9.80156	0.00744077	0.0341696	NA
G4P62_000840	152.432	4.43187	0.109051	0.232329	NA
G4P62_000841	364.314	8.67674	0.0130578	0.0520892	NA
G4P62_000842	79.3841	0.377669	0.827924	0.890154	NA
G4P62_000843	1009.86	6.22594	0.0444687	0.125281	NA
G4P62_000844	243.175	1.21067	0.54589	0.681063	NA
G4P62_000845	646.818	1.69141	0.429255	0.579921	NA
G4P62_000846	1005.34	2.46804	0.29112	0.450553	NA
G4P62_000847	749.271	8.0341	0.018006	0.0660285	NA
G4P62_000848	364.93	1.07368	0.584594	0.71332	NA
G4P62_000849	260.807	1.07922	0.582976	0.712005	NA
G4P62_000851	30.4964	3.70786	0.15662	0.29761	NA
G4P62_000852	238.642	0.390117	0.822786	0.886391	NA
G4P62_000853	2790.83	0.0910997	0.955472	0.971242	NA
G4P62_000854	10.158	3.28261	0.193727	0.343315	NA
G4P62_000855	3184.22	2.10476	0.349107	0.508199	NA
G4P62_000856	404.379	1.02653	0.598539	0.72326	NA
G4P62_000857	659.778	0.228768	0.891915	0.931181	NA
G4P62_000858	746.553	0.155283	0.925296	0.951964	NA
G4P62_000859	3199.44	6.23265	0.0443197	0.124931	NA
G4P62_000860	11.1229	2.63109	0.268328	0.42601	NA
G4P62_000861	356.756	0.948123	0.622469	0.740826	NA
G4P62_000862	142.44	0.326281	0.849472	0.904594	NA
G4P62_000863	348.919	2.94541	0.229305	0.383932	NA
G4P62_000864	79.6389	8.33541	0.0154878	0.0589494	NA
G4P62_000865	1444.67	3.23173	0.198719	0.349472	NA
G4P62_000866	406.807	20.583	3.39206e-05	0.000411887	NA
G4P62_000867	150.356	25.1125	3.52279e-06	6.09359e-05	NA
G4P62_000869	104.661	7.38913	0.0248583	0.0829933	NA
G4P62_000870	1242.11	12.2052	0.00223707	0.0133846	NA
G4P62_000871	2571.42	11.3222	0.00347876	0.0189732	NA
G4P62_000872	225.502	2.86236	0.239027	0.394221	NA
G4P62_000873	1599.9	1.20345	0.547866	0.682852	NA
G4P62_000874	1281.93	5.62577	0.0600315	0.15521	NA
G4P62_000875	520.003	15.1987	0.000500779	0.0038997	NA
G4P62_000876	7.45231	1.26439	0.531423	0.668764	NA
G4P62_000877	234.661	5.12034	0.0772916	0.184136	NA
G4P62_000878	3234.61	3.85244	0.145698	0.283894	NA
G4P62_000879	595.371	11.8911	0.00261752	0.0152581	NA
G4P62_000880	3.38414	2.2803	0.319771	NA	NA
G4P62_000881	23.6978	0.139994	0.932396	0.956342	NA
G4P62_000882	246.592	1.79366	0.40786	0.562009	NA
G4P62_000883	552.939	22.9504	1.03843e-05	0.000151555	NA
G4P62_000884	0.947211	3.5538	0.169162	NA	NA
G4P62_000885	290.654	5.29991	0.0706546	0.173362	NA
G4P62_000886	1144.9	7.2976	0.0260224	0.0857591	NA
G4P62_000887	13.294	2.02408	0.363477	0.521294	NA
G4P62_000888	728.206	27.2851	1.18881e-06	2.39731e-05	NA
G4P62_000889	289.882	4.38462	0.111659	0.236128	NA
G4P62_000891	615.474	6.28812	0.0431074	0.122526	NA
G4P62_000893	818.479	0.268799	0.874241	0.920136	NA
G4P62_000894	2707.51	5.95368	0.0509535	0.137867	NA
G4P62_000895	8.35662	3.79283	0.150106	0.289672	NA
G4P62_000896	397.909	0.333838	0.846268	0.902703	NA
G4P62_000897	140.75	10.279	0.00586073	0.0284832	NA
G4P62_000899	2673.29	5.30531	0.0704638	0.173041	NA
G4P62_000900	102.649	2.63512	0.267788	0.425325	NA
G4P62_000901	273.556	5.08171	0.0787991	0.186625	NA
G4P62_000903	141.105	9.47857	0.00874488	0.0386958	NA
G4P62_000904	45.0611	1.26452	0.531389	0.668764	NA
G4P62_000905	10.2657	5.20321	0.0741543	0.179202	NA
G4P62_000906	340.514	21.4411	2.20867e-05	0.000285922	NA
G4P62_000907	1241.52	1.18307	0.553476	0.687635	NA
G4P62_000908	1745.55	19.2956	6.45687e-05	0.000715935	NA
G4P62_000909	199.05	12.1938	0.00224982	0.0134369	NA
G4P62_000910	1435.54	0.822443	0.66284	0.771827	NA
G4P62_000911	1882.2	1.39417	0.498034	0.64087	NA
G4P62_000912	11.9424	0.565776	0.753604	0.837305	NA
G4P62_000913	11.3563	4.31209	0.115782	0.24178	NA
G4P62_000914	12.1489	7.27215	0.0263556	0.0865474	NA
G4P62_000915	1024.42	32.0453	1.10014e-07	3.01888e-06	NA
G4P62_000916	398.227	1.06324	0.587653	0.71555	NA
G4P62_000917	1.01068	0.0393243	0.98053	NA	NA
G4P62_000918	51.0268	5.43963	0.0658868	0.165488	NA
G4P62_000919	38.9892	21.6157	2.02398e-05	0.000266459	NA
G4P62_000920	666.587	0.257841	0.879044	0.923575	NA
G4P62_000921	110.166	4.73972	0.0934936	0.209706	NA
G4P62_000922	117.338	1.43799	0.487241	0.631647	NA
G4P62_000923	96.5764	18.477	9.72237e-05	0.0010087	NA
G4P62_000924	1681.04	6.67327	0.0355565	0.107244	NA
G4P62_000925	361	10.8967	0.00430341	0.0223354	NA
G4P62_000926	514.217	1.68125	0.431441	0.581434	NA
G4P62_000927	657.909	34.1537	3.83374e-08	1.2044e-06	NA
G4P62_000928	3071.38	16.9831	0.000205198	0.00188228	NA
G4P62_000929	361.573	1.18193	0.553793	0.687816	NA
G4P62_000930	229.182	2.78413	0.248562	0.404764	NA
G4P62_000931	34.4102	2.39075	0.302591	0.462345	NA
G4P62_000932	1595.07	0.342299	0.842696	0.900277	NA
G4P62_000933	1329.86	2.59586	0.273097	0.430892	NA
G4P62_000934	1337.81	0.714903	0.699457	0.7996	NA
G4P62_000935	342.259	1.16782	0.557713	0.691102	NA
G4P62_000936	597.712	16.428	0.000270831	0.00236467	NA
G4P62_000937	3951.75	4.98019	0.0829023	0.192967	NA
G4P62_000938	69.4279	2.1353	0.343815	0.503354	NA
G4P62_000939	787.62	0.764338	0.68238	0.786542	NA
G4P62_000940	1287.41	24.3342	5.19874e-06	8.38156e-05	NA
G4P62_000941	1.07458	0.0171432	0.991465	NA	NA
G4P62_000942	3.62716	0.543163	0.762173	NA	NA
G4P62_000943	1072.49	2.86773	0.238385	0.393743	NA
G4P62_000944	114.663	0.213042	0.898956	0.935796	NA
G4P62_000945	169.527	8.71837	0.0127888	0.0513105	NA
G4P62_000946	1200.45	1.68317	0.431026	0.581205	NA
G4P62_000947	1168.56	4.90804	0.0859472	0.197636	NA
G4P62_000948	1671.97	26.4215	1.83078e-06	3.47693e-05	NA
G4P62_000949	172.818	2.0237	0.363546	0.521318	NA
G4P62_000950	10.7677	0.218784	0.896379	0.934174	NA
G4P62_000951	729.555	2.11196	0.347852	0.506997	NA
G4P62_000952	38.8456	0.353529	0.837977	0.896946	NA
G4P62_000953	590.245	0.563605	0.754423	0.837858	NA
G4P62_000954	28.2117	3.16803	0.205149	0.357064	NA
G4P62_000955	119.888	1.86135	0.394288	0.549654	NA
G4P62_000956	60.7931	15.0747	0.000532811	0.0040985	NA
G4P62_000957	695.43	8.23473	0.0162874	0.0610824	NA
G4P62_000958	1044.11	4.39028	0.111343	0.235742	NA
G4P62_000959	5798.97	8.00179	0.0182993	0.0668055	NA
G4P62_000960	947.412	13.9439	0.000937819	0.00657223	NA
G4P62_000961	201.625	6.06735	0.0481383	0.132366	NA
G4P62_000962	792.756	8.69747	0.0129232	0.051685	NA
G4P62_000963	537.477	4.80333	0.0905669	0.205041	NA
G4P62_000964	609.824	0.377537	0.827978	0.890165	NA
G4P62_000965	9.28581	1.2125	0.545392	0.680651	NA
G4P62_000966	11853	4.63921	0.0983122	0.216872	NA
G4P62_000967	606.942	16.6274	0.000245131	0.00218524	NA
G4P62_000968	3387.82	0.604447	0.739173	0.827252	NA
G4P62_000969	38.3089	0.278098	0.870185	0.917735	NA
G4P62_000970	162.802	12.4129	0.00201636	0.0123012	NA
G4P62_000971	42.5637	5.9533	0.0509632	0.137867	NA
G4P62_000972	974.832	24.9177	3.8832e-06	6.59262e-05	NA
G4P62_000973	69.3842	0.620747	0.733173	0.823281	NA
G4P62_000974	71.1834	4.07082	0.130627	0.263251	NA
G4P62_000975	377.732	1.84284	0.397953	0.552777	NA
G4P62_000976	104.417	4.42347	0.10951	0.233041	NA
G4P62_000977	61.4974	5.62549	0.0600401	0.15521	NA
G4P62_000978	509.96	0.0210983	0.989506	0.992884	NA
G4P62_000979	35.4332	6.94597	0.0310243	0.0972837	NA
G4P62_000980	997.024	2.83562	0.242244	0.397642	NA
G4P62_000981	65.9815	3.69603	0.15755	0.298709	NA
G4P62_000982	67.4506	8.41885	0.0148549	0.0571555	NA
G4P62_000983	1761.53	26.8997	1.44143e-06	2.8062e-05	NA
G4P62_000984	13.1935	1.42788	0.489711	0.63369	NA
G4P62_000985	5009.28	2.62659	0.268932	0.426718	NA
G4P62_000986	2.69911	1.7414	0.418659	NA	NA
G4P62_000987	135.415	3.14634	0.207387	0.359223	NA
G4P62_000988	342.973	5.0143	0.0815001	0.190678	NA
G4P62_000989	1397.93	3.61577	0.164001	0.306754	NA
G4P62_000991	1244.15	5.86262	0.0533272	0.142326	NA
G4P62_000993	1358.23	7.07458	0.029092	0.0928706	NA
G4P62_000994	170.878	9.89329	0.00710723	0.0329815	NA
G4P62_000995	7.73015	3.57759	0.167161	0.311112	NA
G4P62_000996	5.30624	2.1859	0.335225	NA	NA
G4P62_000997	242.094	9.13248	0.010397	0.0441012	NA
G4P62_000998	73.012	9.71815	NA	NA	NA
G4P62_000999	25.3787	5.92395	0.0517166	0.139225	NA
G4P62_001000	1225.06	3.62545	0.163209	0.305904	NA
G4P62_001001	156.158	3.50096	0.173691	0.319128	NA
G4P62_001002	2569.52	1.97179	0.373106	0.530217	NA
G4P62_001003	36.3826	9.0099	0.0110541	0.0462232	NA
G4P62_001004	456.711	1.46457	0.48081	0.625609	NA
G4P62_001005	708.559	3.80226	0.149399	0.288624	NA
G4P62_001006	267.593	25.204	3.36535e-06	5.85136e-05	NA
G4P62_001007	1037.88	23.0998	9.63715e-06	0.000142188	NA
G4P62_001008	29.532	3.22733	0.199156	0.349863	NA
G4P62_001009	1356.62	1.94792	0.377586	0.533898	NA
G4P62_001010	433.7	1.74689	0.417511	0.570397	NA
G4P62_001011	552.488	1.39857	0.49694	0.63982	NA
G4P62_001012	45.851	8.1846	0.0167008	0.0623544	NA
G4P62_001013	5.7324	0.610623	0.736894	NA	NA
G4P62_001014	230.667	5.27683	0.0714746	0.174778	NA
G4P62_001015	1358.68	4.20526	0.122135	0.251354	NA
G4P62_001016	22.4008	10.8733	0.00435403	0.0225332	NA
G4P62_001017	312.328	3.84018	0.146594	0.285198	NA
G4P62_001018	696.881	22.2487	1.47489e-05	0.000205294	NA
G4P62_001019	354.113	2.83859	0.241885	0.397213	NA
G4P62_001020	26.3509	0.80548	0.668486	0.775756	NA
G4P62_001021	1423.06	6.22908	0.0443989	0.12512	NA
G4P62_001022	1.50703	0.979442	0.612797	NA	NA
G4P62_001023	2.68227	2.18561	0.335275	NA	NA
G4P62_001024	1378.5	4.17285	0.12413	0.254377	NA
G4P62_001025	59.8774	7.43351	0.0243127	0.0816455	NA
G4P62_001026	50.0616	1.00822	0.604043	0.72734	NA
G4P62_001027	1805.11	15.2584	0.000486051	0.00380705	NA
G4P62_001028	3.37273	2.21325	0.330674	NA	NA
G4P62_001029	5.68634	1.76247	0.414271	NA	NA
G4P62_001031	1528.8	6.39869	0.0407889	0.11798	NA
G4P62_001032	185.563	1.41362	0.493214	0.636485	NA
G4P62_001033	176.897	6.73368	0.0344985	0.104979	NA
G4P62_001034	3173.04	33.1339	6.38343e-08	1.86051e-06	NA
G4P62_001035	689.569	6.45273	0.0397016	0.115932	NA
G4P62_001036	2122.19	5.72019	0.0572632	0.150226	NA
G4P62_001037	232.581	9.07435	0.0107036	0.045	NA
G4P62_001038	1887.41	0.494871	0.780801	0.857716	NA
G4P62_001039	22.8879	0.320212	0.852053	0.906411	NA
G4P62_001040	2943.23	1.8732	0.391959	0.547297	NA
G4P62_001041	1207.54	4.1821	0.123557	0.253384	NA
G4P62_001042	1177.67	2.71371	0.257469	0.414636	NA
G4P62_001043	203.901	1.09641	0.577986	0.708352	NA
G4P62_001044	1413.37	4.16221	0.124792	0.255267	NA
G4P62_001045	713.894	0.242471	0.885826	0.927537	NA
G4P62_001046	5388.67	33.857	4.44684e-08	1.35276e-06	NA
G4P62_001047	1895.72	19.0172	7.42127e-05	0.000805944	NA
G4P62_001048	7.76199	1.4921	0.474237	0.620492	NA
G4P62_001049	6.71784	1.53128	0.465036	0.612735	NA
G4P62_001050	1180.52	3.43654	0.179376	0.32596	NA
G4P62_001051	15.5662	2.49269	0.287554	0.446644	NA
G4P62_001053	30.319	5.38358	0.0677597	0.168603	NA
G4P62_001054	37.864	4.91202	0.0857765	0.197369	NA
G4P62_001055	3633.74	8.38091	0.0151394	0.0579504	NA
G4P62_001057	10220	0.274963	0.87155	0.918705	NA
G4P62_001058	19.8639	2.96075	0.227553	0.381961	NA
G4P62_001059	216.919	2.91442	0.232885	0.387866	NA
G4P62_001060	516.488	23.1895	9.21445e-06	0.000137156	NA
G4P62_001061	39.6518	6.51576	0.0384699	0.113518	NA
G4P62_001063	0.913256	0.129702	0.937207	NA	NA
G4P62_001064	16195.3	6.7723	0.0338387	0.103659	NA
G4P62_001065	2361.73	1.54838	0.461078	0.609442	NA
G4P62_001066	258.738	1.73075	0.420894	0.573265	NA
G4P62_001067	40.0904	3.28901	0.193108	0.342611	NA
G4P62_001068	2937.56	23.9772	6.21456e-06	9.74662e-05	NA
G4P62_001069	3645.23	1.02491	0.599022	0.72354	NA
G4P62_001070	22.9743	0.616038	0.734901	0.824189	NA
G4P62_001071	2249.52	6.31957	0.0424348	0.121108	NA
G4P62_001072	30.9993	7.4049	0.024663	0.082465	NA
G4P62_001073	546.955	0.0422997	0.979072	0.98606	NA
G4P62_001074	1560.85	1.59725	0.449948	0.598694	NA
G4P62_001075	55.0853	8.9672	0.0112927	0.0469757	NA
G4P62_001076	1275.84	6.10831	0.0471626	0.130609	NA
G4P62_001077	868.072	21.8804	1.77313e-05	0.000238256	NA
G4P62_001078	209.083	1.04965	0.591659	0.718422	NA
G4P62_001079	16.7121	1.14226	0.564886	0.696874	NA
G4P62_001081	2.49453	4.35754	0.113181	NA	NA
G4P62_001082	210.53	1.13613	0.566621	0.698459	NA
G4P62_001083	737.599	3.2874	0.193264	0.342766	NA
G4P62_001084	169.568	2.09565	0.3507	0.509711	NA
G4P62_001085	1079.98	12.8298	0.00163699	0.0103793	NA
G4P62_001086	1304.84	0.899224	0.637875	0.752798	NA
G4P62_001087	546.042	4.07179	0.130564	0.263166	NA
G4P62_001088	536.662	1.83186	0.400145	0.55498	NA
G4P62_001089	2714.24	29.1392	4.70438e-07	1.07934e-05	NA
G4P62_001090	67.2861	6.74045	0.0343819	0.104766	NA
G4P62_001091	1.56453	5.269	0.0717548	NA	NA
G4P62_001092	64.9014	1.7403	0.418888	0.57175	NA
G4P62_001093	571.628	16.5302	0.000257349	0.00227453	NA
G4P62_001094	5444.29	28.4182	6.74622e-07	1.46062e-05	NA
G4P62_001095	1964.39	3.37539	0.184945	0.332575	NA
G4P62_001096	164.032	6.42937	0.040168	0.116803	NA
G4P62_001097	4626.73	0.878645	0.644473	0.757545	NA
G4P62_001098	459.11	20.5151	3.50922e-05	0.000423817	NA
G4P62_001099	2202.81	0.118229	0.942599	0.963133	NA
G4P62_001100	17835.1	33.8039	4.56648e-08	1.38498e-06	NA
G4P62_001101	3259.89	1.49815	0.472804	0.619532	NA
G4P62_001102	246.166	2.96855	0.226667	0.381204	NA
G4P62_001103	24.581	2.67522	0.262473	0.419468	NA
G4P62_001104	521.645	0.85801	0.651157	0.762714	NA
G4P62_001105	444.548	6.40224	0.0407166	0.117881	NA
G4P62_001107	45.8834	0.421782	0.809862	0.878037	NA
G4P62_001108	484.161	19.5922	5.56679e-05	0.000630059	NA
G4P62_001109	16.0514	3.43999	0.179067	0.325664	NA
G4P62_001110	2719.08	5.12687	0.0770398	0.183732	NA
G4P62_001111	864.019	13.7656	0.00102526	0.00706229	NA
G4P62_001112	742.851	9.27073	0.00970258	0.0419129	NA
G4P62_001113	103.134	0.477546	0.787594	0.862377	NA
G4P62_001114	668.184	2.78805	0.248075	0.40435	NA
G4P62_001115	219.919	1.18447	0.553091	0.68741	NA
G4P62_001116	844.141	9.70385	0.00781331	0.0355085	NA
G4P62_001117	774.772	0.683027	0.710694	0.807075	NA
G4P62_001118	97.5213	4.83677	0.0890652	0.20268	NA
G4P62_001119	69.9021	2.93192	0.230856	0.385601	NA
G4P62_001120	482.192	1.41998	0.491649	0.635197	NA
G4P62_001122	163.16	5.40682	0.0669767	0.167371	NA
G4P62_001123	1262.99	1.05652	0.58963	0.71718	NA
G4P62_001124	386.449	3.06642	0.215842	0.369143	NA
G4P62_001125	1077.6	15.2823	0.000480267	0.00377347	NA
G4P62_001127	3848.72	4.18411	0.123433	0.253232	NA
G4P62_001128	1063.96	6.09949	0.047371	0.130988	NA
G4P62_001129	1489.26	1.79657	0.407268	0.561386	NA
G4P62_001130	1177.67	7.15949	0.0278828	0.0901519	NA
G4P62_001131	4047.44	8.38203	0.0151309	0.0579504	NA
G4P62_001132	798.231	0.712757	0.700207	0.799869	NA
G4P62_001133	214.735	0.197287	0.906066	0.940329	NA
G4P62_001134	1495.26	4.43375	0.108949	0.232258	NA
G4P62_001135	138.511	2.75216	0.252567	0.409059	NA
G4P62_001136	184.386	17.2359	0.000180828	0.00169643	NA
G4P62_001138	93.4637	3.99188	0.135886	0.270364	NA
G4P62_001139	1109.63	7.69561	0.0213265	0.0745208	NA
G4P62_001140	5294.91	0.799098	0.670622	0.777221	NA
G4P62_001141	747.159	3.7053	0.156821	0.297855	NA
G4P62_001142	2556.09	9.18972	0.0101036	0.0431655	NA
G4P62_001143	25.4043	0.597332	0.741807	0.828984	NA
G4P62_001144	2.63185	0.0204158	0.989844	NA	NA
G4P62_001145	20.4826	6.86557	0.0322969	0.100124	NA
G4P62_001146	13689.1	6.8096	0.0332134	0.102163	NA
G4P62_001147	18.3221	9.88149	0.00714926	0.0331378	NA
G4P62_001148	65.0539	0.863118	0.649496	0.76159	NA
G4P62_001150	725.087	3.96383	0.137805	0.272863	NA
G4P62_001151	5991.05	2.53048	0.282172	0.440474	NA
G4P62_001152	69.5205	3.53052	0.171142	0.316356	NA
G4P62_001153	9.26999	0.376248	0.828512	0.890608	NA
G4P62_001154	970.361	1.72036	0.423085	0.574743	NA
G4P62_001155	1642.87	0.0246593	0.987746	0.991828	NA
G4P62_001156	2273.73	0.770495	0.680282	0.784663	NA
G4P62_001157	8068.96	2.42755	0.297073	0.456473	NA
G4P62_001158	647.878	19.5078	5.80681e-05	0.000653226	NA
G4P62_001159	465.516	0.90489	0.636071	0.751592	NA
G4P62_001160	10.9933	3.30806	0.191277	0.340531	NA
G4P62_001161	1500.78	7.84683	0.0197735	0.0705102	NA
G4P62_001162	2048.18	2.03505	0.361488	0.51948	NA
G4P62_001163	51.5745	4.3893	0.111398	0.235808	NA
G4P62_001164	2711.31	28.7893	5.60373e-07	1.24336e-05	NA
G4P62_001165	599.906	15.155	0.000511836	0.00396895	NA
G4P62_001166	3.4993	5.42541	0.0663571	NA	NA
G4P62_001167	40.8598	7.31836	0.0257536	0.0851936	NA
G4P62_001168	118.897	8.76972	0.0124646	0.0504379	NA
G4P62_001169	170.677	4.48772	0.106048	0.22815	NA
G4P62_001170	6.58849	1.80395	0.405768	0.560049	NA
G4P62_001171	412.947	1.55757	0.458963	0.607642	NA
G4P62_001172	3309.91	15.878	0.00035657	0.00295224	NA
G4P62_001173	546.983	2.36631	0.30631	0.4657	NA
G4P62_001174	650.961	1.52031	0.467593	0.61487	NA
G4P62_001175	1023.92	2.62453	0.26921	0.426997	NA
G4P62_001176	10.5368	0.05952	0.970678	0.981137	NA
G4P62_001177	29.7427	0.954935	0.620352	0.739648	NA
G4P62_001178	26.5941	7.64259	0.0218995	0.0757226	NA
G4P62_001179	705.408	11.2029	0.00369256	0.0198389	NA
G4P62_001180	387.58	0.705674	0.702692	0.801614	NA
G4P62_001181	10513.7	0.656148	0.72031	0.813753	NA
G4P62_001182	974.03	3.1148	0.210684	0.362845	NA
G4P62_001183	1102.99	14.5839	0.000680993	0.00503296	NA
G4P62_001184	20.7814	4.82741	0.0894832	0.203106	NA
G4P62_001185	24.8534	1.81941	0.402643	0.557409	NA
G4P62_001186	1266.75	14.5121	0.00070589	0.00518262	NA
G4P62_001187	1.4132	5.54754	0.0624262	NA	NA
G4P62_001188	454.82	4.23696	0.120214	0.248346	NA
G4P62_001189	4.90104	0.232468	0.890267	NA	NA
G4P62_001190	78.0008	1.09692	0.57784	0.708346	NA
G4P62_001191	1758.6	2.60498	0.271854	0.429579	NA
G4P62_001192	21.6559	3.21615	0.200273	0.351427	NA
G4P62_001193	216.261	11.8624	0.00265523	0.0154422	NA
G4P62_001194	1669.57	5.39981	0.067212	0.16771	NA
G4P62_001195	8255.88	2.33812	0.310659	0.469273	NA
G4P62_001196	34.608	5.74424	0.0565788	0.148799	NA
G4P62_001198	2.83198	1.21755	0.544017	NA	NA
G4P62_001200	15.2236	11.4573	0.00325153	0.0179677	NA
G4P62_001201	1793.02	5.61921	0.0602288	0.155558	NA
G4P62_001202	11.4577	0.492568	0.7817	0.858193	NA
G4P62_001203	291.419	7.5992	0.0223798	0.0769219	NA
G4P62_001204	138.898	10.2871	NA	NA	NA
G4P62_001205	535.627	1.52879	0.465615	0.613269	NA
G4P62_001206	2253.92	0.913975	0.633188	0.749364	NA
G4P62_001207	578.634	18.2147	0.000110851	0.00112746	NA
G4P62_001208	123.278	11.0277	0.00403056	0.021264	NA
G4P62_001209	68.6066	13.7009	0.00105898	0.00723938	NA
G4P62_001210	4287.72	4.57262	0.101641	0.221717	NA
G4P62_001211	101.234	8.40111	0.0149872	0.0575109	NA
G4P62_001212	595.46	9.11292	0.0104992	0.0443658	NA
G4P62_001213	4.42174	0.364024	0.833591	NA	NA
G4P62_001214	919.469	2.93448	0.230561	0.385237	NA
G4P62_001215	8776	0.347652	0.840443	0.89868	NA
G4P62_001216	229.122	6.03917	0.0488216	0.133825	NA
G4P62_001217	1613.15	0.210079	0.900289	0.936651	NA
G4P62_001218	917.892	29.5128	3.90278e-07	9.22805e-06	NA
G4P62_001219	473.89	5.35881	0.0686038	0.16988	NA
G4P62_001220	392.044	11.3302	0.00346484	0.0189229	NA
G4P62_001221	360.054	1.61357	0.44629	0.595161	NA
G4P62_001222	327.853	5.66313	0.0589205	0.153109	NA
G4P62_001223	787.409	1.61055	0.446966	0.595905	NA
G4P62_001224	2471.7	0.950828	0.621628	0.74031	NA
G4P62_001225	50.1401	0.625466	0.731445	0.821684	NA
G4P62_001226	1685.29	4.95706	0.0838665	0.194448	NA
G4P62_001227	1788.44	4.63559	0.0984907	0.217142	NA
G4P62_001228	3.93293	0.142501	0.931229	NA	NA
G4P62_001229	254.065	1.70706	0.425909	0.577302	NA
G4P62_001230	1554.56	11.0778	0.00393081	0.0208507	NA
G4P62_001231	35.9908	3.97998	0.136697	0.271335	NA
G4P62_001232	2.17819	1.97814	0.371923	NA	NA
G4P62_001233	11.5504	1.28306	0.526486	0.66479	NA
G4P62_001234	276.089	4.62317	0.0991041	0.217948	NA
G4P62_001235	1478.46	0.16596	0.92037	0.949268	NA
G4P62_001236	446.672	4.34402	0.113948	0.239473	NA
G4P62_001237	1136.07	1.0549	0.590107	0.717498	NA
G4P62_001238	263.181	7.76122	0.0206383	0.0726699	NA
G4P62_001239	418.256	7.59057	0.0224764	0.0771096	NA
G4P62_001240	492.676	5.32775	0.0696779	0.171654	NA
G4P62_001241	97.16	4.65786	NA	NA	NA
G4P62_001242	67.431	8.70849	0.0128521	0.0515132	NA
G4P62_001243	1438.61	0.303628	0.859148	0.910375	NA
G4P62_001244	118.215	11.4523	0.00325961	0.0179996	NA
G4P62_001245	131.551	8.05542	0.0178151	0.0655082	NA
G4P62_001246	909.717	2.02809	0.362748	0.520649	NA
G4P62_001247	987.465	0.267212	0.874935	0.920578	NA
G4P62_001248	718.994	5.39233	0.0674637	0.16813	NA
G4P62_001249	407.618	0.397883	0.819598	0.884505	NA
G4P62_001250	40.0744	6.45921	0.0395731	0.115635	NA
G4P62_001251	270.664	12.0682	0.00239564	0.0141404	NA
G4P62_001252	889.548	5.38362	NA	NA	NA
G4P62_001253	120.587	12.4733	0.00195636	0.0120103	NA
G4P62_001254	193.716	0.852335	0.653007	0.763994	NA
G4P62_001255	470.072	0.932471	0.627359	0.744736	NA
G4P62_001256	8.17609	0.296068	0.862402	0.912389	NA
G4P62_001257	166.791	4.08943	0.129417	0.261536	NA
G4P62_001258	1486.15	2.86285	0.238968	0.394189	NA
G4P62_001260	802.66	0.358702	0.835812	0.895342	NA
G4P62_001261	34.0126	17.8271	0.000134553	0.00132639	NA
G4P62_001262	9.44526	0.791082	0.673316	0.779212	NA
G4P62_001263	4721.19	0.45899	0.794935	0.867354	NA
G4P62_001264	95.1728	2.36521	0.30648	0.465759	NA
G4P62_001265	15.7339	0.0493413	0.975631	0.984072	NA
G4P62_001266	2505.18	5.37812	0.0679447	0.168807	NA
G4P62_001267	141.261	5.0919	0.0783985	0.186079	NA
G4P62_001268	1400.24	5.56211	0.061973	0.158474	NA
G4P62_001269	4744.02	0.577166	0.749325	0.834494	NA
G4P62_001270	323.866	0.841031	0.656708	0.767168	NA
G4P62_001271	423.398	2.00088	0.367718	0.524951	NA
G4P62_001272	29.3381	1.70191	0.427006	0.578161	NA
G4P62_001273	23.9297	0.0767697	0.962343	0.975596	NA
G4P62_001274	6.15329	3.76639	0.152103	0.292169	NA
G4P62_001275	2148.04	11.2159	0.00366853	0.0197308	NA
G4P62_001276	27.1462	6.63132	0.0363101	0.108817	NA
G4P62_001277	969.288	10.8664	0.00436909	0.022566	NA
G4P62_001278	53.6568	0.156069	0.924933	0.951893	NA
G4P62_001279	1063.6	4.48786	0.106041	0.22815	NA
G4P62_001280	110.129	0.106063	0.94835	0.966854	NA
G4P62_001281	1313.14	4.83139	0.0893054	0.202838	NA
G4P62_001282	4775.13	11.1114	0.0038653	0.0205915	NA
G4P62_001283	12589.1	1.22474	0.542065	0.677379	NA
G4P62_001284	258.521	0.0859836	0.957919	0.972591	NA
G4P62_001285	91.9196	5.70625	0.0576638	0.150963	NA
G4P62_001286	191.839	5.9982	0.0498319	0.135783	NA
G4P62_001287	271.714	32.9629	6.95351e-08	1.9978e-06	NA
G4P62_001288	208.044	3.94848	0.138867	0.27434	NA
G4P62_001289	2775.29	1.08717	0.580663	0.710384	NA
G4P62_001290	995.732	5.39761	0.0672859	0.167853	NA
G4P62_001291	86.9553	7.65265	0.0217896	0.0754981	NA
G4P62_001292	81.5203	0.792534	0.672827	0.778894	NA
G4P62_001293	273.471	6.03555	0.0489099	0.133976	NA
G4P62_001295	4.64013	0.224716	0.893724	NA	NA
G4P62_001296	138.477	12.5659	0.00186791	0.0115752	NA
G4P62_001297	29.5639	1.9011	0.386528	0.542398	NA
G4P62_001298	1592.74	14.7183	0.00063674	0.00475997	NA
G4P62_001299	2691.17	25.6032	2.7564e-06	4.93729e-05	NA
G4P62_001300	218.639	0.301382	0.860113	0.910923	NA
G4P62_001301	203.016	18.8533	8.0547e-05	0.000861327	NA
G4P62_001302	482.45	5.03	0.0808629	0.189929	NA
G4P62_001303	1594.01	3.89257	0.142804	0.279767	NA
G4P62_001304	4731.73	10.2647	0.00590277	0.0286214	NA
G4P62_001305	74.5148	6.18913	0.0452948	0.126864	NA
G4P62_001306	36.2376	9.46634	0.00879853	0.0388565	NA
G4P62_001307	519.216	11.2454	0.00361483	0.0195305	NA
G4P62_001308	897.266	5.83037	0.0541939	0.143974	NA
G4P62_001309	885.868	2.61585	0.270381	0.428248	NA
G4P62_001310	140.013	1.49687	0.473106	0.619535	NA
G4P62_001311	176.373	7.60872	0.0222735	0.076661	NA
G4P62_001312	24.8777	6.40018	0.0407586	0.117926	NA
G4P62_001314	745.799	0.603179	0.739642	0.827619	NA
G4P62_001315	7426.06	0.830619	0.660136	0.769923	NA
G4P62_001316	137.755	1.87305	0.391987	0.547297	NA
G4P62_001317	6112.29	2.12462	0.345657	0.505046	NA
G4P62_001318	1082.24	8.28524	0.0158812	0.0600501	NA
G4P62_001319	259.031	1.63341	0.441886	0.591283	NA
G4P62_001321	1403.41	2.24805	0.324969	0.484638	NA
G4P62_001322	7.7719	2.29517	0.317403	0.476322	NA
G4P62_001323	2149.44	3.78073	0.151017	0.290896	NA
G4P62_001324	394.428	2.53768	0.281157	0.439668	NA
G4P62_001325	220.889	4.10165	0.128629	0.260526	NA
G4P62_001326	343.787	2.64385	0.266622	0.42397	NA
G4P62_001327	48.5275	1.34181	0.511245	0.652486	NA
G4P62_001328	17.6094	8.71535	0.0128081	0.0513676	NA
G4P62_001329	110.762	2.49421	0.287335	0.446407	NA
G4P62_001330	88.4555	1.54302	0.462314	0.610343	NA
G4P62_001331	3.3326	4.86317	0.0878972	NA	NA
G4P62_001332	8.45807	4.48052	0.106431	0.228629	NA
G4P62_001333	3013.73	0.810121	0.666936	0.774585	NA
G4P62_001334	4552.98	4.35259	0.113461	0.238702	NA
G4P62_001335	55.6626	7.25702	0.0265557	0.087019	NA
G4P62_001337	3.46547	1.91633	0.383596	NA	NA
G4P62_001338	1181.56	0.299915	0.860745	0.911258	NA
G4P62_001339	78.9611	9.04939	0.010838	0.0454549	NA
G4P62_001340	8515.92	7.46491	0.023934	0.0806556	NA
G4P62_001341	3.9195	0.486166	0.784206	NA	NA
G4P62_001342	1.87033	0.0842397	0.958755	NA	NA
G4P62_001343	443.95	15.5435	0.000421485	0.00338315	NA
G4P62_001344	3010.1	0.0863423	0.957747	0.972591	NA
G4P62_001345	210.659	0.0472823	0.976636	0.984593	NA
G4P62_001346	7.23497	8.72502	0.0127464	0.0512114	NA
G4P62_001347	57.6341	3.01052	0.22196	0.376433	NA
G4P62_001348	828.057	8.20645	0.0165193	0.0617797	NA
G4P62_001349	4060.75	19.7617	5.11448e-05	0.000588107	NA
G4P62_001350	10.3332	0.598583	0.741343	0.828739	NA
G4P62_001351	120.707	6.21381	0.0447393	0.12585	NA
G4P62_001352	2.24308	1.85285	0.395966	NA	NA
G4P62_001353	6557.52	4.05794	0.131471	0.264608	NA
G4P62_001354	141.159	3.29143	0.192875	0.342377	NA
G4P62_001355	35.5932	3.77563	0.151402	0.291271	NA
G4P62_001356	30.0923	3.51734	0.172274	0.317575	NA
G4P62_001357	77.1295	1.80758	0.405033	0.559374	NA
G4P62_001358	81.3514	14.3435	0.000767974	0.00554574	NA
G4P62_001360	2.08081	0.474815	0.78867	NA	NA
G4P62_001361	332.995	16.7568	0.000229781	0.00207265	NA
G4P62_001362	109.634	7.76369	0.0206128	0.0726164	NA
G4P62_001363	325.53	5.72297	0.0571837	0.150116	NA
G4P62_001364	513.328	5.30542	0.0704601	0.173041	NA
G4P62_001365	1068.44	5.28909	0.0710376	0.174065	NA
G4P62_001366	16.7322	0.2699	0.87376	0.919861	NA
G4P62_001367	443.239	4.32894	0.114811	0.240609	NA
G4P62_001368	6256.01	0.471033	0.790162	0.863923	NA
G4P62_001369	915.222	0.635363	0.727835	0.819315	NA
G4P62_001370	246.332	4.16561	0.12458	0.254939	NA
G4P62_001372	941.654	6.01673	0.0493722	0.134967	NA
G4P62_001373	18.5243	7.93104	0.0189582	0.0684143	NA
G4P62_001374	2019.42	5.04108	0.0804163	0.189145	NA
G4P62_001375	236.162	10.3507	0.00565429	0.0276598	NA
G4P62_001376	8.03741	1.63196	0.442205	0.591592	NA
G4P62_001377	932.366	9.54601	0.00845495	0.0376941	NA
G4P62_001379	52.888	6.30692	0.0427042	0.121635	NA
G4P62_001380	10371.6	4.49367	0.105733	0.227742	NA
G4P62_001381	144.429	3.46528	0.176817	0.323028	NA
G4P62_001382	7216.08	29.2941	4.35383e-07	1.0105e-05	NA
G4P62_001383	1657.26	0.0553685	0.972695	0.982044	NA
G4P62_001384	13.0584	2.35672	0.307783	0.466883	NA
G4P62_001385	1086.37	14.2847	0.00079091	0.00567682	NA
G4P62_001386	4865	29.2744	4.39686e-07	1.01931e-05	NA
G4P62_001387	94.9015	0.492077	0.781892	0.858247	NA
G4P62_001388	254.727	17.2085	0.000183322	0.00171524	NA
G4P62_001389	304.937	3.16615	0.205343	0.357185	NA
G4P62_001390	593.507	1.99303	0.369164	0.526486	NA
G4P62_001391	12.1953	0.659156	0.719227	0.813122	NA
G4P62_001392	9.7796	0.476831	0.787875	0.862451	NA
G4P62_001394	206.796	5.91701	0.0518965	0.139523	NA
G4P62_001395	3.76913	1.02077	0.600265	NA	NA
G4P62_001396	780.07	8.01802	0.0181514	0.06643	NA
G4P62_001397	16.4955	4.90761	0.0859658	0.197657	NA
G4P62_001398	3449.36	0.725754	0.695672	0.796402	NA
G4P62_001399	158.21	5.85981	0.053402	0.142356	NA
G4P62_001400	13.6653	1.66248	0.43551	0.585626	NA
G4P62_001401	324.126	0.964916	0.617264	0.737186	NA
G4P62_001402	3331.73	3.14809	0.207205	0.359062	NA
G4P62_001403	14.2611	0.0847234	0.958523	0.972947	NA
G4P62_001404	13.2288	8.01768	NA	NA	NA
G4P62_001405	1942.75	14.6919	0.000645207	0.00480901	NA
G4P62_001406	36.0058	5.91085	0.0520566	0.139879	NA
G4P62_001407	27.6757	8.03842	0.0179672	0.0659471	NA
G4P62_001408	16.7946	1.91077	0.384664	0.54088	NA
G4P62_001409	2.24667	1.19518	0.550137	NA	NA
G4P62_001410	6.25324	3.58875	0.166231	0.30992	NA
G4P62_001411	12.25	1.01003	0.603498	0.726944	NA
G4P62_001412	5.57076	2.92154	0.232057	NA	NA
G4P62_001413	30.8889	1.97165	0.373132	0.530217	NA
G4P62_001414	569.427	3.16647	0.20531	0.357159	NA
G4P62_001415	1998.22	3.79701	0.149792	0.289186	NA
G4P62_001416	1536.08	0.714412	0.699628	0.79966	NA
G4P62_001417	3.10355	0.995369	0.607937	NA	NA
G4P62_001418	5.28249	2.87691	0.237294	NA	NA
G4P62_001419	242.265	7.30684	0.0259024	0.0855035	NA
G4P62_001420	39.467	11.9136	0.00258815	0.0151174	NA
G4P62_001421	26.8593	6.72112	0.0347158	0.105386	NA
G4P62_001422	9.68222	0.25816	0.878904	0.923549	NA
G4P62_001423	433.758	21.5687	2.07213e-05	0.000271488	NA
G4P62_001424	92.37	0.207576	0.901417	0.937305	NA
G4P62_001425	804.329	11.3202	0.00348223	0.0189826	NA
G4P62_001426	70.647	7.03577	0.029662	0.0941538	NA
G4P62_001427	19527.1	7.20223	0.0272932	0.0887081	NA
G4P62_001428	1270.25	0.27338	0.872241	0.919014	NA
G4P62_001429	2526.93	31.604	1.37176e-07	3.66938e-06	NA
G4P62_001430	581.655	7.90868	0.0191713	0.0689982	NA
G4P62_001431	35.8678	2.89015	0.235728	0.390697	NA
G4P62_001432	274.446	5.8703	0.0531227	0.142043	NA
G4P62_001433	9.79681	0.492889	0.781575	0.858116	NA
G4P62_001434	46.8742	6.14166	0.0463826	0.129192	NA
G4P62_001435	9.08498	2.78921	0.247931	0.404245	NA
G4P62_001436	58.0532	7.09966	0.0287295	0.0920712	NA
G4P62_001437	497.136	5.62741	0.0599825	0.155161	NA
G4P62_001438	255.303	1.79737	0.407105	0.561198	NA
G4P62_001439	6.12576	5.25676	0.0721954	0.17605	NA
G4P62_001440	1828.5	1.76627	0.413485	0.566702	NA
G4P62_001441	742.613	3.19761	0.202138	0.353931	NA
G4P62_001442	23.3307	0.900037	0.637616	0.752624	NA
G4P62_001443	146.796	5.02003	0.0812672	0.19048	NA
G4P62_001444	405.92	0.436603	0.803883	0.873385	NA
G4P62_001445	577.527	7.04311	0.0295535	0.0939128	NA
G4P62_001446	433.235	7.08278	0.028973	0.0926555	NA
G4P62_001447	610.63	0.326979	0.849175	0.904474	NA
G4P62_001448	1248.72	2.00912	0.366205	0.523458	NA
G4P62_001449	1063.91	2.50745	0.285439	0.44417	NA
G4P62_001450	145.476	2.88711	0.236087	0.391098	NA
G4P62_001451	17.5811	0.0764053	0.962518	0.975725	NA
G4P62_001452	63.6129	7.90151	0.0192402	0.0691721	NA
G4P62_001454	172.45	15.8578	0.000360179	0.00297601	NA
G4P62_001455	159.33	9.50043	0.00864985	0.0384186	NA
G4P62_001456	697.982	5.58765	0.0611866	0.157253	NA
G4P62_001457	5491.92	14.9054	0.000579861	0.0043967	NA
G4P62_001458	23.2391	17.3454	0.000171198	0.00162336	NA
G4P62_001459	34.0954	5.9942	0.0499318	0.135962	NA
G4P62_001460	47.8336	3.55515	0.169047	0.313655	NA
G4P62_001461	191.748	0.996247	0.60767	0.730312	NA
G4P62_001462	4.7151	0.885908	0.642137	NA	NA
G4P62_001463	465.081	6.08125	0.047805	0.131826	NA
G4P62_001464	124.443	9.05483	0.0108086	0.0453463	NA
G4P62_001465	50210.9	14.0061	0.000909108	0.00640107	NA
G4P62_001466	113.706	3.65778	NA	NA	NA
G4P62_001467	720.944	3.06791	0.215681	0.368985	NA
G4P62_001468	1611.15	3.64943	0.161264	0.303577	NA
G4P62_001469	245.954	3.5539	0.169153	0.313764	NA
G4P62_001470	0.854909	1.53051	0.465216	NA	NA
G4P62_001471	14.1835	6.44366	0.0398819	0.116178	NA
G4P62_001472	19.4812	6.61935	0.0365281	0.109308	NA
G4P62_001473	771.338	8.59831	0.0135801	0.0536002	NA
G4P62_001474	176.012	0.327602	0.848911	0.904473	NA
G4P62_001475	1334.52	2.05502	0.357896	0.515973	NA
G4P62_001476	45.7181	4.7347	0.0937287	0.210069	NA
G4P62_001477	491.546	4.73523	0.093704	0.210037	NA
G4P62_001478	23.7664	2.02623	0.363087	0.520957	NA
G4P62_001479	354.011	0.675748	0.713285	0.808957	NA
G4P62_001480	440.685	2.22604	0.328565	0.488165	NA
[truncated: 17,659 more rows]

## Sheet: C
Killifish Gene	Best human BLAST hit	YF1	YF2	YF3	YF4	YF5	MF1	MF2	MF3	MF4	MF5	OF1	OF3	OF4	OF5	YM1	YM2	YM3	YM5	MM1	MM2	MM3	MM5	OM1	OM3	OM4	OM5
G4P62_012446	ASZ1	6.50044	6.773	6.58853	6.6453	7.07672	5.78401	5.76771	5.74707	5.94445	6.11527	7.25326	6.90641	6.66639	7.12315	7.39857	8.03768	7.85951	8.00098	7.5847	7.62682	7.47447	7.06652	7.60973	7.68284	7.7384	7.88275
G4P62_016460	PIWIL2	9.60042	9.90518	9.64267	9.30025	10.0617	9.64543	9.29934	9.69571	9.34199	9.15763	10.2138	10.1045	9.78421	10.0912	11.0741	12.1793	12.1947	12.1563	11.5584	11.6144	11.466	11.1629	11.648	11.8892	11.882	12.0277
G4P62_016517	PIWIL1	10.377	10.6494	10.4579	10.3854	11.0992	10.3875	9.94239	9.94897	10.0831	9.82221	11.6036	11.3293	11.1128	11.3847	13.4175	14.3584	14.3823	14.3198	13.9439	13.9502	13.9891	13.8544	13.7291	13.9309	13.8427	13.988
G4P62_015504	TDRD9	9.89245	10.2892	10.0044	9.84736	10.581	9.87152	9.8196	9.86774	9.93989	9.72576	10.9023	10.6868	10.535	10.7759	11.1831	12.1526	12.2275	12.2624	11.4725	11.4341	11.3965	11.1255	11.8222	11.9043	12.2772	12.2043
G4P62_015594	EXD1	7.92573	8.20931	8.13989	7.53353	8.59596	7.95761	8.0206	7.82281	7.60928	7.79942	8.89667	8.53245	8.30746	8.28158	10.4733	10.9725	10.9061	10.8301	10.654	10.6421	10.6711	10.5375	10.4406	10.7915	10.7021	10.7374
G4P62_016002	HENMT1	9.78209	9.87879	9.86839	9.45872	10.2251	9.3044	9.8196	9.8115	10.0167	9.85145	10.2417	10.0682	9.90647	10.2606	12.4434	12.6541	12.6493	12.5963	13.0637	13.0444	13.1873	13.2546	12.701	12.707	12.5751	12.7484
G4P62_012055	TDRD1	8.72505	9.04811	9.08182	8.91033	9.83417	7.69426	7.66642	7.79379	7.48115	7.67524	9.9348	9.67158	9.23804	9.85283	10.6897	11.9352	12.0289	11.9644	11.1573	11.2253	11.1699	10.3253	11.4945	11.6094	11.6158	11.77
G4P62_017703	TDRKH	7.56354	7.76334	7.8847	7.77898	8.10857	7.36375	6.60775	7.08689	7.03951	7.09814	8.31764	8.19605	7.94976	8.44266	8.6334	9.40308	9.33194	9.33008	9.04143	9.13051	9.01107	8.36325	8.99772	9.16748	9.24455	9.34741
G4P62_007751	PLD6	9.83004	10.1686	10.0935	9.59657	10.4747	9.40232	9.54966	9.72739	9.62892	9.54335	10.6604	10.6619	10.4152	10.6987	9.11785	9.34265	9.29922	9.34118	9.21922	9.24869	9.40425	9.31967	9.18228	9.30485	9.31027	9.43135
G4P62_007781	TDRD12	9.24782	9.64117	9.38252	9.19598	9.91156	9.77999	9.48846	9.50233	9.58736	9.07878	10.1817	9.96413	9.90647	10.041	11.1287	12.1106	12.2918	12.2248	11.667	11.6493	11.6213	11.4112	11.6404	11.9949	11.874	12.1003
G4P62_008244	MYBL1	5.72483	5.82091	5.78216	5.91871	5.52647	5.52647	5.94334	5.52647	5.88876	6.15045	6.14789	5.93051	5.95208	5.75911	6.98923	7.81824	7.78028	7.77126	7.39037	7.4144	7.1829	6.9136	7.67372	7.81417	7.54572	7.90941
G4P62_012564	MOV10L1	9.70401	10.0303	9.95553	9.8352	10.6412	9.38964	9.0568	9.26091	9.12119	9.37307	10.7078	10.5161	10.2488	10.5493	10.6159	11.51	11.475	11.4937	11.0459	11.0744	11.2133	11.0381	11.062	11.2096	11.1288	11.3883
G4P62_000353	BTBD18	6.84143	7.13606	7.30951	6.90553	6.95953	7.06325	6.90254	6.44758	7.0872	6.80952	7.33104	7.33844	7.12512	7.33937	9.80771	10.5147	10.4732	10.3057	10.2569	10.35	10.3988	9.95972	10.2902	10.3468	10.2017	10.4194
G4P62_018073	TDRD1	8.14809	7.97925	8.07746	7.99587	9.05835	6.67747	6.70132	7.02023	6.85432	6.76331	9.23831	8.86438	8.04409	8.91578	9.7985	10.5199	10.4257	10.512	10.2257	10.0589	10.0943	9.66498	10.3829	10.3235	10.6577	10.6241
G4P62_004574	FKBP6	9.14863	9.72098	9.33606	9.05798	9.7111	9.23163	9.35189	9.33311	9.34417	9.0918	10.0655	9.91047	9.97483	10.0144	11.4924	11.6978	11.5422	11.66	11.4361	11.4528	11.4901	11.4863	11.1819	11.5569	11.5992	11.5942

## Sheet: D
Killifish Protein Accession	Killifish Gene ID	Human Ensembl Gene ID	Human Gene Symbol
KAF7198666.1	G4P62_019576	ENSG00000196449	YRDC
KAF7198667.1	G4P62_001429	ENSG00000258890	CEP95
KAF7198668.1	G4P62_001429	ENSG00000258890	CEP95
KAF7198669.1	G4P62_001429	ENSG00000258890	CEP95
KAF7198670.1	G4P62_019394	ENSG00000111404	RERGL
KAF7198671.1	G4P62_019953	ENSG00000253953	PCDHGB4
KAF7198672.1	G4P62_019954	ENSG00000253159	PCDHGA12
KAF7198673.1	G4P62_019955	ENSG00000253873	PCDHGA11
KAF7198674.1	G4P62_020166	ENSG00000166199	ALKBH3
KAF7198675.1	G4P62_015434	ENSG00000142684	ZNF593
KAF7198676.1	G4P62_015434	ENSG00000142684	ZNF593
KAF7198677.1	G4P62_015436	ENSG00000164830	OXR1
KAF7198679.1	G4P62_008752	ENSG00000162706	CADM3
KAF7198680.1	G4P62_019275	ENSG00000240303	ACAD11
KAF7198681.1	G4P62_020233	ENSG00000240303	ACAD11
KAF7198682.1	G4P62_019487	ENSG00000117009	KMO
KAF7198683.1	G4P62_019853	ENSG00000117009	KMO
KAF7198684.1	G4P62_014946	ENSG00000011105	TSPAN9
KAF7198685.1	G4P62_014947	ENSG00000126453	BCL2L12
KAF7198686.1	G4P62_014947	ENSG00000126453	BCL2L12
KAF7198687.1	G4P62_014947	ENSG00000126453	BCL2L12
KAF7198688.1	G4P62_014947	ENSG00000126453	BCL2L12
KAF7198689.1	G4P62_014948	ENSG00000142546	NOSIP
KAF7198690.1	G4P62_014949	ENSG00000128595	CALU
KAF7198691.1	G4P62_014949	ENSG00000142552	RCN3
KAF7198693.1	G4P62_004666	ENSG00000280071	GATD3B
KAF7198694.1	G4P62_006631	ENSG00000163141	BNIPL
KAF7198695.1	G4P62_019830	ENSG00000152804	HHEX
KAF7198696.1	G4P62_008461	ENSG00000152954	NRSN1
KAF7198697.1	G4P62_018006	ENSG00000180644	PRF1
KAF7198699.1	G4P62_018914	ENSG00000163618	CADPS
KAF7198700.1	G4P62_019478	ENSG00000163618	CADPS
KAF7198701.1	G4P62_019760	ENSG00000058673	ZC3H11A
KAF7198702.1	G4P62_007539	ENSG00000183020	AP2A2
KAF7198703.1	G4P62_007540	ENSG00000129167	TPH1
KAF7198705.1	G4P62_007542	ENSG00000110651	CD81
KAF7198706.1	G4P62_007543	ENSG00000184363	PKP3
KAF7198707.1	G4P62_007543	ENSG00000184363	PKP3
KAF7198709.1	G4P62_020182	ENSG00000280759	AP2A2
KAF7198710.1	G4P62_001715	ENSG00000165025	SYK
KAF7198711.1	G4P62_019427	ENSG00000174600	CMKLR1
KAF7198712.1	G4P62_019964	ENSG00000105509	HAS1
KAF7198713.1	G4P62_019965	ENSG00000274247	PRSS1
KAF7198714.1	G4P62_020223	ENSG00000171720	HDAC3
KAF7198715.1	G4P62_020019	ENSG00000133321	PLAAT4
KAF7198716.1	G4P62_020019	ENSG00000133321	PLAAT4
KAF7198717.1	G4P62_020019	ENSG00000133321	PLAAT4
KAF7198718.1	G4P62_020019	ENSG00000133321	PLAAT4
KAF7198719.1	G4P62_019259	ENSG00000130038	CRACR2A
KAF7198720.1	G4P62_019259	ENSG00000130038	CRACR2A
KAF7198721.1	G4P62_019482	ENSG00000130038	CRACR2A
KAF7198722.1	G4P62_018179	ENSG00000162604	TM2D1
KAF7198723.1	G4P62_019666	ENSG00000197070	ARRDC1
KAF7198724.1	G4P62_008781	ENSG00000174332	GLIS1
KAF7198725.1	G4P62_008781	ENSG00000174332	GLIS1
KAF7198726.1	G4P62_004266	ENSG00000143727	ACP1
KAF7198727.1	G4P62_004266	ENSG00000143727	ACP1
KAF7198728.1	G4P62_004267	ENSG00000189292	ALKAL2
KAF7198729.1	G4P62_004267	ENSG00000189292	ALKAL2
KAF7198731.1	G4P62_015008	ENSG00000168269	FOXI1
KAF7198732.1	G4P62_019445	ENSG00000214717	ZBED1
KAF7198733.1	G4P62_019718	ENSG00000177469	CAVIN1
KAF7198734.1	G4P62_020058	ENSG00000033627	ATP6V0A1
KAF7198735.1	G4P62_020058	ENSG00000033627	ATP6V0A1
KAF7198736.1	G4P62_019513	ENSG00000265972	TXNIP
KAF7198737.1	G4P62_018018	ENSG00000100577	GSTZ1
KAF7198738.1	G4P62_019405	ENSG00000100577	GSTZ1
KAF7198739.1	G4P62_001374	ENSG00000197694	SPTAN1
KAF7198740.1	G4P62_011413	ENSG00000180423	HARBI1
KAF7198741.1	G4P62_004842	ENSG00000125733	TRIP10
KAF7198743.1	G4P62_019376	ENSG00000071539	TRIP13
KAF7198744.1	G4P62_020047	ENSG00000169856	ONECUT1
KAF7198745.1	G4P62_020047	ENSG00000169856	ONECUT1
KAF7198747.1	G4P62_020144	ENSG00000180787	ZFP3
KAF7198748.1	G4P62_020093	ENSG00000055118	KCNH2
KAF7198749.1	G4P62_018614	ENSG00000170419	VSTM2A
KAF7198750.1	G4P62_008635	ENSG00000197694	SPTAN1
KAF7198751.1	G4P62_008635	ENSG00000197694	SPTAN1
KAF7198752.1	G4P62_011253	ENSG00000197694	SPTAN1
KAF7198753.1	G4P62_011253	ENSG00000197694	SPTAN1
KAF7198754.1	G4P62_018391	ENSG00000163075	CFAP221
KAF7198756.1	G4P62_019644	ENSG00000153404	PLEKHG4B
KAF7198757.1	G4P62_019544	ENSG00000152380	FAM151B
KAF7198758.1	G4P62_020206	ENSG00000113387	SUB1
KAF7198759.1	G4P62_017628	ENSG00000157927	RADIL
KAF7198760.1	G4P62_017628	ENSG00000157927	RADIL
KAF7198761.1	G4P62_019809	ENSG00000108669	CYTH1
KAF7198762.1	G4P62_019810	ENSG00000133477	FAM83F
KAF7198763.1	G4P62_019811	ENSG00000100351	GRAP2
KAF7198764.1	G4P62_006296	ENSG00000248098	BCKDHA
KAF7198765.1	G4P62_006297	ENSG00000170340	B3GNT2
KAF7198766.1	G4P62_019667	ENSG00000139318	DUSP6
KAF7198767.1	G4P62_018025	ENSG00000181555	SETD2
KAF7198768.1	G4P62_019442	ENSG00000152689	RASGRP3
KAF7198769.1	G4P62_015430	ENSG00000142541	RPL13A
KAF7198770.1	G4P62_015431	ENSG00000285390	ATP5IF1
KAF7198771.1	G4P62_015432	ENSG00000084073	ZMPSTE24
KAF7198773.1	G4P62_019023	ENSG00000182156	ENPP7
KAF7198774.1	G4P62_019024	ENSG00000173894	CBX2
KAF7198775.1	G4P62_019025	ENSG00000183691	NOG
KAF7198776.1	G4P62_019484	ENSG00000131781	FMO5
KAF7198778.1	G4P62_018661	ENSG00000119535	CSF3R
KAF7198779.1	G4P62_018661	ENSG00000119535	CSF3R
KAF7198781.1	G4P62_020175	ENSG00000121060	TRIM25
KAF7198782.1	G4P62_020175	ENSG00000121060	TRIM25
KAF7198783.1	G4P62_017843	ENSG00000232040	ZBED9
KAF7198784.1	G4P62_019872	ENSG00000167984	NLRC3
KAF7198785.1	G4P62_019872	ENSG00000167984	NLRC3
KAF7198786.1	G4P62_018686	ENSG00000148948	LRRC4C
KAF7198787.1	G4P62_019511	ENSG00000161610	HCRT
KAF7198788.1	G4P62_019555	ENSG00000112038	OPRM1
KAF7198789.1	G4P62_018021	ENSG00000086712	TXLNG
KAF7198790.1	G4P62_007196	ENSG00000148935	GAS2
KAF7198791.1	G4P62_007197	ENSG00000261115	TMEM178B
KAF7198792.1	G4P62_004515	ENSG00000126822	PLEKHG3
KAF7198793.1	G4P62_004515	ENSG00000126822	PLEKHG3
KAF7198794.1	G4P62_004515	ENSG00000126822	PLEKHG3
KAF7198795.1	G4P62_004515	ENSG00000126822	PLEKHG3
KAF7198796.1	G4P62_004515	ENSG00000126822	PLEKHG3
KAF7198797.1	G4P62_004515	ENSG00000126822	PLEKHG3
KAF7198798.1	G4P62_004515	ENSG00000126822	PLEKHG3
KAF7198799.1	G4P62_004519	ENSG00000165985	C1QL3
KAF7198800.1	G4P62_019263	ENSG00000170214	ADRA1B
KAF7198801.1	G4P62_020113	ENSG00000089041	P2RX7
KAF7198802.1	G4P62_020114	ENSG00000170214	ADRA1B
KAF7198803.1	G4P62_019349	ENSG00000164796	CSMD3
KAF7198804.1	G4P62_019437	ENSG00000164796	CSMD3
KAF7198805.1	G4P62_018117	ENSG00000082196	C1QTNF3
KAF7198806.1	G4P62_018117	ENSG00000082196	C1QTNF3
KAF7198808.1	G4P62_018117	ENSG00000186897	C1QL4
KAF7198809.1	G4P62_018117	ENSG00000186897	C1QL4
KAF7198810.1	G4P62_018117	ENSG00000186897	C1QL4
KAF7198811.1	G4P62_018117	ENSG00000186897	C1QL4
KAF7198812.1	G4P62_018117	ENSG00000186897	C1QL4
KAF7198813.1	G4P62_018117	ENSG00000144810	COL8A1
KAF7198814.1	G4P62_018117	ENSG00000144810	COL8A1
KAF7198815.1	G4P62_018117	ENSG00000144810	COL8A1
KAF7198816.1	G4P62_010604	ENSG00000163884	KLF15
KAF7198817.1	G4P62_010605	ENSG00000069275	NUCKS1
KAF7198819.1	G4P62_015804	ENSG00000117151	CTBS
KAF7198822.1	G4P62_020018	ENSG00000161999	JMJD8
KAF7198823.1	G4P62_003106	ENSG00000198964	SGMS1
KAF7198824.1	G4P62_001320	ENSG00000056291	NPFFR2
KAF7198825.1	G4P62_001320	ENSG00000056291	NPFFR2
KAF7198826.1	G4P62_008484	ENSG00000141759	TXNL4A
KAF7198827.1	G4P62_019161	ENSG00000174514	MFSD4A
KAF7198828.1	G4P62_019161	ENSG00000174514	MFSD4A
KAF7198829.1	G4P62_019161	ENSG00000174514	MFSD4A
KAF7198830.1	G4P62_019162	ENSG00000158711	ELK4
KAF7198831.1	G4P62_019162	ENSG00000158711	ELK4
KAF7198832.1	G4P62_019162	ENSG00000158711	ELK4
KAF7198833.1	G4P62_019162	ENSG00000158711	ELK4
KAF7198835.1	G4P62_014486	ENSG00000157445	CACNA2D3
KAF7198836.1	G4P62_014487	ENSG00000144771	LRTM1
KAF7198837.1	G4P62_020024	ENSG00000243156	MICAL3
KAF7198839.1	G4P62_019978	ENSG00000122585	NPY
KAF7198840.1	G4P62_019979	ENSG00000260325	HSPB9
KAF7198841.1	G4P62_017792	ENSG00000122565	CBX3
KAF7198842.1	G4P62_017792	ENSG00000122565	CBX3
KAF7198843.1	G4P62_017793	ENSG00000086300	SNX10
KAF7198844.1	G4P62_017793	ENSG00000086300	SNX10
KAF7198845.1	G4P62_017793	ENSG00000086300	SNX10
KAF7198846.1	G4P62_009804	ENSG00000164949	GEM
KAF7198847.1	G4P62_017637	ENSG00000025800	KPNA6
KAF7198848.1	G4P62_017638	ENSG00000084652	TXLNA
KAF7198849.1	G4P62_017639	ENSG00000084623	EIF3I
KAF7198850.1	G4P62_018979	ENSG00000175130	MARCKSL1
KAF7198851.1	G4P62_018980	ENSG00000196591	HDAC2
KAF7198852.1	G4P62_018981	ENSG00000084623	EIF3I
KAF7198853.1	G4P62_020145	ENSG00000182141	ZNF708
KAF7198854.1	G4P62_019297	ENSG00000162344	FGF19
KAF7198855.1	G4P62_019297	ENSG00000162344	FGF19
KAF7198856.1	G4P62_019292	ENSG00000165757	JCAD
KAF7198857.1	G4P62_019929	ENSG00000165757	JCAD
KAF7198858.1	G4P62_019929	ENSG00000165757	JCAD
KAF7198859.1	G4P62_019514	ENSG00000102096	PIM2
KAF7198860.1	G4P62_000524	ENSG00000214717	ZBED1
KAF7198861.1	G4P62_020177	ENSG00000170915	PAQR8
KAF7198862.1	G4P62_003257	ENSG00000153930	ANKFN1
KAF7198863.1	G4P62_005043	ENSG00000109066	TMEM104
KAF7198864.1	G4P62_018106	ENSG00000109066	TMEM104
KAF7198865.1	G4P62_018106	ENSG00000109066	TMEM104
KAF7198866.1	G4P62_018107	ENSG00000166736	HTR3A
KAF7198867.1	G4P62_018108	ENSG00000182173	TSEN54
KAF7198868.1	G4P62_018108	ENSG00000182173	TSEN54
KAF7198869.1	G4P62_018109	ENSG00000132693	CRP
KAF7198870.1	G4P62_018109	ENSG00000132693	CRP
KAF7198871.1	G4P62_019041	ENSG00000283630	FRG1
KAF7198872.1	G4P62_008621	ENSG00000106031	HOXA13
KAF7198873.1	G4P62_008622	ENSG00000106038	EVX1
KAF7198874.1	G4P62_008623	ENSG00000106049	HIBADH
KAF7198875.1	G4P62_017939	ENSG00000106052	TAX1BP1
KAF7198876.1	G4P62_017939	ENSG00000106052	TAX1BP1
KAF7198877.1	G4P62_017940	ENSG00000153814	JAZF1
KAF7198878.1	G4P62_019773	ENSG00000106049	HIBADH
KAF7198879.1	G4P62_019774	ENSG00000106031	HOXA13
KAF7198880.1	G4P62_019775	ENSG00000123388	HOXC11
KAF7198881.1	G4P62_019776	ENSG00000253293	HOXA10
KAF7198882.1	G4P62_019777	ENSG00000078399	HOXA9
KAF7198885.1	G4P62_012297	ENSG00000100138	SNU13
KAF7198886.1	G4P62_012298	ENSG00000140740	UQCRC2
KAF7198887.1	G4P62_017877	ENSG00000189403	HMGB1
KAF7198890.1	G4P62_019526	ENSG00000236177	HLA-DPA1
KAF7198891.1	G4P62_004024	ENSG00000133030	MPRIP
KAF7198892.1	G4P62_004024	ENSG00000133030	MPRIP
KAF7198893.1	G4P62_004024	ENSG00000133030	MPRIP
KAF7198894.1	G4P62_004024	ENSG00000133030	MPRIP
KAF7198895.1	G4P62_019306	ENSG00000184544	DHRS7C
KAF7198896.1	G4P62_019306	ENSG00000184544	DHRS7C
KAF7198897.1	G4P62_001974	ENSG00000110876	SELPLG
KAF7198898.1	G4P62_001974	ENSG00000110876	SELPLG
KAF7198900.1	G4P62_000991	ENSG00000133639	BTG1
KAF7198901.1	G4P62_000705	ENSG00000023734	STRAP
KAF7198902.1	G4P62_004922	ENSG00000060982	BCAT1
KAF7198903.1	G4P62_005053	ENSG00000160799	CCDC12
KAF7198906.1	G4P62_019230	ENSG00000051341	POLQ
KAF7198907.1	G4P62_004258	ENSG00000185155	MIXL1
KAF7198909.1	G4P62_020079	ENSG00000164938	TP53INP1
KAF7198910.1	G4P62_020080	ENSG00000131943	C19orf12
KAF7198911.1	G4P62_020080	ENSG00000131943	C19orf12
KAF7198912.1	G4P62_020080	ENSG00000131943	C19orf12
KAF7198913.1	G4P62_019914	ENSG00000197587	DMBX1
KAF7198914.1	G4P62_016850	ENSG00000182168	UNC5C
KAF7198915.1	G4P62_019590	ENSG00000164164	OTUD4
KAF7198916.1	G4P62_019858	ENSG00000185385	OR7A17
KAF7198918.1	G4P62_003894	ENSG00000137145	DENND4C
KAF7198919.1	G4P62_017959	ENSG00000171735	CAMTA1
KAF7198920.1	G4P62_019604	ENSG00000274619	CFD
KAF7198921.1	G4P62_019604	ENSG00000274619	CFD
KAF7198922.1	G4P62_000142	ENSG00000214717	ZBED1
KAF7198923.1	G4P62_003434	ENSG00000090447	TFAP4
KAF7198924.1	G4P62_003434	ENSG00000090447	TFAP4
KAF7198925.1	G4P62_008371	ENSG00000166147	FBN1
KAF7198928.1	G4P62_009163	ENSG00000167491	GATAD2A
KAF7198929.1	G4P62_009163	ENSG00000167491	GATAD2A
KAF7198930.1	G4P62_009163	ENSG00000167491	GATAD2A
KAF7198931.1	G4P62_009163	ENSG00000167491	GATAD2A
KAF7198932.1	G4P62_009164	ENSG00000186010	NDUFA13
KAF7198933.1	G4P62_009165	ENSG00000099622	CIRBP
KAF7198934.1	G4P62_009165	ENSG00000099622	CIRBP
KAF7198935.1	G4P62_009166	ENSG00000167470	MIDN
KAF7198936.1	G4P62_005062	ENSG00000274247	PRSS1
KAF7198937.1	G4P62_017802	ENSG00000124782	RREB1
KAF7198940.1	G4P62_005800	ENSG00000154803	FLCN
KAF7198941.1	G4P62_008497	ENSG00000079819	EPB41L2
KAF7198942.1	G4P62_013910	ENSG00000204262	COL5A2
KAF7198943.1	G4P62_019685	ENSG00000117598	PLPPR5
KAF7198944.1	G4P62_014416	ENSG00000178401	DNAJC22
KAF7198946.1	G4P62_019491	ENSG00000153531	ADPRHL1
KAF7198947.1	G4P62_008787	ENSG00000137955	RABGGTB
KAF7198948.1	G4P62_019817	ENSG00000205978	NYNRIN
KAF7198949.1	G4P62_006686	ENSG00000095139	ARCN1
KAF7198950.1	G4P62_020245	ENSG00000170264	FAM161A
KAF7198951.1	G4P62_020245	ENSG00000170264	FAM161A
KAF7198954.1	G4P62_004861	ENSG00000284931
KAF7198955.1	G4P62_002703	ENSG00000163171	CDC42EP3
KAF7198956.1	G4P62_019235	ENSG00000142156	COL6A1
KAF7198957.1	G4P62_019399	ENSG00000133661	SFTPD
KAF7198958.1	G4P62_019400	ENSG00000142156	COL6A1
KAF7198959.1	G4P62_015515	ENSG00000137193	PIM1
KAF7198960.1	G4P62_019233	ENSG00000131781	FMO5
KAF7198961.1	G4P62_019860	ENSG00000076258	FMO4
KAF7198963.1	G4P62_003205	ENSG00000108671	PSMD11
KAF7198964.1	G4P62_018224	ENSG00000145723	GIN1
KAF7198965.1	G4P62_019466	ENSG00000135736	CCDC102A
KAF7198966.1	G4P62_000784	ENSG00000226437	TRIM39
KAF7198967.1	G4P62_012629	ENSG00000104043	ATP8B4
KAF7198969.1	G4P62_008726	ENSG00000108100	CCNY
KAF7198970.1	G4P62_008727	ENSG00000166523	CLEC4E
KAF7198971.1	G4P62_010819	ENSG00000099994	SUSD2
KAF7198973.1	G4P62_019512	ENSG00000101246	ARFRP1
KAF7198974.1	G4P62_007858	ENSG00000288239	C19orf67
KAF7198975.1	G4P62_007858	ENSG00000288239	C19orf67
KAF7198976.1	G4P62_019551	ENSG00000111801	BTN3A3
KAF7198977.1	G4P62_019551	ENSG00000111801	BTN3A3
KAF7198978.1	G4P62_020231	ENSG00000111801	BTN3A3
KAF7198979.1	G4P62_019452	ENSG00000100426	ZBED4
KAF7198980.1	G4P62_016885	ENSG00000214717	ZBED1
KAF7198983.1	G4P62_019728	ENSG00000118579	MED28
KAF7198984.1	G4P62_019729	ENSG00000002549	LAP3
KAF7198985.1	G4P62_019730	ENSG00000249581	CLRN2
KAF7198986.1	G4P62_014747	ENSG00000169914	OTUD3
KAF7198987.1	G4P62_014747	ENSG00000169914	OTUD3
KAF7198988.1	G4P62_009685	ENSG00000086289	EPDR1
KAF7198989.1	G4P62_016625	ENSG00000147439	BIN3
KAF7198991.1	G4P62_004866	ENSG00000130656	HBZ
KAF7198992.1	G4P62_007784	ENSG00000184678	H2BC21
KAF7198993.1	G4P62_019493	ENSG00000105171	POP4
KAF7198994.1	G4P62_006761	ENSG00000205542	TMSB4X
KAF7198995.1	G4P62_014401	ENSG00000123307	NEUROD4
KAF7198996.1	G4P62_019545	ENSG00000221888	OR1C1
KAF7198997.1	G4P62_019546	ENSG00000284949	OR2A12
KAF7198998.1	G4P62_006107	ENSG00000184047	DIABLO
KAF7198999.1	G4P62_006107	ENSG00000184047	DIABLO
KAF7199000.1	G4P62_006107	ENSG00000184047	DIABLO
KAF7199001.1	G4P62_006107	ENSG00000184047	DIABLO
KAF7199002.1	G4P62_005752	ENSG00000158042	MRPL17
KAF7199003.1	G4P62_006757	ENSG00000046653	GPM6B
KAF7199004.1	G4P62_006759	ENSG00000123595	RAB9A
KAF7199005.1	G4P62_006759	ENSG00000123595	RAB9A
KAF7199006.1	G4P62_006759	ENSG00000123595	RAB9A
KAF7199007.1	G4P62_006759	ENSG00000123595	RAB9A
KAF7199008.1	G4P62_018807	ENSG00000183808	RBM12B
KAF7199009.1	G4P62_018807	ENSG00000183808	RBM12B
KAF7199010.1	G4P62_018807	ENSG00000278468	MUC4
KAF7199011.1	G4P62_018807	ENSG00000183808	RBM12B
KAF7199012.1	G4P62_006198	ENSG00000036828	CASR
KAF7199013.1	G4P62_006199	ENSG00000036828	CASR
KAF7199014.1	G4P62_008561	ENSG00000127995	CASD1
KAF7199015.1	G4P62_008561	ENSG00000127995	CASD1
KAF7199016.1	G4P62_019540	ENSG00000183808	RBM12B
KAF7199017.1	G4P62_019911	ENSG00000131781	FMO5
KAF7199018.1	G4P62_018151	ENSG00000243232	PCDHAC2
KAF7199019.1	G4P62_018152	ENSG00000204969	PCDHA2
KAF7199020.1	G4P62_015283	ENSG00000121858	TNFSF10
KAF7199021.1	G4P62_015283	ENSG00000121858	TNFSF10
KAF7199022.1	G4P62_019530	ENSG00000162144	CYB561A3
KAF7199023.1	G4P62_019469	ENSG00000283085	TPBG
KAF7199024.1	G4P62_010948	ENSG00000102230	PCYT1B
KAF7199025.1	G4P62_005331	ENSG00000181274	FRAT2
KAF7199026.1	G4P62_005332	ENSG00000160679	CHTOP
KAF7199028.1	G4P62_005636	ENSG00000234906	APOC2
KAF7199029.1	G4P62_005636	ENSG00000234906	APOC2
KAF7199030.1	G4P62_015163	ENSG00000117394	SLC2A1
KAF7199031.1	G4P62_015163	ENSG00000117394	SLC2A1
KAF7199034.1	G4P62_019496	ENSG00000178691	SUZ12
KAF7199036.1	G4P62_019229	ENSG00000155592	ZKSCAN2
KAF7199037.1	G4P62_006047	ENSG00000168010	ATG16L2
KAF7199038.1	G4P62_005797	ENSG00000179604	CDC42EP4
KAF7199039.1	G4P62_010599	ENSG00000124203	ZNF831
KAF7199040.1	G4P62_010599	ENSG00000124203	ZNF831
KAF7199041.1	G4P62_016623	ENSG00000102178	UBL4A
KAF7199042.1	G4P62_016624	ENSG00000185532	PRKG1
KAF7199043.1	G4P62_016624	ENSG00000185532	PRKG1
KAF7199045.1	G4P62_019620	ENSG00000143819	EPHX1
KAF7199047.1	G4P62_019857	ENSG00000279566	ZNF43
KAF7199048.1	G4P62_020222	ENSG00000159640	ACE
KAF7199049.1	G4P62_019567	ENSG00000136240	KDELR2
KAF7199050.1	G4P62_019567	ENSG00000136240	KDELR2
KAF7199051.1	G4P62_014149	ENSG00000164736	SOX17
KAF7199052.1	G4P62_016030	ENSG00000152582	SPEF2
KAF7199053.1	G4P62_015284	ENSG00000144959	NCEH1
KAF7199056.1	G4P62_019516	ENSG00000260314	MRC1
KAF7199057.1	G4P62_019866	ENSG00000058453	CROCC
KAF7199058.1	G4P62_019866	ENSG00000058453	CROCC
KAF7199059.1	G4P62_018712	ENSG00000101187	SLCO4A1
KAF7199060.1	G4P62_019892	ENSG00000145244	CORIN
KAF7199061.1	G4P62_019892	ENSG00000145244	CORIN
KAF7199062.1	G4P62_019433	ENSG00000147118	ZNF182
KAF7199063.1	G4P62_019443	ENSG00000198721	ECI2
KAF7199064.1	G4P62_019443	ENSG00000198721	ECI2
KAF7199065.1	G4P62_019443	ENSG00000198721	ECI2
KAF7199066.1	G4P62_019444	ENSG00000196584	XRCC2
KAF7199067.1	G4P62_018036	ENSG00000143776	CDC42BPA
KAF7199068.1	G4P62_019266	ENSG00000103546	SLC6A2
KAF7199069.1	G4P62_006585	ENSG00000173581	CCDC106
KAF7199070.1	G4P62_019649	ENSG00000173581	CCDC106
KAF7199071.1	G4P62_018869	ENSG00000105695	MAG
KAF7199072.1	G4P62_018870	ENSG00000108094	CUL2
KAF7199073.1	G4P62_019507	ENSG00000137288	UQCC2
KAF7199074.1	G4P62_008525	ENSG00000171243	SOSTDC1
KAF7199075.1	G4P62_012253	ENSG00000143228	NUF2
KAF7199076.1	G4P62_006572	ENSG00000135900	MRPL44
KAF7199077.1	G4P62_006574	ENSG00000168958	MFF
KAF7199078.1	G4P62_006574	ENSG00000168958	MFF
KAF7199079.1	G4P62_019670	ENSG00000175221	MED16
KAF7199080.1	G4P62_019558	ENSG00000180423	HARBI1
KAF7199081.1	G4P62_011013	ENSG00000169908	TM4SF1
KAF7199082.1	G4P62_019624	ENSG00000167306	MYO5B
KAF7199083.1	G4P62_020105	ENSG00000168701	TMEM208
KAF7199084.1	G4P62_020106	ENSG00000143570	SLC39A1
KAF7199085.1	G4P62_019298	ENSG00000036828	CASR
KAF7199087.1	G4P62_008608	ENSG00000105954	NPVF
KAF7199088.1	G4P62_020081	ENSG00000185985	SLITRK2
KAF7199089.1	G4P62_019352	ENSG00000115415	STAT1
KAF7199090.1	G4P62_019674	ENSG00000134216	CHIA
KAF7199091.1	G4P62_019675	ENSG00000134216	CHIA
KAF7199092.1	G4P62_017621	ENSG00000136010	ALDH1L2
KAF7199093.1	G4P62_010603	ENSG00000184677	ZBTB40
KAF7199094.1	G4P62_018153	ENSG00000240184	PCDHGC3
KAF7199095.1	G4P62_018154	ENSG00000255408	PCDHA3
KAF7199096.1	G4P62_018155	ENSG00000204962	PCDHA8
KAF7199097.1	G4P62_018156	ENSG00000204962	PCDHA8
KAF7199098.1	G4P62_020090	ENSG00000011422	PLAUR
KAF7199099.1	G4P62_020020	ENSG00000113389	NPR3
KAF7199100.1	G4P62_020153	ENSG00000157703	SVOPL
KAF7199101.1	G4P62_016342	ENSG00000053747	LAMA3
KAF7199103.1	G4P62_014127	ENSG00000168268	NT5DC2
KAF7199104.1	G4P62_008848	ENSG00000137077	CCL21
KAF7199105.1	G4P62_001471	ENSG00000284468	SLC25A24
KAF7199106.1	G4P62_001471	ENSG00000284468	SLC25A24
KAF7199107.1	G4P62_013101	ENSG00000189431	RASSF10
KAF7199108.1	G4P62_010559	ENSG00000011028	MRC2
KAF7199109.1	G4P62_010560	ENSG00000132825	PPP1R3D
KAF7199110.1	G4P62_015792	ENSG00000188897
KAF7199111.1	G4P62_013915	ENSG00000182405	PGBD4
KAF7199112.1	G4P62_016936	ENSG00000165244	ZNF367
KAF7199113.1	G4P62_016937	ENSG00000130958	SLC35D2
KAF7199114.1	G4P62_020214	ENSG00000036828	CASR
KAF7199115.1	G4P62_020215	ENSG00000036828	CASR
KAF7199116.1	G4P62_007585	ENSG00000103061	SLC7A6OS
KAF7199117.1	G4P62_010982	ENSG00000003096	KLHL13
KAF7199118.1	G4P62_010982	ENSG00000003096	KLHL13
KAF7199119.1	G4P62_010982	ENSG00000003096	KLHL13
KAF7199120.1	G4P62_013215	ENSG00000130035	GALNT8
KAF7199121.1	G4P62_015010	ENSG00000143867	OSR1
KAF7199122.1	G4P62_015010	ENSG00000143867	OSR1
KAF7199123.1	G4P62_015010	ENSG00000143867	OSR1
KAF7199124.1	G4P62_005124	ENSG00000102897	LYRM1
KAF7199125.1	G4P62_016105	ENSG00000275349	SMN1
KAF7199126.1	G4P62_005071	ENSG00000109906	ZBTB16
KAF7199127.1	G4P62_013580	ENSG00000143158	MPC2
KAF7199131.1	G4P62_003066	ENSG00000154478	GPR26
KAF7199132.1	G4P62_000304	ENSG00000204962	PCDHA8
KAF7199133.1	G4P62_003160	ENSG00000150722	PPP1R1C
KAF7199134.1	G4P62_009461	ENSG00000179178	TMEM125
KAF7199135.1	G4P62_019501	ENSG00000143033	MTF2
KAF7199136.1	G4P62_017616	ENSG00000182378	PLCXD1
KAF7199137.1	G4P62_014660	ENSG00000167588	GPD1
KAF7199138.1	G4P62_010906	ENSG00000141378	PTRH2
KAF7199139.1	G4P62_018342	ENSG00000116132	PRRX1
KAF7199140.1	G4P62_004929	ENSG00000108786	HSD17B1
KAF7199141.1	G4P62_002695	ENSG00000119969	HELLS
KAF7199142.1	G4P62_002696	ENSG00000183128	CALHM3
KAF7199143.1	G4P62_002283	ENSG00000180423	HARBI1
KAF7199144.1	G4P62_019502	ENSG00000135842	NIBAN1
KAF7199145.1	G4P62_014475	ENSG00000177272	KCNA3
KAF7199147.1	G4P62_003178	ENSG00000179115	FARSA
KAF7199148.1	G4P62_016490	ENSG00000277585	MUC4
KAF7199149.1	G4P62_019521	ENSG00000241839	PLEKHO2
KAF7199150.1	G4P62_019521	ENSG00000241839	PLEKHO2
KAF7199151.1	G4P62_019522	ENSG00000105171	POP4
KAF7199152.1	G4P62_019764	ENSG00000183034	OTOP2
KAF7199153.1	G4P62_019800	ENSG00000214717	ZBED1
KAF7199154.1	G4P62_017922	ENSG00000279000	OR10A6
KAF7199155.1	G4P62_017924	ENSG00000196778	OR52K1
KAF7199156.1	G4P62_019061	ENSG00000137193	PIM1
KAF7199157.1	G4P62_019062	ENSG00000102100	SLC35A2
KAF7199158.1	G4P62_003010	ENSG00000188917	TRMT2B
KAF7199159.1	G4P62_003011	ENSG00000099194	SCD
KAF7199160.1	G4P62_019595	ENSG00000099194	SCD
KAF7199161.1	G4P62_019595	ENSG00000099194	SCD
KAF7199162.1	G4P62_019690	ENSG00000283026	TCF20
KAF7199163.1	G4P62_019690	ENSG00000283026	TCF20
KAF7199164.1	G4P62_019691	ENSG00000188322	SBK1
KAF7199165.1	G4P62_019691	ENSG00000188322	SBK1
KAF7199166.1	G4P62_020148	ENSG00000179148	ALOXE3
KAF7199167.1	G4P62_006109	ENSG00000112038	OPRM1
KAF7199168.1	G4P62_019634	ENSG00000160161	CILP2
KAF7199169.1	G4P62_004613	ENSG00000138031	ADCY3
KAF7199170.1	G4P62_005886	ENSG00000189171	S100A13
KAF7199171.1	G4P62_001506	ENSG00000171345	KRT19
KAF7199172.1	G4P62_001506	ENSG00000171345	KRT19
KAF7199173.1	G4P62_019554	ENSG00000110400	NECTIN1
KAF7199175.1	G4P62_019357	ENSG00000131873	CHSY1
KAF7199176.1	G4P62_018172	ENSG00000167380	ZNF226
KAF7199177.1	G4P62_001968	ENSG00000100056	ESS2
KAF7199179.1	G4P62_001970	ENSG00000138942	RNF185
KAF7199180.1	G4P62_001970	ENSG00000138942	RNF185
KAF7199181.1	G4P62_001971	ENSG00000174600	CMKLR1
KAF7199182.1	G4P62_001972	ENSG00000136003	ISCU
KAF7199183.1	G4P62_001973	ENSG00000183160	TMEM119
KAF7199184.1	G4P62_001975	ENSG00000110876	SELPLG
KAF7199185.1	G4P62_011741	ENSG00000129932	DOHH
KAF7199186.1	G4P62_011741	ENSG00000129932	DOHH
KAF7199187.1	G4P62_011741	ENSG00000129932	DOHH
KAF7199188.1	G4P62_011741	ENSG00000129932	DOHH
KAF7199189.1	G4P62_011741	ENSG00000129932	DOHH
KAF7199190.1	G4P62_011741	ENSG00000129932	DOHH
KAF7199191.1	G4P62_001684	ENSG00000153140	CETN3
KAF7199192.1	G4P62_001684	ENSG00000153140	CETN3
KAF7199193.1	G4P62_006175	ENSG00000036828	CASR
KAF7199195.1	G4P62_019351	ENSG00000051341	POLQ
KAF7199196.1	G4P62_019619	ENSG00000026652	AGPAT4
KAF7199198.1	G4P62_018005	ENSG00000038274	MAT2B
KAF7199199.1	G4P62_020039	ENSG00000170921	TANC2
KAF7199200.1	G4P62_008032	ENSG00000117569	PTBP2
KAF7199201.1	G4P62_008032	ENSG00000117569	PTBP2
KAF7199202.1	G4P62_019448	ENSG00000158406	H4C8
KAF7199203.1	G4P62_019450	ENSG00000004776	HSPB6
KAF7199204.1	G4P62_019451	ENSG00000276076	CRYAA2
KAF7199205.1	G4P62_019391	ENSG00000119673	ACOT2
KAF7199207.1	G4P62_007055	ENSG00000132604	TERF2
KAF7199208.1	G4P62_019575	ENSG00000159640	ACE
KAF7199209.1	G4P62_016564	ENSG00000277377	SERPINA1
KAF7199210.1	G4P62_016565	ENSG00000156017	CARNMT1
KAF7199211.1	G4P62_016565	ENSG00000156017	CARNMT1
KAF7199212.1	G4P62_016566	ENSG00000135045	C9orf40
KAF7199213.1	G4P62_017447	ENSG00000160803	UBQLN4
KAF7199214.1	G4P62_019434	ENSG00000198838	RYR3
KAF7199215.1	G4P62_019367	ENSG00000116668	SWT1
KAF7199216.1	G4P62_019368	ENSG00000116668	SWT1
KAF7199217.1	G4P62_002872	ENSG00000118482	PHF3
KAF7199218.1	G4P62_002872	ENSG00000118482	PHF3
KAF7199219.1	G4P62_002873	ENSG00000188107	EYS
KAF7199220.1	G4P62_001183	ENSG00000119231	SENP5
KAF7199221.1	G4P62_001183	ENSG00000119231	SENP5
KAF7199222.1	G4P62_001183	ENSG00000079387	SENP1
KAF7199223.1	G4P62_001183	ENSG00000119231	SENP5
KAF7199225.1	G4P62_012569	ENSG00000106479	ZNF862
KAF7199226.1	G4P62_018783	ENSG00000132109	TRIM21
KAF7199227.1	G4P62_019287	ENSG00000173275	ZNF449
KAF7199229.1	G4P62_005804	ENSG00000108106	UBE2S
KAF7199230.1	G4P62_020243	ENSG00000182612	TSPAN10
KAF7199231.1	G4P62_019870	ENSG00000176903	PNMA1
KAF7199232.1	G4P62_019535	ENSG00000181817	LSM10
KAF7199233.1	G4P62_019535	ENSG00000181817	LSM10
KAF7199234.1	G4P62_019535	ENSG00000181817	LSM10
KAF7199235.1	G4P62_019536	ENSG00000116885	OSCP1
KAF7199236.1	G4P62_019536	ENSG00000116885	OSCP1
KAF7199237.1	G4P62_019536	ENSG00000116885	OSCP1
KAF7199238.1	G4P62_019643	ENSG00000243156	MICAL3
KAF7199241.1	G4P62_005475	ENSG00000166523	CLEC4E
KAF7199243.1	G4P62_019366	ENSG00000168875	SOX14
KAF7199245.1	G4P62_020046	ENSG00000187912	CLEC17A
KAF7199246.1	G4P62_017739	ENSG00000141665	FBXO15
KAF7199247.1	G4P62_017740	ENSG00000127334	DYRK2
KAF7199248.1	G4P62_019471	ENSG00000160961	ZNF333
KAF7199249.1	G4P62_018768	ENSG00000182405	PGBD4
KAF7199250.1	G4P62_019409	ENSG00000178662	CSRNP3
KAF7199251.1	G4P62_019409	ENSG00000178662	CSRNP3
KAF7199252.1	G4P62_017853	ENSG00000165030	NFIL3
KAF7199253.1	G4P62_017853	ENSG00000165030	NFIL3
KAF7199254.1	G4P62_017854	ENSG00000165030	NFIL3
KAF7199255.1	G4P62_020168	ENSG00000164344	KLKB1
KAF7199256.1	G4P62_019485	ENSG00000159640	ACE
KAF7199257.1	G4P62_018913	ENSG00000154237	LRRK1
KAF7199259.1	G4P62_019548	ENSG00000162009	SSTR5
KAF7199260.1	G4P62_012596	ENSG00000284024
KAF7199261.1	G4P62_004207	ENSG00000145723	GIN1
KAF7199262.1	G4P62_020239	ENSG00000166707	ZCCHC18
KAF7199264.1	G4P62_019532	ENSG00000214717	ZBED1
KAF7199265.1	G4P62_019600	ENSG00000113812	ACTR8
KAF7199266.1	G4P62_020196	ENSG00000132535	DLG4
KAF7199268.1	G4P62_019717	ENSG00000179144	GIMAP7
KAF7199269.1	G4P62_019355	ENSG00000132872	SYT4
KAF7199272.1	G4P62_019543	ENSG00000164483	SAMD3
KAF7199274.1	G4P62_019328	ENSG00000166363	OR10A5
KAF7199280.1	G4P62_009108	ENSG00000171951	SCG2
KAF7199281.1	G4P62_009109	ENSG00000152056	AP1S3
KAF7199282.1	G4P62_009109	ENSG00000106367	AP1S1
KAF7199283.1	G4P62_009110	ENSG00000102796	DHRS12
KAF7199284.1	G4P62_009111	ENSG00000036257	CUL3
KAF7199285.1	G4P62_019996	ENSG00000169181	GSG1L
KAF7199286.1	G4P62_019627	ENSG00000186897	C1QL4
KAF7199287.1	G4P62_019627	ENSG00000186897	C1QL4
KAF7199288.1	G4P62_006710	ENSG00000169762	TAPT1
KAF7199289.1	G4P62_006710	ENSG00000169762	TAPT1
KAF7199290.1	G4P62_006710	ENSG00000169762	TAPT1
KAF7199294.1	G4P62_019650	ENSG00000164007	CLDN19
KAF7199295.1	G4P62_019650	ENSG00000164007	CLDN19
KAF7199296.1	G4P62_019326	ENSG00000196605	ZNF846
KAF7199297.1	G4P62_018047	ENSG00000130045	NXNL2
KAF7199298.1	G4P62_018048	ENSG00000242616	GNG10
KAF7199299.1	G4P62_018048	ENSG00000242616	GNG10
KAF7199300.1	G4P62_018049	ENSG00000174808	BTC
KAF7199301.1	G4P62_018049	ENSG00000174808	BTC
KAF7199302.1	G4P62_018050	ENSG00000277069	RXFP3
KAF7199303.1	G4P62_017465	ENSG00000186350	RXRA
KAF7199304.1	G4P62_017465	ENSG00000186350	RXRA
KAF7199305.1	G4P62_017465	ENSG00000186350	RXRA
KAF7199306.1	G4P62_017465	ENSG00000186350	RXRA
KAF7199307.1	G4P62_019767	ENSG00000061492	WNT8A
KAF7199308.1	G4P62_019768	ENSG00000061492	WNT8A
KAF7199309.1	G4P62_019769	ENSG00000217442	SYCE3
KAF7199310.1	G4P62_019770	ENSG00000168269	FOXI1
KAF7199311.1	G4P62_000974	ENSG00000127720	METTL25
KAF7199312.1	G4P62_000975	ENSG00000133773	CCDC59
KAF7199313.1	G4P62_000976	ENSG00000130038	CRACR2A
KAF7199314.1	G4P62_000976	ENSG00000130038	CRACR2A
KAF7199315.1	G4P62_000976	ENSG00000130038	CRACR2A
KAF7199316.1	G4P62_000977	ENSG00000111218	PRMT8
KAF7199317.1	G4P62_000977	ENSG00000111218	PRMT8
KAF7199318.1	G4P62_000978	ENSG00000110900	TSPAN11
KAF7199319.1	G4P62_000978	ENSG00000110900	TSPAN11
KAF7199320.1	G4P62_020000	ENSG00000197233	OR1J2
KAF7199321.1	G4P62_020001	ENSG00000221888	OR1C1
KAF7199322.1	G4P62_020002	ENSG00000180016	OR1E1
KAF7199323.1	G4P62_020003	ENSG00000221888	OR1C1
KAF7199324.1	G4P62_019384	ENSG00000149582	TMEM25
KAF7199325.1	G4P62_019385	ENSG00000167286	CD3D
KAF7199326.1	G4P62_019386	ENSG00000198851	CD3E
KAF7199327.1	G4P62_019603	ENSG00000149582	TMEM25
KAF7199329.1	G4P62_019962	ENSG00000052802	MSMO1
KAF7199330.1	G4P62_019962	ENSG00000052802	MSMO1
KAF7199331.1	G4P62_019962	ENSG00000052802	MSMO1
KAF7199332.1	G4P62_019963	ENSG00000109472	CPE
KAF7199333.1	G4P62_019286	ENSG00000165832	TRUB1
KAF7199334.1	G4P62_019286	ENSG00000165832	TRUB1
KAF7199335.1	G4P62_019903	ENSG00000165832	TRUB1
KAF7199336.1	G4P62_020169	ENSG00000152034	MCHR2
KAF7199337.1	G4P62_019995	ENSG00000153446	C16orf89
KAF7199338.1	G4P62_020125	ENSG00000140265	ZSCAN29
KAF7199340.1	G4P62_018131	ENSG00000159261	CLDN14
KAF7199341.1	G4P62_018132	ENSG00000115665	SLC5A7
KAF7199342.1	G4P62_003830	ENSG00000196832	OR11G2
KAF7199343.1	G4P62_019348	ENSG00000276119	OR13C2
KAF7199344.1	G4P62_019410	ENSG00000276119	OR13C2
KAF7199345.1	G4P62_017934	ENSG00000113739	STC2
KAF7199346.1	G4P62_017935	ENSG00000113742	CPEB4
KAF7199347.1	G4P62_014967	ENSG00000185215	TNFAIP2
KAF7199348.1	G4P62_014968	ENSG00000205436	EXOC3L4
KAF7199349.1	G4P62_017911	ENSG00000174611	KY
KAF7199350.1	G4P62_017917	ENSG00000220008	LINGO3
KAF7199351.1	G4P62_017917	ENSG00000220008	LINGO3
KAF7199352.1	G4P62_016400	ENSG00000089154	GCN1
KAF7199353.1	G4P62_016401	ENSG00000111737	RAB35
KAF7199354.1	G4P62_019268	ENSG00000159917	ZNF235
KAF7199355.1	G4P62_018030	ENSG00000180423	HARBI1
KAF7199356.1	G4P62_018030	ENSG00000180423	HARBI1
KAF7199357.1	G4P62_018030	ENSG00000180423	HARBI1
KAF7199358.1	G4P62_019377	ENSG00000178971	CTC1
KAF7199359.1	G4P62_019377	ENSG00000178971	CTC1
KAF7199360.1	G4P62_020116	ENSG00000185245	GP1BA
KAF7199361.1	G4P62_020117	ENSG00000166391	MOGAT2
KAF7199362.1	G4P62_018713	ENSG00000101188	NTSR1
KAF7199366.1	G4P62_019090	ENSG00000162896	PIGR
KAF7199367.1	G4P62_019091	ENSG00000204345	CD300LD
KAF7199368.1	G4P62_019092	ENSG00000275031	METRNL
KAF7199369.1	G4P62_019093	ENSG00000277033	B3GNTL1
KAF7199370.1	G4P62_019093	ENSG00000277033	B3GNTL1
KAF7199371.1	G4P62_019093	ENSG00000277033	B3GNTL1
KAF7199372.1	G4P62_019093	ENSG00000277033	B3GNTL1
KAF7199373.1	G4P62_019846	ENSG00000162896	PIGR
KAF7199374.1	G4P62_019859	ENSG00000162896	PIGR
KAF7199375.1	G4P62_005046	ENSG00000141179	PCTP
KAF7199376.1	G4P62_005047	ENSG00000166292	TMEM100
KAF7199377.1	G4P62_005048	ENSG00000108960	MMD
KAF7199378.1	G4P62_005048	ENSG00000108960	MMD
KAF7199379.1	G4P62_005049	ENSG00000108924	HLF
KAF7199380.1	G4P62_019059	ENSG00000145901	TNIP1
KAF7199381.1	G4P62_019059	ENSG00000145901	TNIP1
KAF7199382.1	G4P62_019059	ENSG00000145901	TNIP1
KAF7199383.1	G4P62_020162	ENSG00000145901	TNIP1
KAF7199384.1	G4P62_018841	ENSG00000129084	PSMA1
KAF7199385.1	G4P62_018842	ENSG00000166405	RIC3
KAF7199386.1	G4P62_018842	ENSG00000166405	RIC3
KAF7199387.1	G4P62_018842	ENSG00000166405	RIC3
KAF7199388.1	G4P62_018843	ENSG00000166407	LMO1
KAF7199389.1	G4P62_001106	ENSG00000153976	HS3ST3A1
KAF7199390.1	G4P62_001107	ENSG00000169181	GSG1L
KAF7199391.1	G4P62_018728	ENSG00000011422	PLAUR
KAF7199392.1	G4P62_018729	ENSG00000011422	PLAUR
KAF7199393.1	G4P62_018730	ENSG00000105771	SMG9
KAF7199394.1	G4P62_018731	ENSG00000281709	ZNF197
KAF7199395.1	G4P62_018732	ENSG00000080709	KCNN2
KAF7199396.1	G4P62_018733	ENSG00000154640	BTG3
KAF7199397.1	G4P62_018734	ENSG00000182310	SPACA6
KAF7199400.1	G4P62_019912	ENSG00000139117	CPNE8
KAF7199401.1	G4P62_019989	ENSG00000139117	CPNE8
KAF7199402.1	G4P62_019989	ENSG00000139117	CPNE8
KAF7199403.1	G4P62_006669	ENSG00000134812	CBLIF
KAF7199404.1	G4P62_012363	ENSG00000175595	ERCC4
KAF7199405.1	G4P62_012364	ENSG00000186260	MRTFB
KAF7199406.1	G4P62_012365	ENSG00000153443	UBALD1
KAF7199407.1	G4P62_012365	ENSG00000153443	UBALD1
KAF7199408.1	G4P62_012366	ENSG00000129654	FOXJ1
KAF7199409.1	G4P62_012367	ENSG00000180423	HARBI1
KAF7199410.1	G4P62_020048	ENSG00000007384	RHBDF1
KAF7199411.1	G4P62_019016	ENSG00000074276	CDHR2
KAF7199412.1	G4P62_019017	ENSG00000146083	RNF44
KAF7199413.1	G4P62_019018	ENSG00000113194	FAF2
KAF7199414.1	G4P62_019018	ENSG00000113194	FAF2
KAF7199415.1	G4P62_019018	ENSG00000113194	FAF2
KAF7199416.1	G4P62_019019	ENSG00000102309	PIN4
KAF7199417.1	G4P62_019020	ENSG00000184845	DRD1
KAF7199418.1	G4P62_019677	ENSG00000074276	CDHR2
KAF7199419.1	G4P62_019678	ENSG00000169258	GPRIN1
KAF7199420.1	G4P62_019679	ENSG00000074317	SNCB
KAF7199421.1	G4P62_019679	ENSG00000074317	SNCB
KAF7199422.1	G4P62_017968	ENSG00000108576	SLC6A4
KAF7199423.1	G4P62_017969	ENSG00000185565	LSAMP
KAF7199424.1	G4P62_019323	ENSG00000172260	NEGR1
KAF7199425.1	G4P62_019900	ENSG00000004700	RECQL
KAF7199426.1	G4P62_008634	ENSG00000123500	COL10A1
KAF7199427.1	G4P62_012446	ENSG00000154438	ASZ1
KAF7199428.1	G4P62_012447	ENSG00000001626	CFTR
KAF7199429.1	G4P62_000790	ENSG00000137474	MYO7A
KAF7199430.1	G4P62_005929	ENSG00000149269	PAK1
KAF7199431.1	G4P62_005930	ENSG00000178301	AQP11
KAF7199432.1	G4P62_005931	ENSG00000074201	CLNS1A
KAF7199433.1	G4P62_005931	ENSG00000074201	CLNS1A
KAF7199434.1	G4P62_005932	ENSG00000110660	SLC35F2
KAF7199435.1	G4P62_005933	ENSG00000137692	DCUN1D5
KAF7199437.1	G4P62_018146	ENSG00000140471	LINS1
KAF7199438.1	G4P62_018147	ENSG00000183475	ASB7
KAF7199439.1	G4P62_018147	ENSG00000183475	ASB7
KAF7199440.1	G4P62_018147	ENSG00000183475	ASB7
KAF7199441.1	G4P62_018157	ENSG00000154237	LRRK1
KAF7199442.1	G4P62_019868	ENSG00000140471	LINS1
KAF7199443.1	G4P62_007631	ENSG00000071242	RPS6KA2
KAF7199444.1	G4P62_007632	ENSG00000148950	IMMP1L
KAF7199445.1	G4P62_007633	ENSG00000109911	ELP4
KAF7199446.1	G4P62_007634	ENSG00000007372	PAX6
KAF7199447.1	G4P62_007634	ENSG00000007372	PAX6
KAF7199448.1	G4P62_007635	ENSG00000049449	RCN1
KAF7199449.1	G4P62_007636	ENSG00000184937	WT1
KAF7199450.1	G4P62_007637	ENSG00000149100	EIF3M
KAF7199451.1	G4P62_019519	ENSG00000135378	PRRG4
KAF7199453.1	G4P62_013266	ENSG00000044524	EPHA3
KAF7199454.1	G4P62_013266	ENSG00000044524	EPHA3
KAF7199455.1	G4P62_013266	ENSG00000044524	EPHA3
KAF7199456.1	G4P62_013266	ENSG00000044524	EPHA3
KAF7199457.1	G4P62_013266	ENSG00000044524	EPHA3
KAF7199458.1	G4P62_013266	ENSG00000044524	EPHA3
KAF7199459.1	G4P62_020072	ENSG00000178750	STX19
KAF7199460.1	G4P62_012437	ENSG00000285137	MGAT4C
KAF7199461.1	G4P62_012437	ENSG00000285137	MGAT4C
KAF7199462.1	G4P62_012437	ENSG00000285137	MGAT4C
KAF7199463.1	G4P62_012437	ENSG00000285137	MGAT4C
KAF7199464.1	G4P62_012437	ENSG00000285137	MGAT4C
KAF7199466.1	G4P62_012441	ENSG00000198774	RASSF9
KAF7199469.1	G4P62_003627	ENSG00000009307	CSDE1
KAF7199470.1	G4P62_003627	ENSG00000009307	CSDE1
KAF7199471.1	G4P62_003628	ENSG00000112640	PPP2R5D
KAF7199473.1	G4P62_003630	ENSG00000124733	MEA1
KAF7199474.1	G4P62_003630	ENSG00000124733	MEA1
KAF7199475.1	G4P62_003631	ENSG00000204052	LRRC73
KAF7199476.1	G4P62_003631	ENSG00000204052	LRRC73
KAF7199477.1	G4P62_003631	ENSG00000204052	LRRC73
KAF7199478.1	G4P62_003632	ENSG00000171462	DLK2
KAF7199479.1	G4P62_003632	ENSG00000171462	DLK2
KAF7199480.1	G4P62_014144	ENSG00000167984	NLRC3
KAF7199481.1	G4P62_014145	ENSG00000171681	ATF7IP
KAF7199482.1	G4P62_014145	ENSG00000171681	ATF7IP
KAF7199483.1	G4P62_019744	ENSG00000213853	EMP2
KAF7199484.1	G4P62_019744	ENSG00000213853	EMP2
KAF7199487.1	G4P62_019755	ENSG00000137221	TJAP1
KAF7199488.1	G4P62_020073	ENSG00000140265	ZSCAN29
KAF7199489.1	G4P62_020074	ENSG00000137221	TJAP1
KAF7199490.1	G4P62_014719	ENSG00000075043	KCNQ2
KAF7199491.1	G4P62_014719	ENSG00000075043	KCNQ2
KAF7199492.1	G4P62_014719	ENSG00000075043	KCNQ2
KAF7199493.1	G4P62_014720	ENSG00000124126	PREX1
KAF7199494.1	G4P62_014721	ENSG00000170471	RALGAPB
KAF7199495.1	G4P62_014721	ENSG00000170471	RALGAPB
KAF7199496.1	G4P62_014721	ENSG00000170471	RALGAPB
KAF7199497.1	G4P62_014721	ENSG00000170471	RALGAPB
KAF7199498.1	G4P62_014721	ENSG00000170471	RALGAPB
KAF7199499.1	G4P62_014721	ENSG00000170471	RALGAPB
KAF7199500.1	G4P62_014721	ENSG00000170471	RALGAPB
KAF7199501.1	G4P62_014722	ENSG00000179403	VWA1
KAF7199502.1	G4P62_014723	ENSG00000162542	TMCO4
KAF7199503.1	G4P62_014723	ENSG00000162542	TMCO4
KAF7199504.1	G4P62_014724	ENSG00000158748	HTR6
KAF7199505.1	G4P62_014725	ENSG00000173436	MICOS10
KAF7199506.1	G4P62_014726	ENSG00000052723	SIKE1
KAF7199507.1	G4P62_014727	ENSG00000009307	CSDE1
KAF7199508.1	G4P62_014727	ENSG00000009307	CSDE1
KAF7199509.1	G4P62_014727	ENSG00000009307	CSDE1
KAF7199510.1	G4P62_014727	ENSG00000009307	CSDE1
KAF7199511.1	G4P62_014727	ENSG00000009307	CSDE1
KAF7199512.1	G4P62_014727	ENSG00000009307	CSDE1
KAF7199513.1	G4P62_014727	ENSG00000009307	CSDE1
KAF7199514.1	G4P62_014727	ENSG00000009307	CSDE1
KAF7199515.1	G4P62_014727	ENSG00000009307	CSDE1
KAF7199516.1	G4P62_014727	ENSG00000009307	CSDE1
KAF7199517.1	G4P62_014728	ENSG00000188157	AGRN
KAF7199518.1	G4P62_014728	ENSG00000188157	AGRN
KAF7199519.1	G4P62_014728	ENSG00000188157	AGRN
KAF7199520.1	G4P62_014728	ENSG00000188157	AGRN
KAF7199521.1	G4P62_014728	ENSG00000188157	AGRN
KAF7199522.1	G4P62_014728	ENSG00000188157	AGRN
KAF7199523.1	G4P62_014728	ENSG00000188157	AGRN
KAF7199524.1	G4P62_014728	ENSG00000188157	AGRN
KAF7199525.1	G4P62_014729	ENSG00000198793	MTOR
KAF7199526.1	G4P62_014730	ENSG00000171819	ANGPTL7
KAF7199527.1	G4P62_014731	ENSG00000219438	TAFA5
KAF7199528.1	G4P62_014732	ENSG00000156711	MAPK13
KAF7199529.1	G4P62_014733	ENSG00000096070	BRPF3
KAF7199530.1	G4P62_014733	ENSG00000096070	BRPF3
KAF7199531.1	G4P62_014734	ENSG00000012504	NR1H4
KAF7199532.1	G4P62_014735	ENSG00000040487	SLC66A1
KAF7199533.1	G4P62_014735	ENSG00000040487	SLC66A1
KAF7199534.1	G4P62_014735	ENSG00000040487	SLC66A1
KAF7199535.1	G4P62_014736	ENSG00000215397	SCRT2
KAF7199536.1	G4P62_014737	ENSG00000101276	SLC52A3
KAF7199537.1	G4P62_014738	ENSG00000244687	UBE2V1
KAF7199538.1	G4P62_014739	ENSG00000240849	PEDS1
KAF7199539.1	G4P62_014740	ENSG00000196396	PTPN1
KAF7199540.1	G4P62_014740	ENSG00000196396	PTPN1
KAF7199541.1	G4P62_014741	ENSG00000117153	KLHL12
KAF7199542.1	G4P62_014741	ENSG00000117153	KLHL12
KAF7199543.1	G4P62_014742	ENSG00000167553	TUBA1C
KAF7199544.1	G4P62_014743	ENSG00000117139	KDM5B
KAF7199545.1	G4P62_014745	ENSG00000159363	ATP13A2
KAF7199546.1	G4P62_014745	ENSG00000159363	ATP13A2
KAF7199547.1	G4P62_014745	ENSG00000159363	ATP13A2
KAF7199548.1	G4P62_014746	ENSG00000205090	TMEM240
KAF7199549.1	G4P62_014746	ENSG00000205090	TMEM240
KAF7199550.1	G4P62_014748	ENSG00000116752	BCAS2
KAF7199551.1	G4P62_014749	ENSG00000197323	TRIM33
KAF7199552.1	G4P62_014749	ENSG00000197323	TRIM33
KAF7199553.1	G4P62_014749	ENSG00000197323	TRIM33
KAF7199554.1	G4P62_014749	ENSG00000197323	TRIM33
KAF7199555.1	G4P62_014750	ENSG00000132792	CTNNBL1
KAF7199556.1	G4P62_014751	ENSG00000132821	VSTM2L
KAF7199557.1	G4P62_014752	ENSG00000101407	TTI1
KAF7199558.1	G4P62_014752	ENSG00000101407	TTI1
KAF7199559.1	G4P62_014752	ENSG00000101407	TTI1
KAF7199560.1	G4P62_014753	ENSG00000197114	ZGPAT
KAF7199561.1	G4P62_014754	ENSG00000101204	CHRNA4
KAF7199562.1	G4P62_016023	ENSG00000092067	CEBPE
KAF7199563.1	G4P62_018935	ENSG00000116748	AMPD1
KAF7199565.1	G4P62_018937	ENSG00000175984	DENND2C
KAF7199566.1	G4P62_018938	ENSG00000237330	RNF223
KAF7199567.1	G4P62_018939	ENSG00000179295	PTPN11
KAF7199568.1	G4P62_002003	ENSG00000141646	SMAD4
KAF7199569.1	G4P62_008459	ENSG00000183495	EP400
KAF7199570.1	G4P62_008459	ENSG00000183495	EP400
KAF7199571.1	G4P62_012275	ENSG00000147465	STAR
KAF7199572.1	G4P62_016375	ENSG00000185585	OLFML2A
KAF7199573.1	G4P62_016376	ENSG00000136935	GOLGA1
KAF7199574.1	G4P62_016376	ENSG00000136935	GOLGA1
KAF7199575.1	G4P62_016376	ENSG00000136935	GOLGA1
KAF7199576.1	G4P62_016377	ENSG00000119414	PPP6C
KAF7199577.1	G4P62_016378	ENSG00000106780	MEGF9
KAF7199578.1	G4P62_016379	ENSG00000226275	LTA
KAF7199579.1	G4P62_016380	ENSG00000148341	SH3GLB2
KAF7199580.1	G4P62_016380	ENSG00000148341	SH3GLB2
KAF7199581.1	G4P62_016380	ENSG00000148341	SH3GLB2
KAF7199582.1	G4P62_016380	ENSG00000148341	SH3GLB2
KAF7199583.1	G4P62_016381	ENSG00000148399	DPH7
KAF7199584.1	G4P62_016381	ENSG00000148399	DPH7
KAF7199585.1	G4P62_016382	ENSG00000182154	MRPL41
KAF7199586.1	G4P62_016383	ENSG00000130653	PNPLA7
KAF7199587.1	G4P62_016387	ENSG00000143119	CD53
KAF7199588.1	G4P62_016388	ENSG00000078061	ARAF
KAF7199589.1	G4P62_016389	ENSG00000136718	IMP4
KAF7199590.1	G4P62_016390	ENSG00000196642	RABL6
KAF7199591.1	G4P62_016390	ENSG00000196642	RABL6
KAF7199592.1	G4P62_016390	ENSG00000196642	RABL6
KAF7199593.1	G4P62_016391	ENSG00000041982	TNC
KAF7199594.1	G4P62_016392	ENSG00000078902	TOLLIP
KAF7199595.1	G4P62_016393	ENSG00000176907	TCIM
KAF7199596.1	G4P62_016394	ENSG00000042980	ADAM28
KAF7199597.1	G4P62_016395	ENSG00000120910	PPP3CC
KAF7199598.1	G4P62_016395	ENSG00000120910	PPP3CC
KAF7199599.1	G4P62_016395	ENSG00000120910	PPP3CC
KAF7199600.1	G4P62_016395	ENSG00000120910	PPP3CC
KAF7199601.1	G4P62_016396	ENSG00000139722	VPS37B
KAF7199602.1	G4P62_016397	ENSG00000150967	ABCB9
KAF7199603.1	G4P62_016397	ENSG00000150967	ABCB9
KAF7199604.1	G4P62_016398	ENSG00000111325	OGFOD2
KAF7199605.1	G4P62_016398	ENSG00000111325	OGFOD2
KAF7199606.1	G4P62_016399	ENSG00000188687	SLC4A5
KAF7199607.1	G4P62_016402	ENSG00000100024	UPB1
KAF7199608.1	G4P62_016403	ENSG00000128271	ADORA2A
KAF7199609.1	G4P62_016404	ENSG00000100014	SPECC1L
KAF7199610.1	G4P62_016404	ENSG00000100014	SPECC1L
KAF7199611.1	G4P62_016405	ENSG00000186716	BCR
KAF7199612.1	G4P62_016405	ENSG00000186716	BCR
KAF7199613.1	G4P62_016406	ENSG00000122970	IFT81
KAF7199614.1	G4P62_016406	ENSG00000122970	IFT81
KAF7199615.1	G4P62_016407	ENSG00000174437	ATP2A2
KAF7199616.1	G4P62_016407	ENSG00000174437	ATP2A2
KAF7199617.1	G4P62_016408	ENSG00000196510	ANAPC7
KAF7199618.1	G4P62_016409	ENSG00000132388	UBE2G1
KAF7199619.1	G4P62_016410	ENSG00000151164	RAD9B
KAF7199620.1	G4P62_016411	ENSG00000186298	PPP1CC
KAF7199621.1	G4P62_016412	ENSG00000111245	MYL2
KAF7199622.1	G4P62_016413	ENSG00000111249	CUX2
KAF7199623.1	G4P62_016413	ENSG00000111249	CUX2
KAF7199624.1	G4P62_016414	ENSG00000100330	MTMR3
KAF7199625.1	G4P62_016414	ENSG00000100330	MTMR3
KAF7199626.1	G4P62_016415	ENSG00000122966	CIT
KAF7199627.1	G4P62_016415	ENSG00000122966	CIT
KAF7199628.1	G4P62_016415	ENSG00000122966	CIT
KAF7199629.1	G4P62_016415	ENSG00000122966	CIT
KAF7199630.1	G4P62_016415	ENSG00000122966	CIT
KAF7199631.1	G4P62_016415	ENSG00000122966	CIT
KAF7199632.1	G4P62_016415	ENSG00000122966	CIT
KAF7199633.1	G4P62_016416	ENSG00000138867	GUCD1
KAF7199634.1	G4P62_016417	ENSG00000171448	ZBTB26
KAF7199635.1	G4P62_016418	ENSG00000106868	SUSD1
KAF7199636.1	G4P62_016418	ENSG00000106868	SUSD1
KAF7199637.1	G4P62_016418	ENSG00000106868	SUSD1
KAF7199638.1	G4P62_016419	ENSG00000157654	PALM2AKAP2
KAF7199639.1	G4P62_016420	ENSG00000267228
KAF7199640.1	G4P62_016421	ENSG00000175387	SMAD2
KAF7199641.1	G4P62_016421	ENSG00000175387	SMAD2
KAF7199642.1	G4P62_016421	ENSG00000175387	SMAD2
KAF7199643.1	G4P62_016421	ENSG00000175387	SMAD2
KAF7199644.1	G4P62_016422	ENSG00000134569	LRP4
KAF7199646.1	G4P62_016424	ENSG00000163743	RCHY1
KAF7199647.1	G4P62_016425	ENSG00000116001	TIA1
KAF7199648.1	G4P62_016425	ENSG00000116001	TIA1
KAF7199649.1	G4P62_016425	ENSG00000116001	TIA1
KAF7199650.1	G4P62_016425	ENSG00000116001	TIA1
KAF7199651.1	G4P62_016426	ENSG00000183779	ZNF703
KAF7199652.1	G4P62_016427	ENSG00000124380	SNRNP27
KAF7199653.1	G4P62_016428	ENSG00000059728	MXD1
KAF7199654.1	G4P62_016429	ENSG00000148798	INA
KAF7199655.1	G4P62_016430	ENSG00000101290	CDS2
KAF7199656.1	G4P62_016431	ENSG00000163219	ARHGAP25
KAF7199657.1	G4P62_016431	ENSG00000163219	ARHGAP25
KAF7199658.1	G4P62_016432	ENSG00000163217	BMP10
KAF7199659.1	G4P62_016433	ENSG00000138135	CH25H
KAF7199660.1	G4P62_016434	ENSG00000147475	ERLIN2
KAF7199661.1	G4P62_016435	ENSG00000075340	ADD2
KAF7199662.1	G4P62_016435	ENSG00000075340	ADD2
KAF7199663.1	G4P62_016435	ENSG00000075340	ADD2
KAF7199664.1	G4P62_016435	ENSG00000075340	ADD2
KAF7199665.1	G4P62_016435	ENSG00000075340	ADD2
KAF7199666.1	G4P62_016435	ENSG00000075340	ADD2
KAF7199667.1	G4P62_016435	ENSG00000075340	ADD2
KAF7199668.1	G4P62_016435	ENSG00000075340	ADD2
KAF7199669.1	G4P62_016435	ENSG00000075340	ADD2
KAF7199670.1	G4P62_016435	ENSG00000075340	ADD2
KAF7199671.1	G4P62_016435	ENSG00000075340	ADD2
KAF7199672.1	G4P62_016435	ENSG00000075340	ADD2
KAF7199673.1	G4P62_016435	ENSG00000075340	ADD2
KAF7199674.1	G4P62_016435	ENSG00000075340	ADD2
KAF7199675.1	G4P62_016436	ENSG00000183733	FIGLA
KAF7199676.1	G4P62_016436	ENSG00000183733	FIGLA
KAF7199677.1	G4P62_016437	ENSG00000159399	HK2
KAF7199678.1	G4P62_016438	ENSG00000187605	TET3
KAF7199679.1	G4P62_016438	ENSG00000187605	TET3
KAF7199680.1	G4P62_016438	ENSG00000187605	TET3
KAF7199681.1	G4P62_016439	ENSG00000070718	AP3M2
KAF7199682.1	G4P62_016439	ENSG00000070718	AP3M2
KAF7199683.1	G4P62_016440	ENSG00000083168	KAT6A
KAF7199684.1	G4P62_016440	ENSG00000083168	KAT6A
KAF7199685.1	G4P62_016440	ENSG00000083168	KAT6A
KAF7199686.1	G4P62_016441	ENSG00000184661	CDCA2
KAF7199687.1	G4P62_016441	ENSG00000184661	CDCA2
KAF7199688.1	G4P62_016442	ENSG00000168758	SEMA4C
KAF7199689.1	G4P62_016443	ENSG00000184058	TBX1
KAF7199690.1	G4P62_016444	ENSG00000185838	GNB1L
KAF7199691.1	G4P62_016445	ENSG00000099889	ARVCF
KAF7199692.1	G4P62_016445	ENSG00000099889	ARVCF
KAF7199693.1	G4P62_016445	ENSG00000099889	ARVCF
KAF7199694.1	G4P62_016445	ENSG00000099889	ARVCF
KAF7199695.1	G4P62_016446	ENSG00000183597	TANGO2
KAF7199696.1	G4P62_016446	ENSG00000183597	TANGO2
KAF7199697.1	G4P62_016446	ENSG00000183597	TANGO2
KAF7199698.1	G4P62_016447	ENSG00000128191	DGCR8
KAF7199699.1	G4P62_016448	ENSG00000099899	TRMT2A
KAF7199700.1	G4P62_016449	ENSG00000099901	RANBP1
KAF7199701.1	G4P62_016450	ENSG00000099904	ZDHHC8
KAF7199702.1	G4P62_016451	ENSG00000247077	PGAM5
KAF7199703.1	G4P62_016451	ENSG00000247077	PGAM5
KAF7199704.1	G4P62_016452	ENSG00000176915	ANKLE2
KAF7199705.1	G4P62_016452	ENSG00000176915	ANKLE2
KAF7199706.1	G4P62_016453	ENSG00000090615	GOLGA3
KAF7199707.1	G4P62_016453	ENSG00000090615	GOLGA3
KAF7199708.1	G4P62_016453	ENSG00000090615	GOLGA3
KAF7199709.1	G4P62_016453	ENSG00000090615	GOLGA3
KAF7199710.1	G4P62_016454	ENSG00000121904	CSMD2
KAF7199711.1	G4P62_016455	ENSG00000072609	CHFR
KAF7199712.1	G4P62_016455	ENSG00000072609	CHFR
KAF7199713.1	G4P62_016456	ENSG00000158321	AUTS2
KAF7199714.1	G4P62_016457	ENSG00000288490	GALNT9
KAF7199715.1	G4P62_016457	ENSG00000288490	GALNT9
KAF7199716.1	G4P62_016458	ENSG00000138138	ATAD1
KAF7199717.1	G4P62_016459	ENSG00000148680	HTR7
KAF7199718.1	G4P62_016460	ENSG00000197181	PIWIL2
KAF7199719.1	G4P62_016460	ENSG00000197181	PIWIL2
KAF7199720.1	G4P62_016460	ENSG00000197181	PIWIL2
KAF7199721.1	G4P62_016461	ENSG00000173273	TNKS
KAF7199722.1	G4P62_016461	ENSG00000173273	TNKS
KAF7199723.1	G4P62_016462	ENSG00000127415	IDUA
KAF7199724.1	G4P62_016462	ENSG00000127415	IDUA
KAF7199725.1	G4P62_016462	ENSG00000127415	IDUA
KAF7199726.1	G4P62_016463	ENSG00000168263	KCNV2
KAF7199727.1	G4P62_016464	ENSG00000168890	TMEM150A
KAF7199728.1	G4P62_016464	ENSG00000168890	TMEM150A
KAF7199729.1	G4P62_016465	ENSG00000168894	RNF181
KAF7199730.1	G4P62_016465	ENSG00000168894	RNF181
KAF7199731.1	G4P62_016466	ENSG00000089159	PXN
KAF7199732.1	G4P62_016466	ENSG00000089159	PXN
KAF7199733.1	G4P62_016466	ENSG00000089159	PXN
KAF7199734.1	G4P62_016466	ENSG00000089159	PXN
KAF7199735.1	G4P62_016466	ENSG00000089159	PXN
KAF7199736.1	G4P62_016467	ENSG00000142544	CTU1
KAF7199737.1	G4P62_016467	ENSG00000142544	CTU1
KAF7199738.1	G4P62_016468	ENSG00000244752	CRYBB2
KAF7199739.1	G4P62_016469	ENSG00000100053	CRYBB3
KAF7199740.1	G4P62_016470	ENSG00000197077	KIAA1671
KAF7199741.1	G4P62_016470	ENSG00000197077	KIAA1671
KAF7199742.1	G4P62_016471	ENSG00000022840	RNF10
KAF7199743.1	G4P62_016472	ENSG00000167272	POP5
KAF7199744.1	G4P62_016473	ENSG00000175970	UNC119B
KAF7199745.1	G4P62_016474	ENSG00000157895	C12orf43
KAF7199746.1	G4P62_016475	ENSG00000135100	HNF1A
KAF7199747.1	G4P62_016476	ENSG00000135097	MSI1
KAF7199748.1	G4P62_016477	ENSG00000111725	PRKAB1
KAF7199749.1	G4P62_016478	ENSG00000170890	PLA2G1B
KAF7199750.1	G4P62_016478	ENSG00000170890	PLA2G1B
KAF7199751.1	G4P62_016479	ENSG00000111775	COX6A1
KAF7199752.1	G4P62_016480	ENSG00000170903	MSANTD4
KAF7199753.1	G4P62_016480	ENSG00000170903	MSANTD4
KAF7199754.1	G4P62_016481	ENSG00000100099	HPS4
KAF7199755.1	G4P62_016481	ENSG00000100099	HPS4
KAF7199756.1	G4P62_016482	ENSG00000110917	MLEC
KAF7199757.1	G4P62_016482	ENSG00000110917	MLEC
KAF7199758.1	G4P62_016483	ENSG00000157782	CABP1
KAF7199759.1	G4P62_016483	ENSG00000157782	CABP1
KAF7199760.1	G4P62_016483	ENSG00000157782	CABP1
KAF7199761.1	G4P62_016484	ENSG00000128203	ASPHD2
KAF7199762.1	G4P62_016484	ENSG00000128203	ASPHD2
KAF7199763.1	G4P62_016484	ENSG00000128203	ASPHD2
KAF7199764.1	G4P62_016484	ENSG00000128203	ASPHD2
KAF7199765.1	G4P62_016484	ENSG00000128203	ASPHD2
KAF7199766.1	G4P62_016485	ENSG00000099998	GGT5
KAF7199767.1	G4P62_016486	ENSG00000099998	GGT5
KAF7199768.1	G4P62_016487	ENSG00000181350	LRRC75A
KAF7199769.1	G4P62_016488	ENSG00000100031	GGT1
KAF7199770.1	G4P62_016489	ENSG00000089053	ANAPC5
KAF7199771.1	G4P62_016491	ENSG00000176204	LRRTM4
KAF7199772.1	G4P62_016492	ENSG00000176204	LRRTM4
KAF7199773.1	G4P62_016493	ENSG00000154639	CXADR
KAF7199774.1	G4P62_016493	ENSG00000154639	CXADR
KAF7199776.1	G4P62_016495	ENSG00000147459	DOCK5
KAF7199777.1	G4P62_016496	ENSG00000277586	NEFL
KAF7199778.1	G4P62_016497	ENSG00000099991	CABIN1
KAF7199779.1	G4P62_016497	ENSG00000099991	CABIN1
KAF7199780.1	G4P62_016497	ENSG00000099991	CABIN1
KAF7199781.1	G4P62_016498	ENSG00000099910	KLHL22
KAF7199782.1	G4P62_016498	ENSG00000099910	KLHL22
KAF7199783.1	G4P62_016498	ENSG00000099910	KLHL22
KAF7199784.1	G4P62_016499	ENSG00000164128	NPY1R
KAF7199785.1	G4P62_016500	ENSG00000147437	GNRH1
KAF7199786.1	G4P62_016501	ENSG00000104756	KCTD9
KAF7199787.1	G4P62_016501	ENSG00000104756	KCTD9
KAF7199788.1	G4P62_016501	ENSG00000104756	KCTD9
KAF7199789.1	G4P62_016502	ENSG00000213337	ANKRD39
KAF7199790.1	G4P62_016502	ENSG00000213337	ANKRD39
KAF7199791.1	G4P62_016502	ENSG00000213337	ANKRD39
KAF7199792.1	G4P62_016503	ENSG00000077782	FGFR1
KAF7199793.1	G4P62_016503	ENSG00000077782	FGFR1
KAF7199794.1	G4P62_016503	ENSG00000077782	FGFR1
KAF7199795.1	G4P62_016503	ENSG00000077782	FGFR1
KAF7199796.1	G4P62_016504	ENSG00000168481	LGI3
KAF7199797.1	G4P62_016505	ENSG00000147457	CHMP7
KAF7199798.1	G4P62_016506	ENSG00000275035	CCDC92
KAF7199799.1	G4P62_016506	ENSG00000275035	CCDC92
KAF7199800.1	G4P62_016507	ENSG00000178882	RFLNA
KAF7199801.1	G4P62_016508	ENSG00000196498	NCOR2
KAF7199802.1	G4P62_016508	ENSG00000196498	NCOR2
KAF7199803.1	G4P62_016508	ENSG00000196498	NCOR2
KAF7199804.1	G4P62_016508	ENSG00000196498	NCOR2
KAF7199805.1	G4P62_016509	ENSG00000183495	EP400
KAF7199806.1	G4P62_016509	ENSG00000183495	EP400
KAF7199807.1	G4P62_016509	ENSG00000183495	EP400
KAF7199808.1	G4P62_016514	ENSG00000111452	ADGRD1
KAF7199809.1	G4P62_016514	ENSG00000111452	ADGRD1
KAF7199810.1	G4P62_016515	ENSG00000111450	STX2
KAF7199811.1	G4P62_016515	ENSG00000111450	STX2
KAF7199812.1	G4P62_016516	ENSG00000060709	RIMBP2
KAF7199813.1	G4P62_016516	ENSG00000060709	RIMBP2
KAF7199814.1	G4P62_016516	ENSG00000060709	RIMBP2
KAF7199815.1	G4P62_016516	ENSG00000060709	RIMBP2
KAF7199816.1	G4P62_016516	ENSG00000060709	RIMBP2
KAF7199817.1	G4P62_016516	ENSG00000060709	RIMBP2
KAF7199818.1	G4P62_016517	ENSG00000275051	PIWIL1
KAF7199819.1	G4P62_016517	ENSG00000275051	PIWIL1
KAF7199820.1	G4P62_016518	ENSG00000111432	FZD10
KAF7199821.1	G4P62_016519	ENSG00000181234	TMEM132C
KAF7199822.1	G4P62_016520	ENSG00000181234	TMEM132C
KAF7199823.1	G4P62_016521	ENSG00000151948	GLT1D1
KAF7199824.1	G4P62_016522	ENSG00000139370	SLC15A4
KAF7199825.1	G4P62_016523	ENSG00000181234	TMEM132C
KAF7199826.1	G4P62_016524	ENSG00000181234	TMEM132C
KAF7199827.1	G4P62_016525	ENSG00000095321	CRAT
KAF7199828.1	G4P62_016526	ENSG00000281244	ADAMTS13
KAF7199829.1	G4P62_016526	ENSG00000281244	ADAMTS13
KAF7199830.1	G4P62_016527	ENSG00000107130	NCS1
KAF7199831.1	G4P62_016527	ENSG00000107130	NCS1
KAF7199832.1	G4P62_016528	ENSG00000143341	HMCN1
KAF7199833.1	G4P62_016529	ENSG00000136859	ANGPTL2
KAF7199834.1	G4P62_016530	ENSG00000177125	ZBTB34
KAF7199835.1	G4P62_016530	ENSG00000177125	ZBTB34
KAF7199836.1	G4P62_016531	ENSG00000136944	LMX1B
KAF7199837.1	G4P62_016531	ENSG00000136944	LMX1B
KAF7199838.1	G4P62_016531	ENSG00000136944	LMX1B
KAF7199839.1	G4P62_016532	ENSG00000196814	MVB12B
KAF7199840.1	G4P62_016532	ENSG00000196814	MVB12B
KAF7199841.1	G4P62_016532	ENSG00000196814	MVB12B
KAF7199842.1	G4P62_016532	ENSG00000196814	MVB12B
KAF7199843.1	G4P62_016533	ENSG00000167081	PBX3
KAF7199844.1	G4P62_016533	ENSG00000167081	PBX3
KAF7199845.1	G4P62_016533	ENSG00000167081	PBX3
KAF7199846.1	G4P62_016533	ENSG00000167081	PBX3
KAF7199847.1	G4P62_016533	ENSG00000167081	PBX3
KAF7199848.1	G4P62_016533	ENSG00000167081	PBX3
KAF7199849.1	G4P62_016533	ENSG00000167081	PBX3
KAF7199850.1	G4P62_016533	ENSG00000167081	PBX3
KAF7199851.1	G4P62_016534	ENSG00000165219	GAPVD1
KAF7199852.1	G4P62_016534	ENSG00000165219	GAPVD1
KAF7199853.1	G4P62_016534	ENSG00000165219	GAPVD1
KAF7199854.1	G4P62_016534	ENSG00000165219	GAPVD1
KAF7199855.1	G4P62_016534	ENSG00000165219	GAPVD1
KAF7199856.1	G4P62_016534	ENSG00000165219	GAPVD1
KAF7199857.1	G4P62_016534	ENSG00000165219	GAPVD1
KAF7199858.1	G4P62_016534	ENSG00000165219	GAPVD1
KAF7199859.1	G4P62_016534	ENSG00000165219	GAPVD1
KAF7199860.1	G4P62_016535	ENSG00000232434	AJM1
KAF7199861.1	G4P62_016536	ENSG00000008056	SYN1
KAF7199862.1	G4P62_016536	ENSG00000008056	SYN1
KAF7199863.1	G4P62_016537	ENSG00000144560	VGLL4
KAF7199864.1	G4P62_016538	ENSG00000144136	SLC20A1
KAF7199865.1	G4P62_016539	ENSG00000110042	DTX4
KAF7199866.1	G4P62_016539	ENSG00000110042	DTX4
KAF7199867.1	G4P62_016539	ENSG00000110042	DTX4
KAF7199868.1	G4P62_016539	ENSG00000110042	DTX4
KAF7199869.1	G4P62_016539	ENSG00000110042	DTX4
KAF7199870.1	G4P62_016540	ENSG00000111344	RASAL1
KAF7199871.1	G4P62_016540	ENSG00000111344	RASAL1
KAF7199872.1	G4P62_016540	ENSG00000111344	RASAL1
KAF7199873.1	G4P62_016540	ENSG00000111344	RASAL1
KAF7199874.1	G4P62_016540	ENSG00000111344	RASAL1
KAF7199875.1	G4P62_016540	ENSG00000111344	RASAL1
KAF7199876.1	G4P62_016541	ENSG00000278817
KAF7199877.1	G4P62_016542	ENSG00000099960	SLC7A4
KAF7199878.1	G4P62_016543	ENSG00000187860	CCDC157
KAF7199879.1	G4P62_016543	ENSG00000187860	CCDC157
KAF7199880.1	G4P62_016544	ENSG00000099995	SF3A1
KAF7199881.1	G4P62_016545	ENSG00000099992	TBC1D10A
KAF7199882.1	G4P62_016546	ENSG00000134817	APLNR
KAF7199883.1	G4P62_016547	ENSG00000158104	HPD
KAF7199884.1	G4P62_016548	ENSG00000139718	SETD1B
KAF7199885.1	G4P62_016549	ENSG00000139718	SETD1B
KAF7199886.1	G4P62_016550	ENSG00000276045	ORAI1
KAF7199887.1	G4P62_016551	ENSG00000089094	KDM2B
KAF7199888.1	G4P62_016551	ENSG00000089094	KDM2B
KAF7199889.1	G4P62_016551	ENSG00000089094	KDM2B
KAF7199890.1	G4P62_016552	ENSG00000170633	RNF34
KAF7199891.1	G4P62_016552	ENSG00000170633	RNF34
KAF7199892.1	G4P62_016553	ENSG00000172244	C5orf34
KAF7199893.1	G4P62_016554	ENSG00000164327	RICTOR
KAF7199894.1	G4P62_016554	ENSG00000164327	RICTOR
KAF7199895.1	G4P62_016555	ENSG00000015520	NPC1L1
KAF7199896.1	G4P62_016556	ENSG00000147140	NONO
KAF7199897.1	G4P62_016557	ENSG00000106628	POLD2
KAF7199898.1	G4P62_016557	ENSG00000106628	POLD2
KAF7199899.1	G4P62_016558	ENSG00000106624	AEBP1
KAF7199900.1	G4P62_016558	ENSG00000106624	AEBP1
KAF7199901.1	G4P62_016559	ENSG00000115459	ELMOD3
KAF7199902.1	G4P62_016559	ENSG00000115459	ELMOD3
KAF7199903.1	G4P62_016560	ENSG00000198873	GRK5
KAF7199904.1	G4P62_016561	ENSG00000175324	LSM1
KAF7199905.1	G4P62_016562	ENSG00000156735	BAG4
KAF7199906.1	G4P62_016562	ENSG00000156735	BAG4
KAF7199907.1	G4P62_016563	ENSG00000133878	DUSP26
KAF7199908.1	G4P62_016567	ENSG00000119121	TRPM6
KAF7199909.1	G4P62_016567	ENSG00000119121	TRPM6
KAF7199910.1	G4P62_016568	ENSG00000198963	RORB
KAF7199911.1	G4P62_016569	ENSG00000167700	MFSD3
KAF7199912.1	G4P62_016569	ENSG00000167700	MFSD3
KAF7199913.1	G4P62_016570	ENSG00000135046	ANXA1
KAF7199914.1	G4P62_016571	ENSG00000140859	KIFC3
KAF7199915.1	G4P62_016571	ENSG00000140859	KIFC3
KAF7199916.1	G4P62_016572	ENSG00000140465	CYP1A1
KAF7199917.1	G4P62_016573	ENSG00000149488	TMC2
KAF7199918.1	G4P62_016574	ENSG00000107372	ZFAND5
KAF7199919.1	G4P62_016575	ENSG00000144028	SNRNP200
KAF7199920.1	G4P62_016576	ENSG00000144021	CIAO1
KAF7199921.1	G4P62_016577	ENSG00000135956	TMEM127
KAF7199922.1	G4P62_016578	ENSG00000280071	GATD3B
KAF7199923.1	G4P62_016579	ENSG00000085552	IGSF9
KAF7199924.1	G4P62_016579	ENSG00000085552	IGSF9
KAF7199925.1	G4P62_016579	ENSG00000085552	IGSF9
KAF7199926.1	G4P62_016580	ENSG00000089063	TMEM230
KAF7199927.1	G4P62_016581	ENSG00000120907	ADRA1A
KAF7199928.1	G4P62_016582	ENSG00000092964	DPYSL2
KAF7199929.1	G4P62_016583	ENSG00000104765	BNIP3L
KAF7199930.1	G4P62_016584	ENSG00000221914	PPP2R2A
KAF7199931.1	G4P62_016585	ENSG00000139719	VPS33A
KAF7199932.1	G4P62_016586	ENSG00000089169	RPH3A
KAF7199933.1	G4P62_016586	ENSG00000089169	RPH3A
KAF7199934.1	G4P62_016587	ENSG00000100078	PLA2G3
KAF7199935.1	G4P62_016587	ENSG00000100078	PLA2G3
KAF7199936.1	G4P62_016588	ENSG00000173064	HECTD4
KAF7199937.1	G4P62_016588	ENSG00000173064	HECTD4
KAF7199938.1	G4P62_016589	ENSG00000100154	TTC28
KAF7199939.1	G4P62_016590	ENSG00000100154	TTC28
KAF7199940.1	G4P62_016590	ENSG00000100154	TTC28
KAF7199941.1	G4P62_016591	ENSG00000169184	MN1
KAF7199942.1	G4P62_016592	ENSG00000167065	DUSP18
KAF7199943.1	G4P62_016593	ENSG00000152291	TGOLN2
KAF7199944.1	G4P62_016594	ENSG00000152284	TCF7L1
KAF7199945.1	G4P62_016594	ENSG00000152284	TCF7L1
KAF7199946.1	G4P62_016594	ENSG00000152284	TCF7L1
KAF7199947.1	G4P62_016594	ENSG00000152284	TCF7L1
KAF7199948.1	G4P62_016595	ENSG00000078967	UBE2D4
KAF7199949.1	G4P62_016596	ENSG00000136279	DBNL
KAF7199950.1	G4P62_016596	ENSG00000136279	DBNL
KAF7199951.1	G4P62_016596	ENSG00000136279	DBNL
KAF7199952.1	G4P62_016596	ENSG00000136279	DBNL
KAF7199953.1	G4P62_016596	ENSG00000136279	DBNL
KAF7199954.1	G4P62_016597	ENSG00000196843	ARID5A
KAF7199955.1	G4P62_016598	ENSG00000147536	GINS4
KAF7199956.1	G4P62_016599	ENSG00000119938	PPP1R3C
KAF7199957.1	G4P62_016599	ENSG00000119938	PPP1R3C
KAF7199958.1	G4P62_016599	ENSG00000119938	PPP1R3C
KAF7199959.1	G4P62_016599	ENSG00000119938	PPP1R3C
KAF7199960.1	G4P62_016600	ENSG00000168490	PHYHIP
KAF7199961.1	G4P62_016600	ENSG00000168490	PHYHIP
KAF7199962.1	G4P62_016600	ENSG00000168490	PHYHIP
KAF7199963.1	G4P62_016601	ENSG00000168495	POLR3D
KAF7199964.1	G4P62_016602	ENSG00000158669	GPAT4
KAF7199965.1	G4P62_016602	ENSG00000158669	GPAT4
KAF7199966.1	G4P62_016603	ENSG00000068383	INPP5A
KAF7199967.1	G4P62_016604	ENSG00000165066	NKX6-3
KAF7199968.1	G4P62_016605	ENSG00000163121	NEURL3
KAF7199969.1	G4P62_016606	ENSG00000120896	SORBS3
KAF7199970.1	G4P62_016606	ENSG00000120896	SORBS3
KAF7199971.1	G4P62_016606	ENSG00000120896	SORBS3
KAF7199972.1	G4P62_016606	ENSG00000120896	SORBS3
KAF7199973.1	G4P62_016606	ENSG00000120896	SORBS3
KAF7199974.1	G4P62_016606	ENSG00000120896	SORBS3
KAF7199975.1	G4P62_016606	ENSG00000120896	SORBS3
KAF7199976.1	G4P62_016606	ENSG00000120896	SORBS3
KAF7199977.1	G4P62_016606	ENSG00000120896	SORBS3
KAF7199978.1	G4P62_016606	ENSG00000120896	SORBS3
KAF7199979.1	G4P62_016606	ENSG00000120896	SORBS3
KAF7199980.1	G4P62_016606	ENSG00000120896	SORBS3
KAF7199981.1	G4P62_016607	ENSG00000120913	PDLIM2
KAF7199982.1	G4P62_016608	ENSG00000020181	ADGRA2
KAF7199983.1	G4P62_016609	ENSG00000156675	RAB11FIP1
KAF7199984.1	G4P62_016609	ENSG00000156675	RAB11FIP1
KAF7199985.1	G4P62_016609	ENSG00000156675	RAB11FIP1
KAF7199986.1	G4P62_016609	ENSG00000156675	RAB11FIP1
KAF7199987.1	G4P62_016610	ENSG00000119973	PRLHR
KAF7199988.1	G4P62_016611	ENSG00000043591	ADRB1
KAF7199989.1	G4P62_016612	ENSG00000115977	AAK1
KAF7199990.1	G4P62_016612	ENSG00000115977	AAK1
KAF7199991.1	G4P62_016612	ENSG00000115977	AAK1
KAF7199992.1	G4P62_016612	ENSG00000115977	AAK1
KAF7199993.1	G4P62_016612	ENSG00000115977	AAK1
KAF7199994.1	G4P62_016613	ENSG00000281022	MED22
KAF7199995.1	G4P62_016613	ENSG00000281022	MED22
KAF7199996.1	G4P62_016614	ENSG00000136819	C9orf78
KAF7199997.1	G4P62_016615	ENSG00000169599	NFU1
KAF7199998.1	G4P62_016616	ENSG00000198380	GFPT1
KAF7199999.1	G4P62_016617	ENSG00000169604	ANTXR1
KAF7200000.1	G4P62_016618	ENSG00000263639	MSMB
KAF7200001.1	G4P62_016619	ENSG00000114982	KANSL3
KAF7200002.1	G4P62_016619	ENSG00000114982	KANSL3
KAF7200003.1	G4P62_016619	ENSG00000114982	KANSL3
KAF7200004.1	G4P62_016619	ENSG00000114982	KANSL3
KAF7200005.1	G4P62_016619	ENSG00000114982	KANSL3
KAF7200006.1	G4P62_016620	ENSG00000168487	BMP1
KAF7200007.1	G4P62_016621	ENSG00000204624	DISP3
KAF7200008.1	G4P62_016621	ENSG00000204624	DISP3
KAF7200009.1	G4P62_016621	ENSG00000204624	DISP3
KAF7200010.1	G4P62_016621	ENSG00000204624	DISP3
KAF7200011.1	G4P62_016621	ENSG00000204624	DISP3
KAF7200012.1	G4P62_016622	ENSG00000087470	DNM1L
KAF7200013.1	G4P62_016622	ENSG00000087470	DNM1L
KAF7200014.1	G4P62_016626	ENSG00000179388	EGR3
KAF7200015.1	G4P62_016626	ENSG00000179388	EGR3
KAF7200016.1	G4P62_016627	ENSG00000134020	PEBP4
KAF7200017.1	G4P62_016628	ENSG00000008853	RHOBTB2
KAF7200018.1	G4P62_016628	ENSG00000008853	RHOBTB2
KAF7200019.1	G4P62_016628	ENSG00000008853	RHOBTB2
KAF7200020.1	G4P62_016629	ENSG00000188676	IDO2
KAF7200021.1	G4P62_016630	ENSG00000159167	STC1
KAF7200022.1	G4P62_016630	ENSG00000159167	STC1
KAF7200023.1	G4P62_016635	ENSG00000180053	NKX2-6
KAF7200024.1	G4P62_016636	ENSG00000167034	NKX3-1
KAF7200025.1	G4P62_016637	ENSG00000147454	SLC25A37
KAF7200026.1	G4P62_016638	ENSG00000197217	ENTPD4
KAF7200027.1	G4P62_016638	ENSG00000197217	ENTPD4
KAF7200032.1	G4P62_016640	ENSG00000119125	GDA
KAF7200033.1	G4P62_016641	ENSG00000155621	C9orf85
KAF7200034.1	G4P62_016642	ENSG00000107362	ABHD17B
KAF7200035.1	G4P62_016643	ENSG00000135048	CEMIP2
KAF7200036.1	G4P62_016644	ENSG00000083067	TRPM3
KAF7200037.1	G4P62_016644	ENSG00000083067	TRPM3
KAF7200038.1	G4P62_016644	ENSG00000083067	TRPM3
KAF7200039.1	G4P62_016645	ENSG00000119138	KLF9
KAF7200040.1	G4P62_016646	ENSG00000164970	FAM219A
KAF7200042.1	G4P62_016648	ENSG00000168546	GFRA2
KAF7200043.1	G4P62_016649	ENSG00000061337	LZTS1
KAF7200044.1	G4P62_016649	ENSG00000061337	LZTS1
KAF7200045.1	G4P62_016650	ENSG00000081870	HSPB11
KAF7200046.1	G4P62_016651	ENSG00000273772	SMN2
KAF7200047.1	G4P62_016652	ENSG00000114993	RTKN
KAF7200048.1	G4P62_016652	ENSG00000114993	RTKN
KAF7200049.1	G4P62_016652	ENSG00000114993	RTKN
KAF7200050.1	G4P62_016652	ENSG00000114993	RTKN
KAF7200051.1	G4P62_016653	ENSG00000176055	MBLAC2
KAF7200052.1	G4P62_016654	ENSG00000113356	POLR3G
KAF7200053.1	G4P62_016655	ENSG00000176018	LYSMD3
KAF7200054.1	G4P62_016655	ENSG00000176018	LYSMD3
KAF7200055.1	G4P62_016656	ENSG00000164199	ADGRV1
KAF7200056.1	G4P62_016657	ENSG00000113369	ARRDC3
KAF7200057.1	G4P62_016658	ENSG00000164291	ARSK
KAF7200058.1	G4P62_016659	ENSG00000198677	TTC37
KAF7200059.1	G4P62_016659	ENSG00000198677	TTC37
KAF7200061.1	G4P62_016661	ENSG00000175471	MCTP1
KAF7200062.1	G4P62_016661	ENSG00000175471	MCTP1
KAF7200063.1	G4P62_016661	ENSG00000175471	MCTP1
KAF7200064.1	G4P62_016662	ENSG00000133302	SLF1
KAF7200065.1	G4P62_016662	ENSG00000133302	SLF1
KAF7200066.1	G4P62_016663	ENSG00000185261	KIAA0825
KAF7200067.1	G4P62_016663	ENSG00000185261	KIAA0825
KAF7200068.1	G4P62_016664	ENSG00000113391	FAM172A
KAF7200069.1	G4P62_016664	ENSG00000113391	FAM172A
KAF7200070.1	G4P62_016665	ENSG00000158406	H4C8
KAF7200071.1	G4P62_016666	ENSG00000175745	NR2F1
KAF7200072.1	G4P62_016668	ENSG00000113369	ARRDC3
KAF7200073.1	G4P62_016669	ENSG00000113369	ARRDC3
KAF7200075.1	G4P62_016671	ENSG00000165272	AQP3
KAF7200076.1	G4P62_016672	ENSG00000165271	NOL6
KAF7200077.1	G4P62_016672	ENSG00000165271	NOL6
KAF7200078.1	G4P62_016673	ENSG00000214717	ZBED1
KAF7200080.1	G4P62_016675	ENSG00000284308	C2orf81
KAF7200081.1	G4P62_016676	ENSG00000005448	WDR54
KAF7200082.1	G4P62_016676	ENSG00000005448	WDR54
KAF7200083.1	G4P62_016677	ENSG00000008853	RHOBTB2
KAF7200084.1	G4P62_016677	ENSG00000008853	RHOBTB2
KAF7200085.1	G4P62_016678	ENSG00000113758	DBN1
KAF7200086.1	G4P62_016678	ENSG00000113758	DBN1
KAF7200087.1	G4P62_016678	ENSG00000113758	DBN1
KAF7200088.1	G4P62_016678	ENSG00000113758	DBN1
KAF7200089.1	G4P62_016680	ENSG00000081189	MEF2C
KAF7200090.1	G4P62_016681	ENSG00000164180	TMEM161B
KAF7200091.1	G4P62_016681	ENSG00000164180	TMEM161B
KAF7200092.1	G4P62_016682	ENSG00000134480	CCNH
KAF7200093.1	G4P62_016683	ENSG00000145715	RASA1
KAF7200094.1	G4P62_016684	ENSG00000127184	COX7C
KAF7200095.1	G4P62_016685	ENSG00000164176	EDIL3
KAF7200097.1	G4P62_016687	ENSG00000038427	VCAN
KAF7200098.1	G4P62_016688	ENSG00000152422	XRCC4
KAF7200099.1	G4P62_016689	ENSG00000174695	TMEM167A
KAF7200100.1	G4P62_016690	ENSG00000113369	ARRDC3
KAF7200101.1	G4P62_016691	ENSG00000113369	ARRDC3
KAF7200102.1	G4P62_016692	ENSG00000113369	ARRDC3
KAF7200103.1	G4P62_016693	ENSG00000145687	SSBP2
KAF7200104.1	G4P62_016693	ENSG00000145687	SSBP2
KAF7200105.1	G4P62_016693	ENSG00000145687	SSBP2
KAF7200106.1	G4P62_016693	ENSG00000145687	SSBP2
KAF7200108.1	G4P62_016695	ENSG00000229314	ORM1
KAF7200109.1	G4P62_016696	ENSG00000181104	F2R
KAF7200110.1	G4P62_016697	ENSG00000140575	IQGAP1
KAF7200111.1	G4P62_016698	ENSG00000164220	F2RL2
KAF7200112.1	G4P62_016699	ENSG00000122012	SV2C
KAF7200113.1	G4P62_016700	ENSG00000152359	POC5
KAF7200114.1	G4P62_016701	ENSG00000189045	ANKDD1B
KAF7200115.1	G4P62_016702	ENSG00000122008	POLK
KAF7200116.1	G4P62_016703	ENSG00000113163	CERT1
KAF7200117.1	G4P62_016703	ENSG00000113163	CERT1
KAF7200118.1	G4P62_016703	ENSG00000113163	CERT1
KAF7200119.1	G4P62_016703	ENSG00000113163	CERT1
KAF7200120.1	G4P62_016703	ENSG00000113163	CERT1
KAF7200121.1	G4P62_016703	ENSG00000113163	CERT1
KAF7200122.1	G4P62_016703	ENSG00000113163	CERT1
KAF7200123.1	G4P62_016704	ENSG00000107242	PIP5K1B
KAF7200124.1	G4P62_016704	ENSG00000107242	PIP5K1B
KAF7200125.1	G4P62_016705	ENSG00000141161	UNC45B
KAF7200126.1	G4P62_016706	ENSG00000068796	KIF2A
KAF7200127.1	G4P62_016706	ENSG00000068796	KIF2A
KAF7200128.1	G4P62_016707	ENSG00000086189	DIMT1
KAF7200129.1	G4P62_016708	ENSG00000153044	CENPH
KAF7200130.1	G4P62_016708	ENSG00000153044	CENPH
KAF7200131.1	G4P62_016709	ENSG00000152409	JMY
KAF7200132.1	G4P62_016709	ENSG00000152409	JMY
KAF7200133.1	G4P62_016710	ENSG00000152413	HOMER1
KAF7200134.1	G4P62_016710	ENSG00000152413	HOMER1
KAF7200135.1	G4P62_016710	ENSG00000152413	HOMER1
KAF7200136.1	G4P62_016710	ENSG00000152413	HOMER1
KAF7200137.1	G4P62_016711	ENSG00000164329	TENT2
KAF7200138.1	G4P62_016711	ENSG00000164329	TENT2
KAF7200139.1	G4P62_016712	ENSG00000164309	CMYA5
KAF7200140.1	G4P62_016713	ENSG00000177034	MTX3
KAF7200141.1	G4P62_016713	ENSG00000177034	MTX3
KAF7200142.1	G4P62_016714	ENSG00000113296	THBS4
KAF7200143.1	G4P62_016715	ENSG00000164300	SERINC5
KAF7200144.1	G4P62_016716	ENSG00000277273	CDK7
KAF7200145.1	G4P62_016716	ENSG00000277273	CDK7
KAF7200146.1	G4P62_016717	ENSG00000152217	SETBP1
KAF7200147.1	G4P62_016718	ENSG00000132874	SLC14A2
KAF7200148.1	G4P62_016719	ENSG00000113441	LNPEP
KAF7200149.1	G4P62_016720	ENSG00000254737	OR10G4
KAF7200150.1	G4P62_016721	ENSG00000174136	RGMB
KAF7200151.1	G4P62_016722	ENSG00000058729	RIOK2
KAF7200152.1	G4P62_016723	ENSG00000145721	LIX1
KAF7200153.1	G4P62_016724	ENSG00000152223	EPG5
KAF7200154.1	G4P62_016725	ENSG00000137094	DNAJB5
KAF7200155.1	G4P62_016725	ENSG00000137094	DNAJB5
KAF7200156.1	G4P62_016726	ENSG00000117448	AKR1A1
KAF7200157.1	G4P62_016726	ENSG00000117448	AKR1A1
KAF7200158.1	G4P62_016727	ENSG00000165280	VCP
KAF7200159.1	G4P62_016728	ENSG00000221829	FANCG
KAF7200160.1	G4P62_016728	ENSG00000221829	FANCG
KAF7200161.1	G4P62_016729	ENSG00000100285	NEFH
KAF7200162.1	G4P62_016730	ENSG00000100296	THOC5
KAF7200163.1	G4P62_016730	ENSG00000100296	THOC5
KAF7200164.1	G4P62_016731	ENSG00000100109	TFIP11
KAF7200165.1	G4P62_016731	ENSG00000100109	TFIP11
KAF7200166.1	G4P62_016732	ENSG00000100104	SRRD
KAF7200167.1	G4P62_016733	ENSG00000132361	CLUH
KAF7200168.1	G4P62_016734	ENSG00000085788	DDHD2
KAF7200169.1	G4P62_016734	ENSG00000085788	DDHD2
KAF7200170.1	G4P62_016734	ENSG00000085788	DDHD2
KAF7200171.1	G4P62_016735	ENSG00000147526	TACC1
KAF7200172.1	G4P62_016735	ENSG00000147526	TACC1
KAF7200173.1	G4P62_016735	ENSG00000147526	TACC1
KAF7200174.1	G4P62_016735	ENSG00000147526	TACC1
KAF7200175.1	G4P62_016736	ENSG00000169499	PLEKHA2
KAF7200176.1	G4P62_016736	ENSG00000169499	PLEKHA2
KAF7200177.1	G4P62_016737	ENSG00000089225	TBX5
KAF7200178.1	G4P62_016738	ENSG00000166578	IQCD
KAF7200179.1	G4P62_016739	ENSG00000186815	TPCN1
KAF7200180.1	G4P62_016739	ENSG00000186815	TPCN1
KAF7200181.1	G4P62_016739	ENSG00000186815	TPCN1
KAF7200182.1	G4P62_016739	ENSG00000186815	TPCN1
KAF7200183.1	G4P62_016739	ENSG00000186815	TPCN1
KAF7200184.1	G4P62_016740	ENSG00000089060	SLC8B1
KAF7200185.1	G4P62_016740	ENSG00000089060	SLC8B1
KAF7200186.1	G4P62_016741	ENSG00000072778	ACADVL
KAF7200187.1	G4P62_016741	ENSG00000072778	ACADVL
KAF7200188.1	G4P62_016742	ENSG00000133422	MORC2
KAF7200189.1	G4P62_016742	ENSG00000114487	MORC1
KAF7200190.1	G4P62_016743	ENSG00000106609	TMEM248
KAF7200191.1	G4P62_016744	ENSG00000151176	PLBD2
KAF7200192.1	G4P62_016745	ENSG00000122965	RBM19
KAF7200193.1	G4P62_016745	ENSG00000122965	RBM19
KAF7200194.1	G4P62_016746	ENSG00000275744	SLC2A11
KAF7200195.1	G4P62_016747	ENSG00000275744	SLC2A11
KAF7200196.1	G4P62_016747	ENSG00000275744	SLC2A11
KAF7200197.1	G4P62_016748	ENSG00000185739	SRL
KAF7200198.1	G4P62_016749	ENSG00000183773	AIFM3
KAF7200199.1	G4P62_016750	ENSG00000177300	CLDN22
KAF7200200.1	G4P62_016751	ENSG00000099949	LZTR1
KAF7200201.1	G4P62_016752	ENSG00000128242	GAL3ST1
KAF7200202.1	G4P62_016753	ENSG00000100029	PES1
KAF7200203.1	G4P62_016754	ENSG00000187848	P2RX2
KAF7200204.1	G4P62_016755	ENSG00000177084	POLE
KAF7200205.1	G4P62_016756	ENSG00000076555	ACACB
KAF7200206.1	G4P62_016757	ENSG00000139445	FOXN4
KAF7200207.1	G4P62_016758	ENSG00000110906	KCTD10
KAF7200208.1	G4P62_016759	ENSG00000151148	UBE3B
KAF7200209.1	G4P62_016760	ENSG00000006534	ALDH3B1
KAF7200210.1	G4P62_016761	ENSG00000139428	MMAB
KAF7200211.1	G4P62_016762	ENSG00000110921	MVK
KAF7200212.1	G4P62_016763	ENSG00000139438	FAM222A
KAF7200213.1	G4P62_016763	ENSG00000139438	FAM222A
KAF7200214.1	G4P62_016764	ENSG00000111199	TRPV4
KAF7200215.1	G4P62_016764	ENSG00000111199	TRPV4
KAF7200216.1	G4P62_016764	ENSG00000111199	TRPV4
KAF7200217.1	G4P62_016765	ENSG00000139433	GLTP
KAF7200218.1	G4P62_016766	ENSG00000139437	TCHP
KAF7200219.1	G4P62_016766	ENSG00000139437	TCHP
KAF7200220.1	G4P62_016766	ENSG00000139437	TCHP
KAF7200221.1	G4P62_016766	ENSG00000139437	TCHP
KAF7200222.1	G4P62_016767	ENSG00000139436	GIT2
KAF7200223.1	G4P62_016767	ENSG00000139436	GIT2
KAF7200224.1	G4P62_016767	ENSG00000139436	GIT2
KAF7200225.1	G4P62_016767	ENSG00000139436	GIT2
KAF7200226.1	G4P62_016767	ENSG00000139436	GIT2
KAF7200227.1	G4P62_016767	ENSG00000139436	GIT2
KAF7200228.1	G4P62_016767	ENSG00000139436	GIT2
KAF7200229.1	G4P62_016768	ENSG00000076513	ANKRD13A
KAF7200230.1	G4P62_016769	ENSG00000108576	SLC6A4
KAF7200231.1	G4P62_016770	ENSG00000167037	SGSM1
KAF7200232.1	G4P62_016770	ENSG00000167037	SGSM1
KAF7200233.1	G4P62_016771	ENSG00000257218	GATC
KAF7200234.1	G4P62_016772	ENSG00000170315	UBB
KAF7200235.1	G4P62_016773	ENSG00000176894	PXMP2
KAF7200236.1	G4P62_016774	ENSG00000076248	UNG
KAF7200237.1	G4P62_016774	ENSG00000076248	UNG
KAF7200238.1	G4P62_016775	ENSG00000189046	ALKBH2
KAF7200239.1	G4P62_016776	ENSG00000135093	USP30
KAF7200240.1	G4P62_016776	ENSG00000135093	USP30
KAF7200241.1	G4P62_016777	ENSG00000166111	SVOP
KAF7200242.1	G4P62_016778	ENSG00000110887	DAO
KAF7200243.1	G4P62_016779	ENSG00000084112	SSH1
KAF7200244.1	G4P62_016779	ENSG00000084112	SSH1
KAF7200245.1	G4P62_016780	ENSG00000110880	CORO1C
KAF7200246.1	G4P62_016780	ENSG00000110880	CORO1C
KAF7200247.1	G4P62_016780	ENSG00000110880	CORO1C
KAF7200248.1	G4P62_016781	ENSG00000183160	TMEM119
KAF7200249.1	G4P62_016782	ENSG00000136003	ISCU
KAF7200250.1	G4P62_016783	ENSG00000075856	SART3
KAF7200251.1	G4P62_016784	ENSG00000198855	FICD
KAF7200252.1	G4P62_016785	ENSG00000174600	CMKLR1
KAF7200253.1	G4P62_016786	ENSG00000075035	WSCD2
KAF7200254.1	G4P62_016786	ENSG00000075035	WSCD2
KAF7200255.1	G4P62_016786	ENSG00000075035	WSCD2
KAF7200256.1	G4P62_016787	ENSG00000182541	LIMK2
KAF7200257.1	G4P62_016788	ENSG00000100100	PIK3IP1
KAF7200258.1	G4P62_016789	ENSG00000115970	THADA
KAF7200259.1	G4P62_016789	ENSG00000115970	THADA
KAF7200260.1	G4P62_016790	ENSG00000168778	TCTN2
KAF7200261.1	G4P62_016790	ENSG00000168778	TCTN2
KAF7200262.1	G4P62_016790	ENSG00000168778	TCTN2
KAF7200263.1	G4P62_016791	ENSG00000185344	ATP6V0A2
KAF7200264.1	G4P62_016792	ENSG00000186998	EMID1
KAF7200265.1	G4P62_016792	ENSG00000186998	EMID1
KAF7200266.1	G4P62_016793	ENSG00000100263	RHBDD3
KAF7200267.1	G4P62_016794	ENSG00000182944	EWSR1
KAF7200268.1	G4P62_016794	ENSG00000182944	EWSR1
KAF7200269.1	G4P62_016794	ENSG00000182944	EWSR1
KAF7200270.1	G4P62_016794	ENSG00000182944	EWSR1
KAF7200271.1	G4P62_016794	ENSG00000182944	EWSR1
KAF7200272.1	G4P62_016795	ENSG00000185340	GAS2L1
KAF7200273.1	G4P62_016796	ENSG00000100280	AP1B1
KAF7200274.1	G4P62_016796	ENSG00000100280	AP1B1
KAF7200275.1	G4P62_016796	ENSG00000100280	AP1B1
KAF7200276.1	G4P62_016796	ENSG00000100280	AP1B1
KAF7200277.1	G4P62_016796	ENSG00000100280	AP1B1
KAF7200278.1	G4P62_016797	ENSG00000270885	RASL10B
KAF7200279.1	G4P62_016798	ENSG00000184792	OSBP2
KAF7200280.1	G4P62_016798	ENSG00000184792	OSBP2
KAF7200282.1	G4P62_016800	ENSG00000159873	CCDC117
KAF7200283.1	G4P62_016800	ENSG00000159873	CCDC117
KAF7200284.1	G4P62_016800	ENSG00000159873	CCDC117
KAF7200285.1	G4P62_016800	ENSG00000159873	CCDC117
KAF7200286.1	G4P62_016800	ENSG00000159873	CCDC117
KAF7200287.1	G4P62_016801	ENSG00000185339	TCN2
KAF7200288.1	G4P62_016802	ENSG00000156136	DCK
KAF7200289.1	G4P62_016803	ENSG00000156574	NODAL
KAF7200290.1	G4P62_016804	ENSG00000187840	EIF4EBP1
KAF7200291.1	G4P62_016805	ENSG00000029534	ANK1
KAF7200292.1	G4P62_016805	ENSG00000029534	ANK1
KAF7200293.1	G4P62_016805	ENSG00000029534	ANK1
KAF7200294.1	G4P62_016805	ENSG00000029534	ANK1
KAF7200295.1	G4P62_016805	ENSG00000029534	ANK1
KAF7200296.1	G4P62_016805	ENSG00000029534	ANK1
KAF7200297.1	G4P62_016805	ENSG00000029534	ANK1
KAF7200298.1	G4P62_016805	ENSG00000029534	ANK1
KAF7200299.1	G4P62_016805	ENSG00000029534	ANK1
KAF7200300.1	G4P62_016805	ENSG00000029534	ANK1
KAF7200301.1	G4P62_016805	ENSG00000029534	ANK1
KAF7200302.1	G4P62_016805	ENSG00000029534	ANK1
KAF7200303.1	G4P62_016806	ENSG00000221818	EBF2
KAF7200304.1	G4P62_016806	ENSG00000221818	EBF2
KAF7200305.1	G4P62_016806	ENSG00000221818	EBF2
KAF7200306.1	G4P62_016806	ENSG00000221818	EBF2
KAF7200307.1	G4P62_016807	ENSG00000197746	PSAP
KAF7200308.1	G4P62_016808	ENSG00000168883	USP39
KAF7200309.1	G4P62_016808	ENSG00000168883	USP39
KAF7200310.1	G4P62_016809	ENSG00000168887	C2orf68
KAF7200311.1	G4P62_016810	ENSG00000168906	MAT2A
KAF7200312.1	G4P62_016811	ENSG00000185133	INPP5J
KAF7200313.1	G4P62_016811	ENSG00000185133	INPP5J
KAF7200314.1	G4P62_016812	ENSG00000183963	SMTN
KAF7200315.1	G4P62_016812	ENSG00000183963	SMTN
KAF7200316.1	G4P62_016812	ENSG00000183963	SMTN
KAF7200317.1	G4P62_016812	ENSG00000183963	SMTN
KAF7200318.1	G4P62_016813	ENSG00000135148	TRAFD1
KAF7200319.1	G4P62_016813	ENSG00000135148	TRAFD1
KAF7200320.1	G4P62_016813	ENSG00000135148	TRAFD1
KAF7200321.1	G4P62_016814	ENSG00000114978	MOB1A
KAF7200322.1	G4P62_016815	ENSG00000065911	MTHFD2
KAF7200323.1	G4P62_016816	ENSG00000182196	ARL6IP4
KAF7200324.1	G4P62_016817	ENSG00000110697	PITPNM1
KAF7200325.1	G4P62_016817	ENSG00000090975	PITPNM2
KAF7200326.1	G4P62_016817	ENSG00000090975	PITPNM2
KAF7200327.1	G4P62_016817	ENSG00000090975	PITPNM2
KAF7200328.1	G4P62_016817	ENSG00000090975	PITPNM2
KAF7200329.1	G4P62_016818	ENSG00000130921	C12orf65
KAF7200330.1	G4P62_016819	ENSG00000183955	KMT5A
KAF7200331.1	G4P62_016820	ENSG00000150977	RILPL2
KAF7200332.1	G4P62_016821	ENSG00000188026	RILPL1
KAF7200333.1	G4P62_016822	ENSG00000130787	HIP1R
KAF7200334.1	G4P62_016823	ENSG00000182782	HCAR2
KAF7200335.1	G4P62_016824	ENSG00000184445	KNTC1
KAF7200336.1	G4P62_016825	ENSG00000111011	RSRC2
KAF7200339.1	G4P62_016827	ENSG00000033030	ZCCHC8
KAF7200340.1	G4P62_016828	ENSG00000130779	CLIP1
KAF7200341.1	G4P62_016828	ENSG00000130779	CLIP1
KAF7200342.1	G4P62_016828	ENSG00000130779	CLIP1
KAF7200343.1	G4P62_016828	ENSG00000130779	CLIP1
KAF7200344.1	G4P62_016828	ENSG00000130779	CLIP1
KAF7200345.1	G4P62_016828	ENSG00000130779	CLIP1
KAF7200346.1	G4P62_016829	ENSG00000158113	LRRC43
KAF7200347.1	G4P62_016830	ENSG00000281178	MLXIP
KAF7200348.1	G4P62_016830	ENSG00000281178	MLXIP
KAF7200349.1	G4P62_016830	ENSG00000281178	MLXIP
KAF7200350.1	G4P62_016830	ENSG00000281178	MLXIP
KAF7200351.1	G4P62_016830	ENSG00000281178	MLXIP
KAF7200352.1	G4P62_016830	ENSG00000281178	MLXIP
KAF7200353.1	G4P62_016831	ENSG00000158023	CFAP251
KAF7200354.1	G4P62_016831	ENSG00000158023	CFAP251
KAF7200355.1	G4P62_016831	ENSG00000158023	CFAP251
KAF7200356.1	G4P62_016832	ENSG00000154710	RABGEF1
KAF7200357.1	G4P62_016832	ENSG00000154710	RABGEF1
KAF7200358.1	G4P62_016833	ENSG00000110801	PSMD9
KAF7200359.1	G4P62_016834	ENSG00000175449	RFESD
KAF7200360.1	G4P62_016835	ENSG00000186638	KIF24
KAF7200361.1	G4P62_016835	ENSG00000186638	KIF24
KAF7200362.1	G4P62_016835	ENSG00000142945	KIF2C
KAF7200363.1	G4P62_016835	ENSG00000142945	KIF2C
KAF7200364.1	G4P62_016835	ENSG00000186638	KIF24
KAF7200365.1	G4P62_016835	ENSG00000142945	KIF2C
KAF7200366.1	G4P62_016835	ENSG00000186638	KIF24
KAF7200367.1	G4P62_016835	ENSG00000142945	KIF2C
KAF7200368.1	G4P62_016836	ENSG00000137073	UBAP2
KAF7200369.1	G4P62_016836	ENSG00000137073	UBAP2
KAF7200370.1	G4P62_016836	ENSG00000137073	UBAP2
KAF7200371.1	G4P62_016836	ENSG00000137073	UBAP2
KAF7200372.1	G4P62_016836	ENSG00000137073	UBAP2
KAF7200373.1	G4P62_016836	ENSG00000137073	UBAP2
KAF7200374.1	G4P62_016836	ENSG00000137073	UBAP2
KAF7200375.1	G4P62_016837	ENSG00000099139	PCSK5
KAF7200376.1	G4P62_016837	ENSG00000099139	PCSK5
KAF7200377.1	G4P62_016837	ENSG00000099139	PCSK5
KAF7200378.1	G4P62_016838	ENSG00000135002	RFK
KAF7200379.1	G4P62_016838	ENSG00000135002	RFK
KAF7200380.1	G4P62_016839	ENSG00000187210	GCNT1
KAF7200381.1	G4P62_016840	ENSG00000187210	GCNT1
KAF7200382.1	G4P62_016841	ENSG00000187210	GCNT1
KAF7200383.1	G4P62_016842	ENSG00000106772	PRUNE2
KAF7200384.1	G4P62_016842	ENSG00000106772	PRUNE2
KAF7200385.1	G4P62_016842	ENSG00000106772	PRUNE2
KAF7200386.1	G4P62_016843	ENSG00000171956	FOXB1
KAF7200387.1	G4P62_016844	ENSG00000183186	C2CD4C
KAF7200388.1	G4P62_016845	ENSG00000197969	VPS13A
KAF7200389.1	G4P62_016845	ENSG00000197969	VPS13A
KAF7200390.1	G4P62_016845	ENSG00000197969	VPS13A
KAF7200391.1	G4P62_016845	ENSG00000197969	VPS13A
KAF7200392.1	G4P62_016846	ENSG00000156049	GNA14
KAF7200393.1	G4P62_016847	ENSG00000156052	GNAQ
KAF7200394.1	G4P62_016848	ENSG00000148225	WDR31
KAF7200395.1	G4P62_016848	ENSG00000148225	WDR31
KAF7200396.1	G4P62_016849	ENSG00000184992	BRI3BP
KAF7200397.1	G4P62_016851	ENSG00000138696	BMPR1B
KAF7200398.1	G4P62_016852	ENSG00000163110	PDLIM5
KAF7200399.1	G4P62_016853	ENSG00000122375	OPN4
KAF7200400.1	G4P62_016854	ENSG00000156869	FRRS1
KAF7200401.1	G4P62_016855	ENSG00000164318	EGFLAM
KAF7200402.1	G4P62_016855	ENSG00000164318	EGFLAM
KAF7200403.1	G4P62_016856	ENSG00000168621	GDNF
KAF7200404.1	G4P62_016857	ENSG00000080986	NDC80
KAF7200405.1	G4P62_016858	ENSG00000164190	NIPBL
KAF7200406.1	G4P62_016858	ENSG00000164190	NIPBL
KAF7200407.1	G4P62_016858	ENSG00000164190	NIPBL
KAF7200408.1	G4P62_016859	ENSG00000079215	SLC1A3
KAF7200409.1	G4P62_016860	ENSG00000164187	LMBRD2
KAF7200410.1	G4P62_016861	ENSG00000135052	GOLM1
KAF7200411.1	G4P62_016861	ENSG00000135052	GOLM1
KAF7200412.1	G4P62_016862	ENSG00000135040	NAA35
KAF7200413.1	G4P62_016863	ENSG00000135049	AGTPBP1
KAF7200414.1	G4P62_016863	ENSG00000135049	AGTPBP1
KAF7200415.1	G4P62_016863	ENSG00000135049	AGTPBP1
KAF7200416.1	G4P62_016864	ENSG00000197506	SLC28A3
KAF7200417.1	G4P62_016865	ENSG00000178966	RMI1
KAF7200418.1	G4P62_016866	ENSG00000165119	HNRNPK
KAF7200419.1	G4P62_016866	ENSG00000165119	HNRNPK
KAF7200420.1	G4P62_016867	ENSG00000165118	C9orf64
KAF7200421.1	G4P62_016867	ENSG00000165118	C9orf64
KAF7200427.1	G4P62_016869	ENSG00000165115	KIF27
KAF7200428.1	G4P62_016869	ENSG00000165115	KIF27
KAF7200429.1	G4P62_016869	ENSG00000165115	KIF27
KAF7200430.1	G4P62_016870	ENSG00000165113	GKAP1
KAF7200431.1	G4P62_016870	ENSG00000165113	GKAP1
KAF7200432.1	G4P62_016871	ENSG00000148057	IDNK
KAF7200433.1	G4P62_016872	ENSG00000172159	FRMD3
KAF7200434.1	G4P62_016872	ENSG00000172159	FRMD3
KAF7200435.1	G4P62_016872	ENSG00000172159	FRMD3
KAF7200436.1	G4P62_016872	ENSG00000172159	FRMD3
KAF7200437.1	G4P62_016872	ENSG00000172159	FRMD3
KAF7200438.1	G4P62_016872	ENSG00000172159	FRMD3
KAF7200439.1	G4P62_016873	ENSG00000165105	RASEF
KAF7200440.1	G4P62_016874	ENSG00000196781	TLE1
KAF7200441.1	G4P62_016874	ENSG00000196781	TLE1
KAF7200442.1	G4P62_016875	ENSG00000141646	SMAD4
KAF7200443.1	G4P62_016875	ENSG00000141646	SMAD4
KAF7200444.1	G4P62_016876	ENSG00000176624	MEX3C
KAF7200445.1	G4P62_016877	ENSG00000134970	TMED7
KAF7200446.1	G4P62_016878	ENSG00000145780	FEM1C
KAF7200447.1	G4P62_016879	ENSG00000164221	CCDC112
KAF7200448.1	G4P62_016879	ENSG00000164221	CCDC112
KAF7200449.1	G4P62_016879	ENSG00000164221	CCDC112
KAF7200450.1	G4P62_016880	ENSG00000164219	PGGT1B
KAF7200451.1	G4P62_016881	ENSG00000152503	TRIM36
KAF7200452.1	G4P62_016881	ENSG00000152503	TRIM36
KAF7200453.1	G4P62_016881	ENSG00000152503	TRIM36
KAF7200454.1	G4P62_016882	ENSG00000184305	CCSER1
KAF7200455.1	G4P62_016882	ENSG00000184305	CCSER1
KAF7200456.1	G4P62_016882	ENSG00000184305	CCSER1
KAF7200457.1	G4P62_016882	ENSG00000184305	CCSER1
KAF7200458.1	G4P62_016886	ENSG00000152208	GRID2
KAF7200459.1	G4P62_016886	ENSG00000152208	GRID2
KAF7200460.1	G4P62_016887	ENSG00000163104	SMARCAD1
KAF7200462.1	G4P62_016889	ENSG00000172238	ATOH1
KAF7200463.1	G4P62_016890	ENSG00000197629	MPEG1
KAF7200465.1	G4P62_016892	ENSG00000197629	MPEG1
KAF7200466.1	G4P62_016893	ENSG00000124610	H1-1
KAF7200468.1	G4P62_016895	ENSG00000140391	TSPAN3
KAF7200469.1	G4P62_016896	ENSG00000141639	MAPK4
KAF7200470.1	G4P62_016896	ENSG00000141639	MAPK4
KAF7200471.1	G4P62_016897	ENSG00000141642	ELAC1
KAF7200472.1	G4P62_016898	ENSG00000155545	MIER3
KAF7200473.1	G4P62_016899	ENSG00000145632	PLK2
KAF7200474.1	G4P62_016900	ENSG00000103254	ANTKMT
KAF7200475.1	G4P62_016900	ENSG00000103254	ANTKMT
KAF7200476.1	G4P62_016901	ENSG00000152932	RAB3C
KAF7200477.1	G4P62_016901	ENSG00000152932	RAB3C
KAF7200478.1	G4P62_016902	ENSG00000113448	PDE4D
KAF7200479.1	G4P62_016902	ENSG00000113448	PDE4D
KAF7200480.1	G4P62_016903	ENSG00000164181	ELOVL7
KAF7200481.1	G4P62_016904	ENSG00000049167	ERCC8
KAF7200482.1	G4P62_016905	ENSG00000164182	NDUFAF2
KAF7200483.1	G4P62_016906	ENSG00000188725	SMIM15
KAF7200484.1	G4P62_016907	ENSG00000130449	ZSWIM6
KAF7200485.1	G4P62_016908	ENSG00000154330	PGM5
KAF7200486.1	G4P62_016909	ENSG00000170122	FOXD4
KAF7200487.1	G4P62_016910	ENSG00000172785	CBWD1
KAF7200488.1	G4P62_016910	ENSG00000172785	CBWD1
KAF7200489.1	G4P62_016910	ENSG00000172785	CBWD1
KAF7200490.1	G4P62_016910	ENSG00000172785	CBWD1
KAF7200491.1	G4P62_016910	ENSG00000172785	CBWD1
KAF7200492.1	G4P62_016911	ENSG00000107099	DOCK8
KAF7200493.1	G4P62_016911	ENSG00000107099	DOCK8
KAF7200494.1	G4P62_016911	ENSG00000107099	DOCK8
KAF7200495.1	G4P62_016912	ENSG00000148120	AOPEP
KAF7200496.1	G4P62_016913	ENSG00000158169	FANCC
KAF7200497.1	G4P62_016913	ENSG00000158169	FANCC
KAF7200498.1	G4P62_016914	ENSG00000182150	ERCC6L2
KAF7200499.1	G4P62_016915	ENSG00000130948	HSD17B3
KAF7200500.1	G4P62_016916	ENSG00000178394	HTR1A
KAF7200501.1	G4P62_016917	ENSG00000164197	RNF180
KAF7200502.1	G4P62_016918	ENSG00000186479	RGS7BP
KAF7200503.1	G4P62_016919	ENSG00000112936	C7
KAF7200504.1	G4P62_016920	ENSG00000182836	PLCXD3
KAF7200505.1	G4P62_016921	ENSG00000083720	OXCT1
KAF7200506.1	G4P62_016922	ENSG00000182405	PGBD4
KAF7200507.1	G4P62_016923	ENSG00000205765	C5orf51
KAF7200508.1	G4P62_016924	ENSG00000151876	FBXO4
KAF7200509.1	G4P62_016924	ENSG00000151876	FBXO4
KAF7200510.1	G4P62_016925	ENSG00000112964	GHR
KAF7200511.1	G4P62_016925	ENSG00000112964	GHR
KAF7200512.1	G4P62_016926	ENSG00000172262	ZNF131
KAF7200513.1	G4P62_016926	ENSG00000172262	ZNF131
KAF7200514.1	G4P62_016926	ENSG00000172262	ZNF131
KAF7200515.1	G4P62_016927	ENSG00000177453	NIM1K
KAF7200516.1	G4P62_016928	ENSG00000060566	CREB3L3
KAF7200517.1	G4P62_016928	ENSG00000060566	CREB3L3
KAF7200518.1	G4P62_016929	ENSG00000130222	GADD45G
KAF7200519.1	G4P62_016930	ENSG00000184349	EFNA5
KAF7200520.1	G4P62_016932	ENSG00000145743	FBXL17
KAF7200521.1	G4P62_016933	ENSG00000158122	PRXL2C
KAF7200522.1	G4P62_016934	ENSG00000079335	CDC14A
KAF7200523.1	G4P62_016934	ENSG00000079335	CDC14A
KAF7200524.1	G4P62_016934	ENSG00000079335	CDC14A
KAF7200525.1	G4P62_016934	ENSG00000079335	CDC14A
KAF7200526.1	G4P62_016934	ENSG00000079335	CDC14A
KAF7200527.1	G4P62_016935	ENSG00000130956	HABP4
KAF7200528.1	G4P62_016938	ENSG00000101200	AVP
KAF7200529.1	G4P62_016939	ENSG00000185019	UBOX5
KAF7200530.1	G4P62_016939	ENSG00000185019	UBOX5
KAF7200531.1	G4P62_016940	ENSG00000088899	LZTS3
KAF7200532.1	G4P62_016941	ENSG00000153531	ADPRHL1
KAF7200533.1	G4P62_016942	ENSG00000115593	SMYD1
KAF7200534.1	G4P62_016942	ENSG00000115593	SMYD1
KAF7200535.1	G4P62_016943	ENSG00000163586	FABP1
KAF7200536.1	G4P62_016944	ENSG00000101200	AVP
KAF7200537.1	G4P62_016944	ENSG00000101200	AVP
KAF7200538.1	G4P62_016945	ENSG00000178175	ZNF366
KAF7200539.1	G4P62_016946	ENSG00000113048	MRPS27
KAF7200540.1	G4P62_016947	ENSG00000171522	PTGER4
KAF7200541.1	G4P62_016948	ENSG00000167210	LOXHD1
KAF7200542.1	G4P62_016949	ENSG00000167210	LOXHD1
KAF7200543.1	G4P62_016950	ENSG00000167210	LOXHD1
KAF7200544.1	G4P62_016950	ENSG00000167210	LOXHD1
KAF7200545.1	G4P62_016951	ENSG00000141622	RNF165
KAF7200546.1	G4P62_016951	ENSG00000141622	RNF165
KAF7200547.1	G4P62_016952	ENSG00000152234	ATP5F1A
KAF7200548.1	G4P62_016953	ENSG00000067113	PLPP1
KAF7200549.1	G4P62_016954	ENSG00000147408	CSGALNACT1
KAF7200550.1	G4P62_016955	ENSG00000133874	RNF122
KAF7200551.1	G4P62_016955	ENSG00000133874	RNF122
KAF7200552.1	G4P62_016956	ENSG00000137563	GGH
KAF7200553.1	G4P62_016957	ENSG00000106733	NMRK1
KAF7200554.1	G4P62_016958	ENSG00000134996	OSTF1
KAF7200555.1	G4P62_016959	ENSG00000089022	MAPKAPK5
KAF7200556.1	G4P62_016959	ENSG00000089022	MAPKAPK5
KAF7200557.1	G4P62_016959	ENSG00000089022	MAPKAPK5
KAF7200558.1	G4P62_016960	ENSG00000204842	ATXN2
KAF7200559.1	G4P62_016960	ENSG00000204842	ATXN2
KAF7200560.1	G4P62_016960	ENSG00000204842	ATXN2
KAF7200561.1	G4P62_016961	ENSG00000111252	SH2B3
KAF7200562.1	G4P62_016961	ENSG00000111252	SH2B3
KAF7200563.1	G4P62_016962	ENSG00000198324	PHETA1
KAF7200564.1	G4P62_016963	ENSG00000184838	PRR16
KAF7200565.1	G4P62_016964	ENSG00000133835	HSD17B4
KAF7200566.1	G4P62_016965	ENSG00000172869	DMXL1
KAF7200567.1	G4P62_016966	ENSG00000092421	SEMA6A
KAF7200568.1	G4P62_016966	ENSG00000092421	SEMA6A
KAF7200569.1	G4P62_016967	ENSG00000177879	AP3S1
KAF7200570.1	G4P62_016967	ENSG00000177879	AP3S1
KAF7200571.1	G4P62_016967	ENSG00000177879	AP3S1
KAF7200572.1	G4P62_016968	ENSG00000129596	CDO1
KAF7200573.1	G4P62_016969	ENSG00000148019	CEP78
KAF7200574.1	G4P62_016969	ENSG00000148019	CEP78
KAF7200575.1	G4P62_016969	ENSG00000148019	CEP78
KAF7200576.1	G4P62_016970	ENSG00000113594	LIFR
KAF7200577.1	G4P62_016970	ENSG00000113594	LIFR
KAF7200578.1	G4P62_016971	ENSG00000152582	SPEF2
KAF7200580.1	G4P62_016973	ENSG00000241360	PDXP
KAF7200581.1	G4P62_016974	ENSG00000278461	MRPS36
KAF7200582.1	G4P62_016975	ENSG00000145692	BHMT
KAF7200583.1	G4P62_016976	ENSG00000145685	LHFPL2
KAF7200584.1	G4P62_016977	ENSG00000085365	SCAMP1
KAF7200585.1	G4P62_016977	ENSG00000085365	SCAMP1
KAF7200586.1	G4P62_016978	ENSG00000171540	OTP
KAF7200587.1	G4P62_016979	ENSG00000145708	CRHBP
KAF7200588.1	G4P62_016980	ENSG00000131730	CKMT2
KAF7200589.1	G4P62_016981	ENSG00000113319	RASGRF2
KAF7200590.1	G4P62_016982	ENSG00000113319	RASGRF2
KAF7200591.1	G4P62_016983	ENSG00000113318	MSH3
KAF7200593.1	G4P62_016985	ENSG00000164976	MYORG
KAF7200594.1	G4P62_016985	ENSG00000164976	MYORG
KAF7200595.1	G4P62_016985	ENSG00000164976	MYORG
KAF7200596.1	G4P62_016986	ENSG00000182264	IZUMO1
KAF7200597.1	G4P62_016986	ENSG00000182264	IZUMO1
KAF7200598.1	G4P62_016987	ENSG00000158050	DUSP2
KAF7200599.1	G4P62_016988	ENSG00000274286	ADRA2B
KAF7200600.1	G4P62_016989	ENSG00000119927	GPAM
KAF7200601.1	G4P62_016989	ENSG00000119927	GPAM
KAF7200602.1	G4P62_016989	ENSG00000119927	GPAM
KAF7200603.1	G4P62_016989	ENSG00000119927	GPAM
KAF7200604.1	G4P62_016989	ENSG00000119927	GPAM
KAF7200605.1	G4P62_016990	ENSG00000115042	FAHD2A
KAF7200606.1	G4P62_016991	ENSG00000215440	NPEPL1
KAF7200607.1	G4P62_016992	ENSG00000132646	PCNA
KAF7200608.1	G4P62_016993	ENSG00000115041	KCNIP3
KAF7200609.1	G4P62_016993	ENSG00000115041	KCNIP3
KAF7200610.1	G4P62_016994	ENSG00000089057	SLC23A2
KAF7200611.1	G4P62_016995	ENSG00000101265	RASSF2
KAF7200612.1	G4P62_016996	ENSG00000101265	RASSF2
KAF7200613.1	G4P62_016997	ENSG00000131981	LGALS3
KAF7200614.1	G4P62_016998	ENSG00000165046	LETM2
KAF7200615.1	G4P62_016999	ENSG00000147548	NSD3
KAF7200616.1	G4P62_016999	ENSG00000147548	NSD3
KAF7200617.1	G4P62_016999	ENSG00000147548	NSD3
KAF7200618.1	G4P62_016999	ENSG00000147548	NSD3
KAF7200619.1	G4P62_017000	ENSG00000203805	PLPP4
KAF7200620.1	G4P62_017000	ENSG00000203805	PLPP4
KAF7200621.1	G4P62_017001	ENSG00000093009	CDC45
KAF7200622.1	G4P62_017002	ENSG00000184113	CLDN5
KAF7200623.1	G4P62_017003	ENSG00000168385	SEPTIN2
KAF7200624.1	G4P62_017004	ENSG00000184702	SEPTIN5
KAF7200625.1	G4P62_017004	ENSG00000284874
KAF7200626.1	G4P62_017005	ENSG00000203618	GP1BB
KAF7200627.1	G4P62_017006	ENSG00000150990	DHX37
KAF7200628.1	G4P62_017007	ENSG00000070010	UFD1
KAF7200629.1	G4P62_017008	ENSG00000242259	C22orf39
KAF7200630.1	G4P62_017009	ENSG00000185608	MRPL40
KAF7200631.1	G4P62_017010	ENSG00000167315	ACAA2
KAF7200632.1	G4P62_017011	ENSG00000089009	RPL6
KAF7200633.1	G4P62_017012	ENSG00000264364	DYNLL2
KAF7200634.1	G4P62_017013	ENSG00000070501	POLB
KAF7200635.1	G4P62_017014	ENSG00000124074	ENKD1
KAF7200636.1	G4P62_017015	ENSG00000165637	VDAC2
KAF7200637.1	G4P62_017015	ENSG00000165637	VDAC2
KAF7200638.1	G4P62_017015	ENSG00000165637	VDAC2
KAF7200639.1	G4P62_017015	ENSG00000165637	VDAC2
KAF7200640.1	G4P62_017016	ENSG00000104365	IKBKB
KAF7200641.1	G4P62_017016	ENSG00000104365	IKBKB
KAF7200642.1	G4P62_017017	ENSG00000104368	PLAT
KAF7200643.1	G4P62_017017	ENSG00000104368	PLAT
KAF7200644.1	G4P62_017017	ENSG00000104368	PLAT
KAF7200645.1	G4P62_017018	ENSG00000141367	CLTC
KAF7200646.1	G4P62_017018	ENSG00000141367	CLTC
KAF7200647.1	G4P62_017018	ENSG00000141367	CLTC
KAF7200648.1	G4P62_017018	ENSG00000141367	CLTC
KAF7200649.1	G4P62_017018	ENSG00000141367	CLTC
KAF7200650.1	G4P62_017018	ENSG00000141367	CLTC
KAF7200651.1	G4P62_017018	ENSG00000141367	CLTC
KAF7200652.1	G4P62_017019	ENSG00000100075	SLC25A1
KAF7200653.1	G4P62_017020	ENSG00000099940	SNAP29
KAF7200654.1	G4P62_017020	ENSG00000099940	SNAP29
KAF7200655.1	G4P62_017021	ENSG00000241973	PI4KA
KAF7200656.1	G4P62_017021	ENSG00000241973	PI4KA
KAF7200657.1	G4P62_017022	ENSG00000099937	SERPIND1
KAF7200658.1	G4P62_017022	ENSG00000099937	SERPIND1
KAF7200659.1	G4P62_017023	ENSG00000241973	PI4KA
KAF7200660.1	G4P62_017024	ENSG00000169635	HIC2
KAF7200661.1	G4P62_017025	ENSG00000169508	GPR183
KAF7200662.1	G4P62_017026	ENSG00000145741	BTF3
KAF7200663.1	G4P62_017027	ENSG00000164338	UTP15
KAF7200664.1	G4P62_017028	ENSG00000214944	ARHGEF28
KAF7200665.1	G4P62_017028	ENSG00000214944	ARHGEF28
KAF7200666.1	G4P62_017028	ENSG00000214944	ARHGEF28
KAF7200667.1	G4P62_017029	ENSG00000113594	LIFR
KAF7200668.1	G4P62_017030	ENSG00000106636	YKT6
KAF7200669.1	G4P62_017030	ENSG00000106636	YKT6
KAF7200670.1	G4P62_017031	ENSG00000106633	GCK
KAF7200671.1	G4P62_017032	ENSG00000106631	MYL7
KAF7200672.1	G4P62_017033	ENSG00000138678	GPAT3
KAF7200674.1	G4P62_017035	ENSG00000180423	HARBI1
KAF7200675.1	G4P62_017035	ENSG00000180423	HARBI1
KAF7200676.1	G4P62_017036	ENSG00000151388	ADAMTS12
KAF7200677.1	G4P62_017037	ENSG00000070193	FGF10
KAF7200678.1	G4P62_017038	ENSG00000172239	PAIP1
KAF7200679.1	G4P62_017039	ENSG00000164171	ITGA2
KAF7200680.1	G4P62_017040	ENSG00000134363	FST
KAF7200681.1	G4P62_017040	ENSG00000134363	FST
KAF7200682.1	G4P62_017040	ENSG00000134363	FST
KAF7200683.1	G4P62_017041	ENSG00000164258	NDUFS4
KAF7200684.1	G4P62_017042	ENSG00000185305	ARL15
KAF7200685.1	G4P62_017042	ENSG00000185305	ARL15
KAF7200686.1	G4P62_017042	ENSG00000185305	ARL15
KAF7200687.1	G4P62_017043	ENSG00000178996	SNX18
KAF7200688.1	G4P62_017044	ENSG00000173546	CSPG4
KAF7200689.1	G4P62_017045	ENSG00000183077	AFMID
KAF7200690.1	G4P62_017046	ENSG00000101670	LIPG
KAF7200691.1	G4P62_017047	ENSG00000176407	KCMF1
KAF7200692.1	G4P62_017048	ENSG00000168575	SLC20A2
KAF7200693.1	G4P62_017048	ENSG00000168575	SLC20A2
KAF7200694.1	G4P62_017048	ENSG00000168575	SLC20A2
KAF7200695.1	G4P62_017048	ENSG00000168575	SLC20A2
KAF7200696.1	G4P62_017048	ENSG00000168575	SLC20A2
KAF7200697.1	G4P62_017048	ENSG00000168575	SLC20A2
KAF7200698.1	G4P62_017049	ENSG00000163738	MTHFD2L
KAF7200699.1	G4P62_017050	ENSG00000182585	EPGN
KAF7200700.1	G4P62_017051	ENSG00000124882	EREG
KAF7200701.1	G4P62_017052	ENSG00000109321	AREG
KAF7200702.1	G4P62_017052	ENSG00000109321	AREG
KAF7200703.1	G4P62_017053	ENSG00000164287	CDC20B
KAF7200704.1	G4P62_017054	ENSG00000164294	GPX8
KAF7200705.1	G4P62_017055	ENSG00000234602	MCIDAS
KAF7200706.1	G4P62_017056	ENSG00000152669	CCNO
KAF7200707.1	G4P62_017057	ENSG00000134744	TUT4
KAF7200708.1	G4P62_017057	ENSG00000134744	TUT4
KAF7200709.1	G4P62_017058	ENSG00000135070	ISCA1
KAF7200710.1	G4P62_017059	ENSG00000135069	PSAT1
KAF7200711.1	G4P62_017060	ENSG00000106829	TLE4
KAF7200712.1	G4P62_017060	ENSG00000106829	TLE4
KAF7200713.1	G4P62_017060	ENSG00000106829	TLE4
KAF7200714.1	G4P62_017060	ENSG00000106829	TLE4
KAF7200715.1	G4P62_017060	ENSG00000106829	TLE4
KAF7200716.1	G4P62_017061	ENSG00000131844	MCCC2
KAF7200717.1	G4P62_017061	ENSG00000131844	MCCC2
KAF7200718.1	G4P62_017062	ENSG00000137103	TMEM8B
KAF7200719.1	G4P62_017063	ENSG00000113407	TARS1
KAF7200720.1	G4P62_017064	ENSG00000180447	GAS1
KAF7200721.1	G4P62_017065	ENSG00000280975	CENATAC
KAF7200722.1	G4P62_017066	ENSG00000005238	FAM214B
KAF7200723.1	G4P62_017066	ENSG00000005238	FAM214B
KAF7200724.1	G4P62_017066	ENSG00000005238	FAM214B
KAF7200725.1	G4P62_017066	ENSG00000005238	FAM214B
KAF7200726.1	G4P62_017067	ENSG00000168060	NAALADL1
KAF7200727.1	G4P62_017068	ENSG00000164307	ERAP1
KAF7200737.1	G4P62_017071	ENSG00000178950	GAK
KAF7200738.1	G4P62_017071	ENSG00000178950	GAK
KAF7200739.1	G4P62_017072	ENSG00000081760	AACS
KAF7200740.1	G4P62_017073	ENSG00000181234	TMEM132C
KAF7200741.1	G4P62_017074	ENSG00000175471	MCTP1
KAF7200742.1	G4P62_017075	ENSG00000108932	SLC16A6
KAF7200743.1	G4P62_017076	ENSG00000178445	GLDC
KAF7200744.1	G4P62_017077	ENSG00000173085	COQ2
KAF7200745.1	G4P62_017078	ENSG00000148143	ZNF462
KAF7200746.1	G4P62_017079	ENSG00000109736	MFSD10
KAF7200747.1	G4P62_017080	ENSG00000187742	SECISBP2
KAF7200748.1	G4P62_017080	ENSG00000187742	SECISBP2
KAF7200749.1	G4P62_017080	ENSG00000187742	SECISBP2
KAF7200750.1	G4P62_017080	ENSG00000187742	SECISBP2
KAF7200751.1	G4P62_017081	ENSG00000172175	MALT1
KAF7200752.1	G4P62_017081	ENSG00000172175	MALT1
KAF7200753.1	G4P62_017081	ENSG00000172175	MALT1
KAF7200754.1	G4P62_017081	ENSG00000172175	MALT1
KAF7200755.1	G4P62_017082	ENSG00000170571	EMB
KAF7200756.1	G4P62_017083	ENSG00000112996	MRPS30
KAF7200757.1	G4P62_017084	ENSG00000137133	HINT2
KAF7200758.1	G4P62_017085	ENSG00000130377	ACSBG2
KAF7200759.1	G4P62_017085	ENSG00000130377	ACSBG2
KAF7200760.1	G4P62_017086	ENSG00000090013	BLVRB
KAF7200761.1	G4P62_017086	ENSG00000090013	BLVRB
KAF7200762.1	G4P62_017086	ENSG00000090013	BLVRB
KAF7200763.1	G4P62_017087	ENSG00000156194	PPEF2
KAF7200764.1	G4P62_017088	ENSG00000138760	SCARB2
KAF7200765.1	G4P62_017088	ENSG00000138760	SCARB2
KAF7200766.1	G4P62_017443	ENSG00000118640	VAMP8
KAF7200767.1	G4P62_017444	ENSG00000121152	NCAPH
KAF7200768.1	G4P62_017444	ENSG00000121152	NCAPH
KAF7200769.1	G4P62_017684	ENSG00000188986	NELFB
KAF7200770.1	G4P62_017713	ENSG00000188986	NELFB
KAF7200771.1	G4P62_017720	ENSG00000279247	AK6
KAF7200772.1	G4P62_017721	ENSG00000172458	IL17D
KAF7200774.1	G4P62_017971	ENSG00000134013	LOXL2
KAF7200775.1	G4P62_017972	ENSG00000162144	CYB561A3
KAF7200776.1	G4P62_017973	ENSG00000106479	ZNF862
KAF7200777.1	G4P62_017974	ENSG00000188647	PTAR1
KAF7200778.1	G4P62_017975	ENSG00000152942	RAD17
KAF7200779.1	G4P62_017975	ENSG00000152942	RAD17
KAF7200780.1	G4P62_017987	ENSG00000127191	TRAF2
KAF7200781.1	G4P62_018121	ENSG00000148408	CACNA1B
KAF7200782.1	G4P62_018161	ENSG00000116701	NCF2
KAF7200783.1	G4P62_018161	ENSG00000116701	NCF2
KAF7200784.1	G4P62_018327	ENSG00000100034	PPM1F
KAF7200785.1	G4P62_018327	ENSG00000100034	PPM1F
KAF7200786.1	G4P62_018328	ENSG00000113161	HMGCR
KAF7200787.1	G4P62_018329	ENSG00000128228	SDF2L1
KAF7200788.1	G4P62_018330	ENSG00000152939	MARVELD2
KAF7200789.1	G4P62_018331	ENSG00000197822	OCLN
KAF7200790.1	G4P62_018332	ENSG00000276910	GTF2H2
KAF7200791.1	G4P62_018502	ENSG00000038427	VCAN
KAF7200792.1	G4P62_018503	ENSG00000145681	HAPLN1
KAF7200793.1	G4P62_018685	ENSG00000185651	UBE2L3
KAF7200794.1	G4P62_018759	ENSG00000232040	ZBED9
KAF7200795.1	G4P62_018759	ENSG00000232040	ZBED9
[truncated: 30,089 more rows]
